# Supplementary material for: A general environmentally friendly access to long chain fatty acid ionic liquids (LCFA-ILs)
Source: Royal Society of Chemistry journal article supplement (doi:10.1039/c7gc00830a), 2017-01-01

# A general environmentally friendly (sustainable) access to long chain fatty acid ionic liquids (LCFA-ILs)

Andrea Mezzetta,<sup>[a]</sup> Lorenzo Guazzelli,<sup>\*[a]</sup> Maurizia Seggiani,<sup>[b]</sup> Christian Silvio Pomelli,<sup>[a]</sup>  
Monica Puccini,<sup>[b]</sup> and Cinzia Chiappe<sup>\*[a]</sup>

## *Supporting Information*

### *Table of contents*

<sup>1</sup>H- and <sup>13</sup>C-NMR spectra of compounds **1-15** pages S2-S46

IR spectra of compounds **1-15** pages S47-S61

Thermal gravimetric analysis (TGA) of compounds **1-15** page S62

Viscosity trend as a function of the temperature page of compounds **6-15** S63-S64

DSC thermogram of compounds **1,2,4,6,7,9,11-14** S65-S74

---

[a] Mr A. Mezzetta, Prof. C. S. Pomelli, Dr L. Guazzelli, Prof. C. Chiappe  
Department of Pharmacy  
University of Pisa  
Via Bonanno 6, Pisa (Italy)  
E-mail: lorenzo.guazzelli@unipi.it, cinzia.chiappe@unipi.it

[b] Prof. M. Seggiani, Dr. M. Puccini  
Department of Civil and Industrial Engineering  
University of Pisa  
Largo Lucio Lazzarino 2, Pisa (Italy)  
E-mail: Maurizia.seggiani@unipi.it

Supporting information for this article is given via a link at the end of the document.

Fig S1:  $^1\text{H}$  NMR of **1** at 25  $^\circ\text{C}$

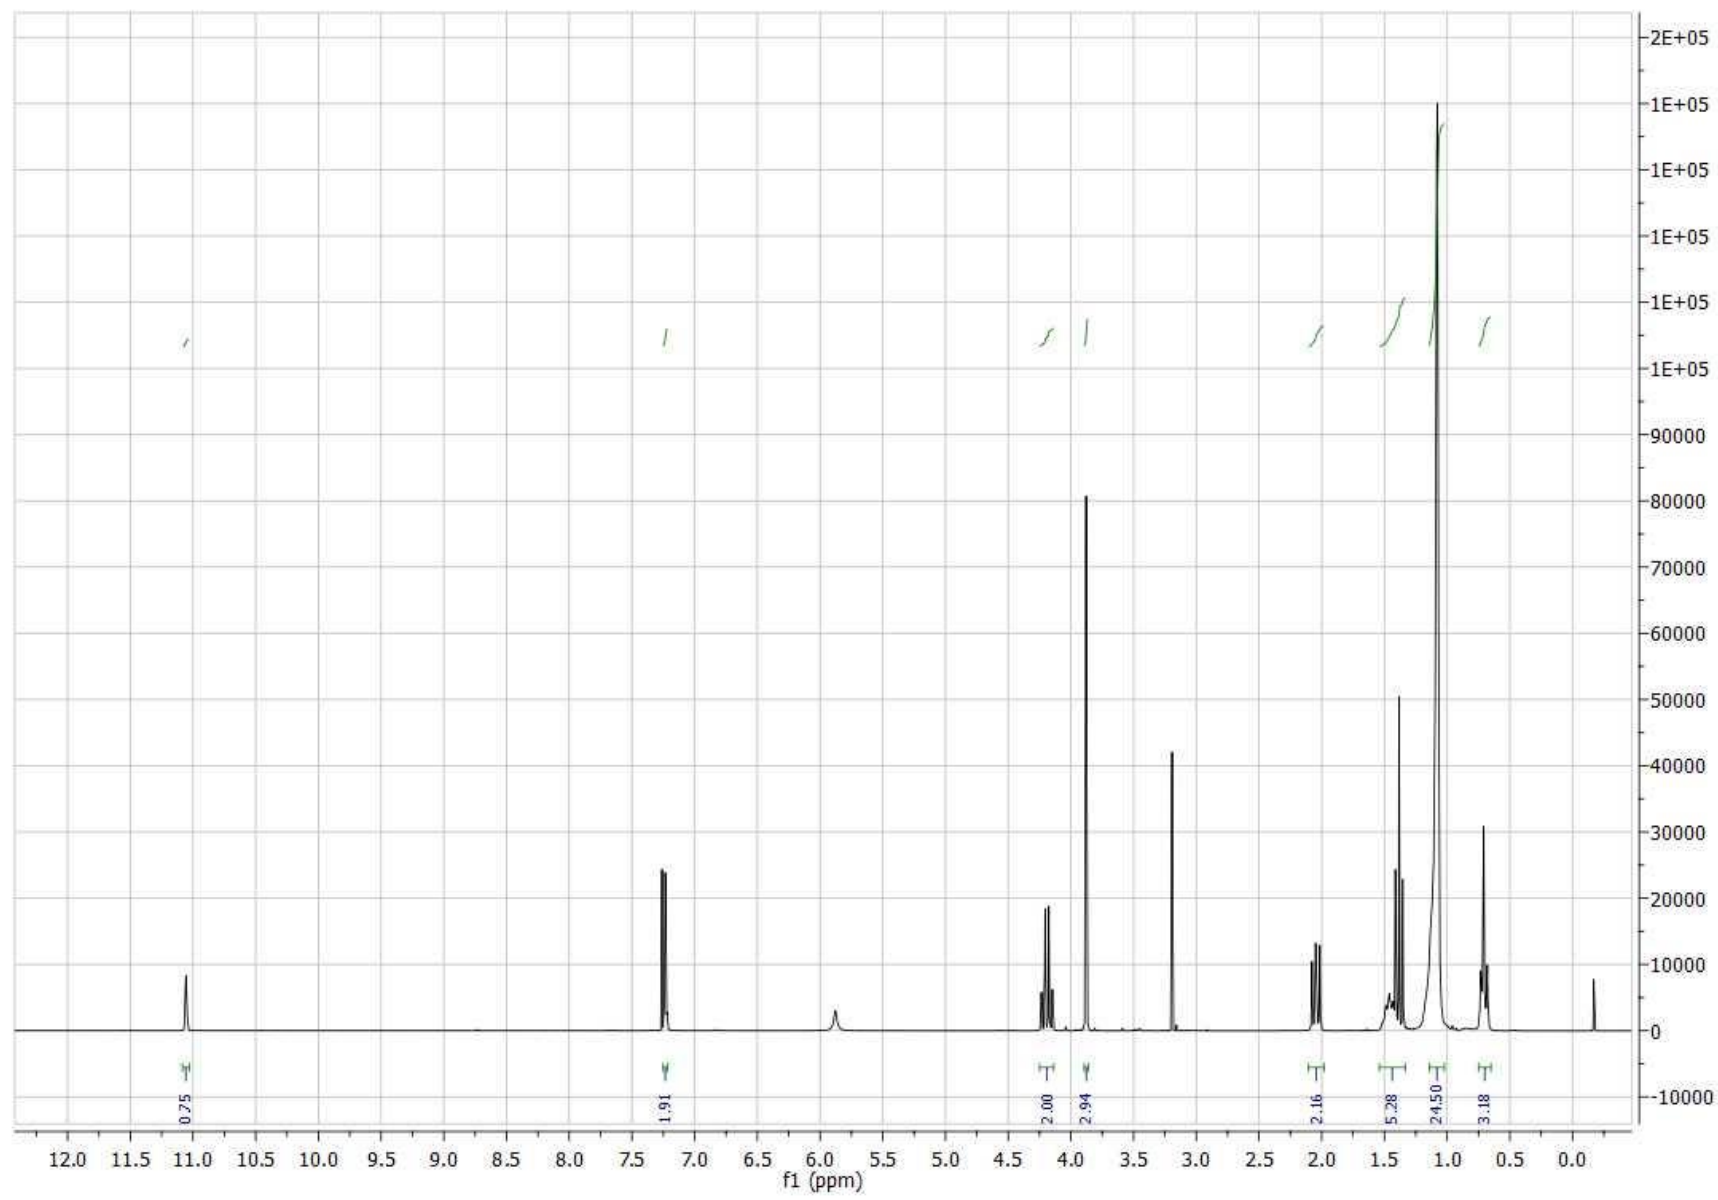

Fig S2:  $^{13}\text{C}$  NMR of **1** at 25 °C

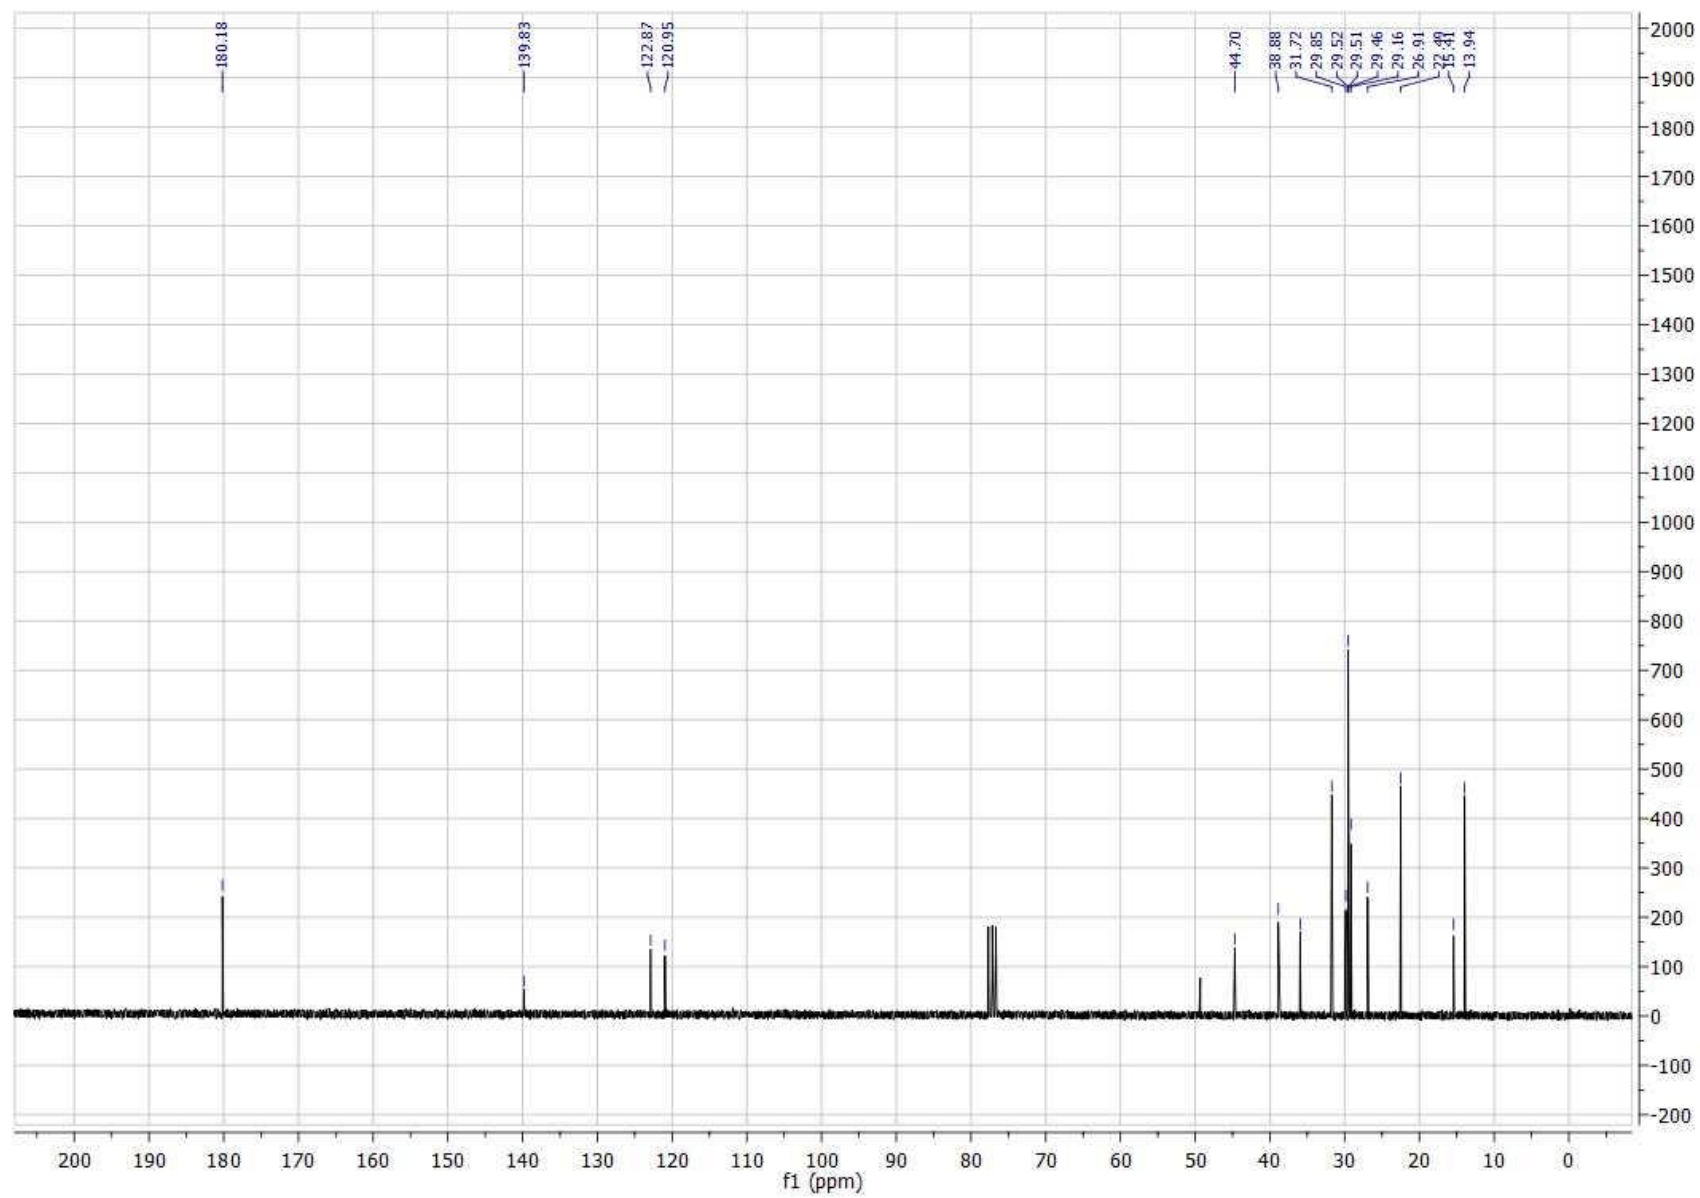

**Table S1.** Peak assignments and integrals of the <sup>1</sup>H-NMR spectrum of **1** at 25°C.

| [EMIM]                     | [C <sub>16</sub> ]       | δ (ppm)   | Shape | Integral |
|----------------------------|--------------------------|-----------|-------|----------|
| C(2)H imidazolium          | -                        | 11,06     | s     | 0,75     |
| CHCl <sub>3</sub>          | -                        | 7,26      | s     | -        |
| C(4-5)H imidazolium        | -                        | 7,24      | t     | 1,91     |
| C(1) H <sub>2</sub> chain  | -                        | 4,19      | m     | 2,00     |
| C (1')H <sub>3</sub> chain | -                        | 3,88      | s     | 2,94     |
| MeOH                       | -                        | 3,19      | s     | -        |
| -                          | C(2)H <sub>2</sub>       | 2,05      | t     | 2,16     |
| -                          | C(3)H <sub>2</sub>       | 1,46      | p     | 2,04     |
| C(2) chainH <sub>3</sub>   | -                        | 1,38      | t     | 3,14     |
| -                          | C(4 to 15)H <sub>2</sub> | 1,22-0,99 | m     | 24,5     |
| -                          | C(18)H <sub>3</sub>      | 0,71      | t     | 3,18     |

**Table S2.** Peak assignments of the <sup>13</sup>C-NMR spectrum of **1** at 25°C.

| [EMIM]                                | [C <sub>16</sub> ]  | δ (ppm)    | [EMIM]                   | [C <sub>16</sub> ]     | δ (ppm) |
|---------------------------------------|---------------------|------------|--------------------------|------------------------|---------|
| -                                     | C(1)OO-             | 180,2      | -                        | C(chain)H <sub>2</sub> | 29,9    |
| C(2)H imidazolium                     | -                   | 139,8      | -                        | C(chain)H <sub>2</sub> | 29,5-   |
| C(4)H imidazolium                     | -                   | 122,9      | -                        |                        | 29,4    |
| C(5)H imidazolium                     | -                   | 121,0      | -                        | C(chain)H <sub>2</sub> | 29,2    |
| CDCl <sub>3</sub> , CHCl <sub>3</sub> |                     | 77.7-76.7, | -                        | C(chain)H <sub>2</sub> | 22,5    |
| MeOD                                  |                     | 77.2       | C(2)H <sub>3</sub> chain | -                      | 15,4    |
| C(1)H <sub>2</sub> chain              | -                   | 49,3       | -                        | C(16)H <sub>3</sub>    | 14,0    |
| -                                     | C(1)H <sub>2</sub>  | 44,7       |                          |                        |         |
| -                                     | C(1)H <sub>2</sub>  | 38,8       |                          |                        |         |
| C(1')H <sub>3</sub>                   | -                   | 36,0       |                          |                        |         |
| -                                     | C(14)H <sub>2</sub> | 31,7       |                          |                        |         |

Fig S3:  $^1\text{H}$  NMR of **2** at 25  $^\circ\text{C}$

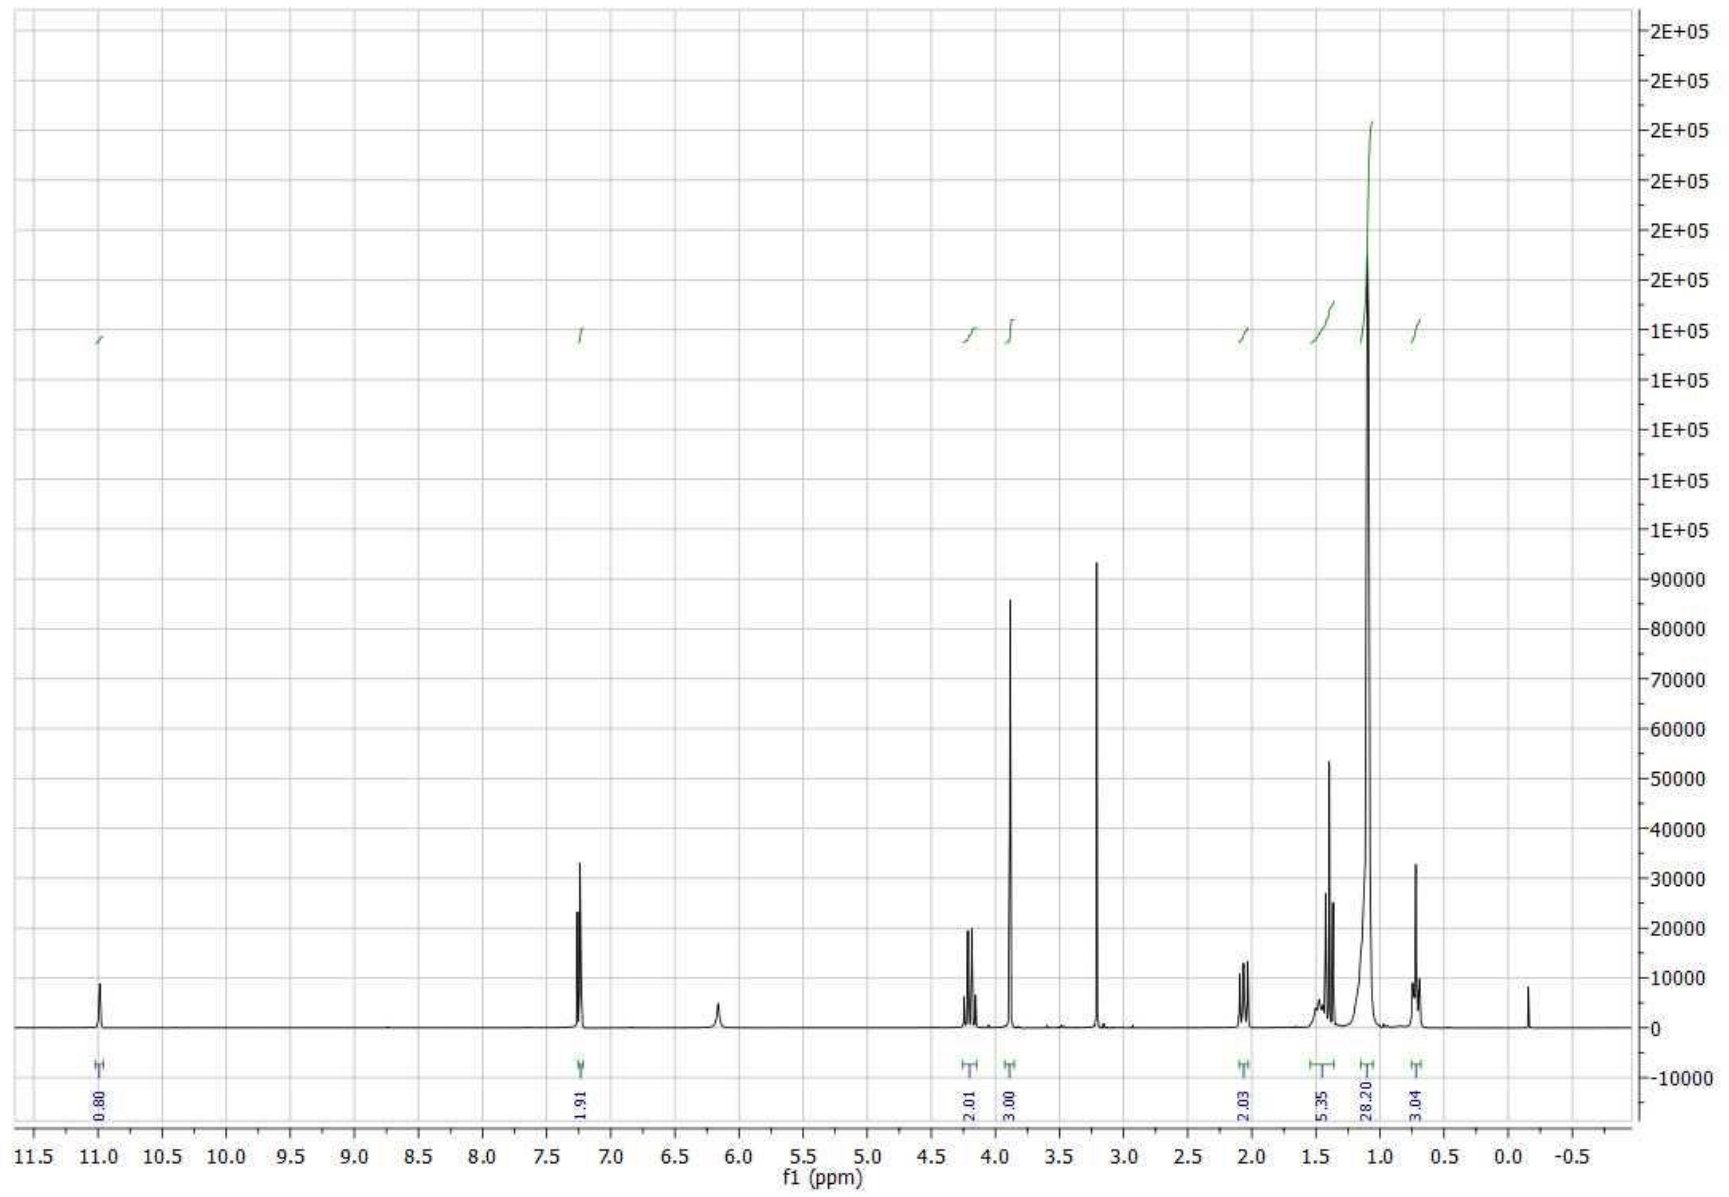

Fig S4:  $^{13}\text{C}$  NMR of **2** at 25  $^{\circ}\text{C}$

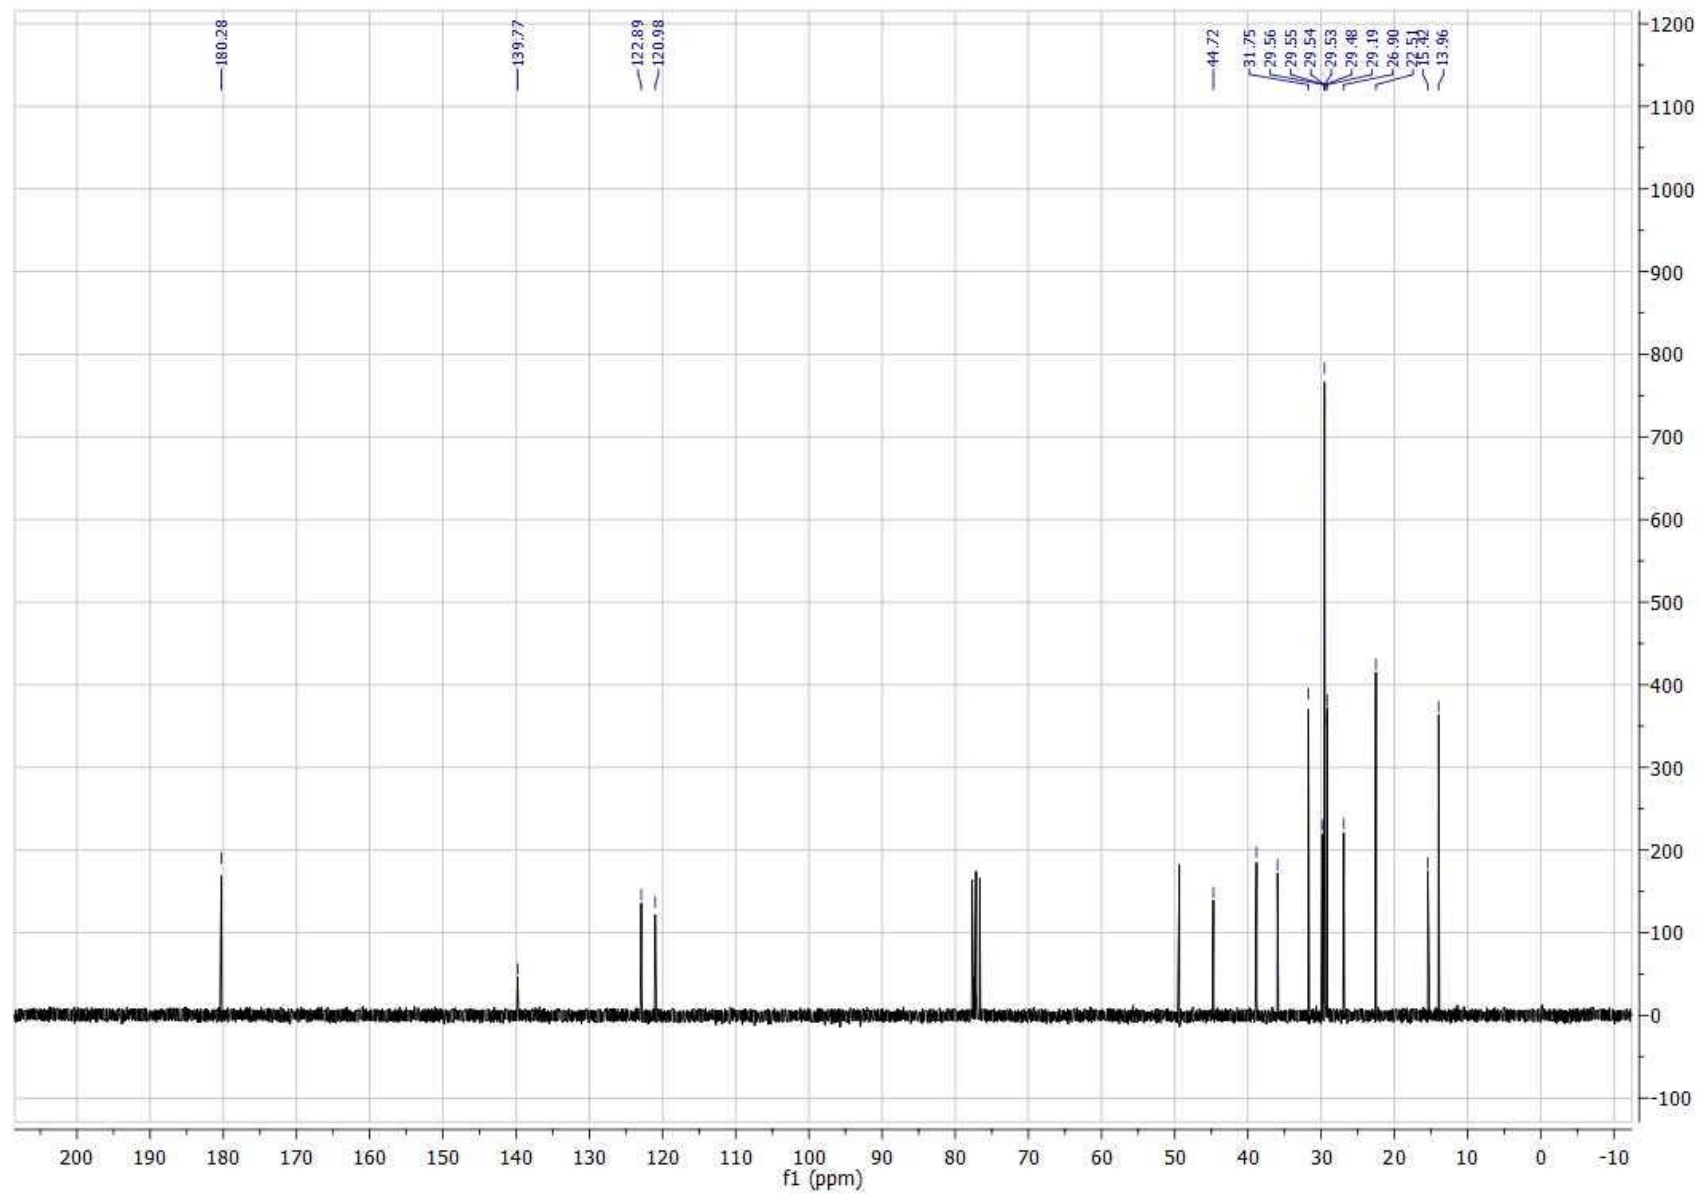

**Table S3.** Peak assignments and integrals of the <sup>1</sup>H-NMR spectrum of **2** at 25°C.

| [EMIM]                     | [C <sub>18</sub> ]       | δ (ppm)   | Shape | Integral |
|----------------------------|--------------------------|-----------|-------|----------|
| C(2)H imidazolium          | -                        | 10,99     | s     | 0,80     |
| CHCl <sub>3</sub>          | -                        | 7,26      | s     | -        |
| C(4-5)H imidazolium        | -                        | 7,24      | t     | 1,91     |
| C(1) H <sub>2</sub> chain  | -                        | 4,20      | m     | 2,01     |
| C (1')H <sub>3</sub> chain | -                        | 3,89      | s     | 3,00     |
| MeOH                       | -                        | 3,20      | s     | -        |
| -                          | C(2)H <sub>2</sub>       | 1,96      | t     | 1,99     |
| -                          | C(3)H <sub>2</sub>       | 1,47      | p     | 2,22     |
| C(2) chainH <sub>3</sub>   | -                        | 1,40      | t     | 3,28     |
| -                          | C(4 to 17)H <sub>2</sub> | 1,24-0,98 | m     | 28,2     |
| -                          | C(18)H <sub>3</sub>      | 0,72      | t     | 3,04     |

**Table S4.** Peak assignments of the <sup>13</sup>C-NMR spectrum of **2** at 25°C.

| [EMIM]                                | [C <sub>18</sub> ]  | δ (ppm)    | [EMIM]                   | [C <sub>18</sub> ]     | δ (ppm) |
|---------------------------------------|---------------------|------------|--------------------------|------------------------|---------|
| -                                     | C(1)OO-             | 180,3      | -                        | C(chain)H <sub>2</sub> | 29,9    |
| C(2)H imidazolium                     | -                   | 139,8      | -                        | C(chain)H <sub>2</sub> | 29,6-   |
| C(4)H imidazolium                     | -                   | 122,9      | -                        |                        | 29,5    |
| C(5)H imidazolium                     | -                   | 121,0      | -                        | C(chain)H <sub>2</sub> | 29,5    |
|                                       |                     |            | -                        | C(chain)H <sub>2</sub> | 29,2    |
| CDCl <sub>3</sub> , CHCl <sub>3</sub> |                     | 77.7-76.7, | -                        | C(chain)H <sub>2</sub> | 22,5    |
| MeOD                                  |                     | 77.2       | C(2)H <sub>3</sub> chain | -                      | 15,4    |
| C(1)H <sub>2</sub> chain              | -                   | 44,7       | -                        | C(16)H <sub>3</sub>    | 14,0    |
| -                                     | C(1)H <sub>2</sub>  | 38,8       |                          |                        |         |
| C(1')H <sub>3</sub>                   | -                   | 36,0       |                          |                        |         |
| -                                     | C(16)H <sub>2</sub> | 31,8       |                          |                        |         |

Fig S5:  $^1\text{H}$  NMR of **3** at 25  $^\circ\text{C}$

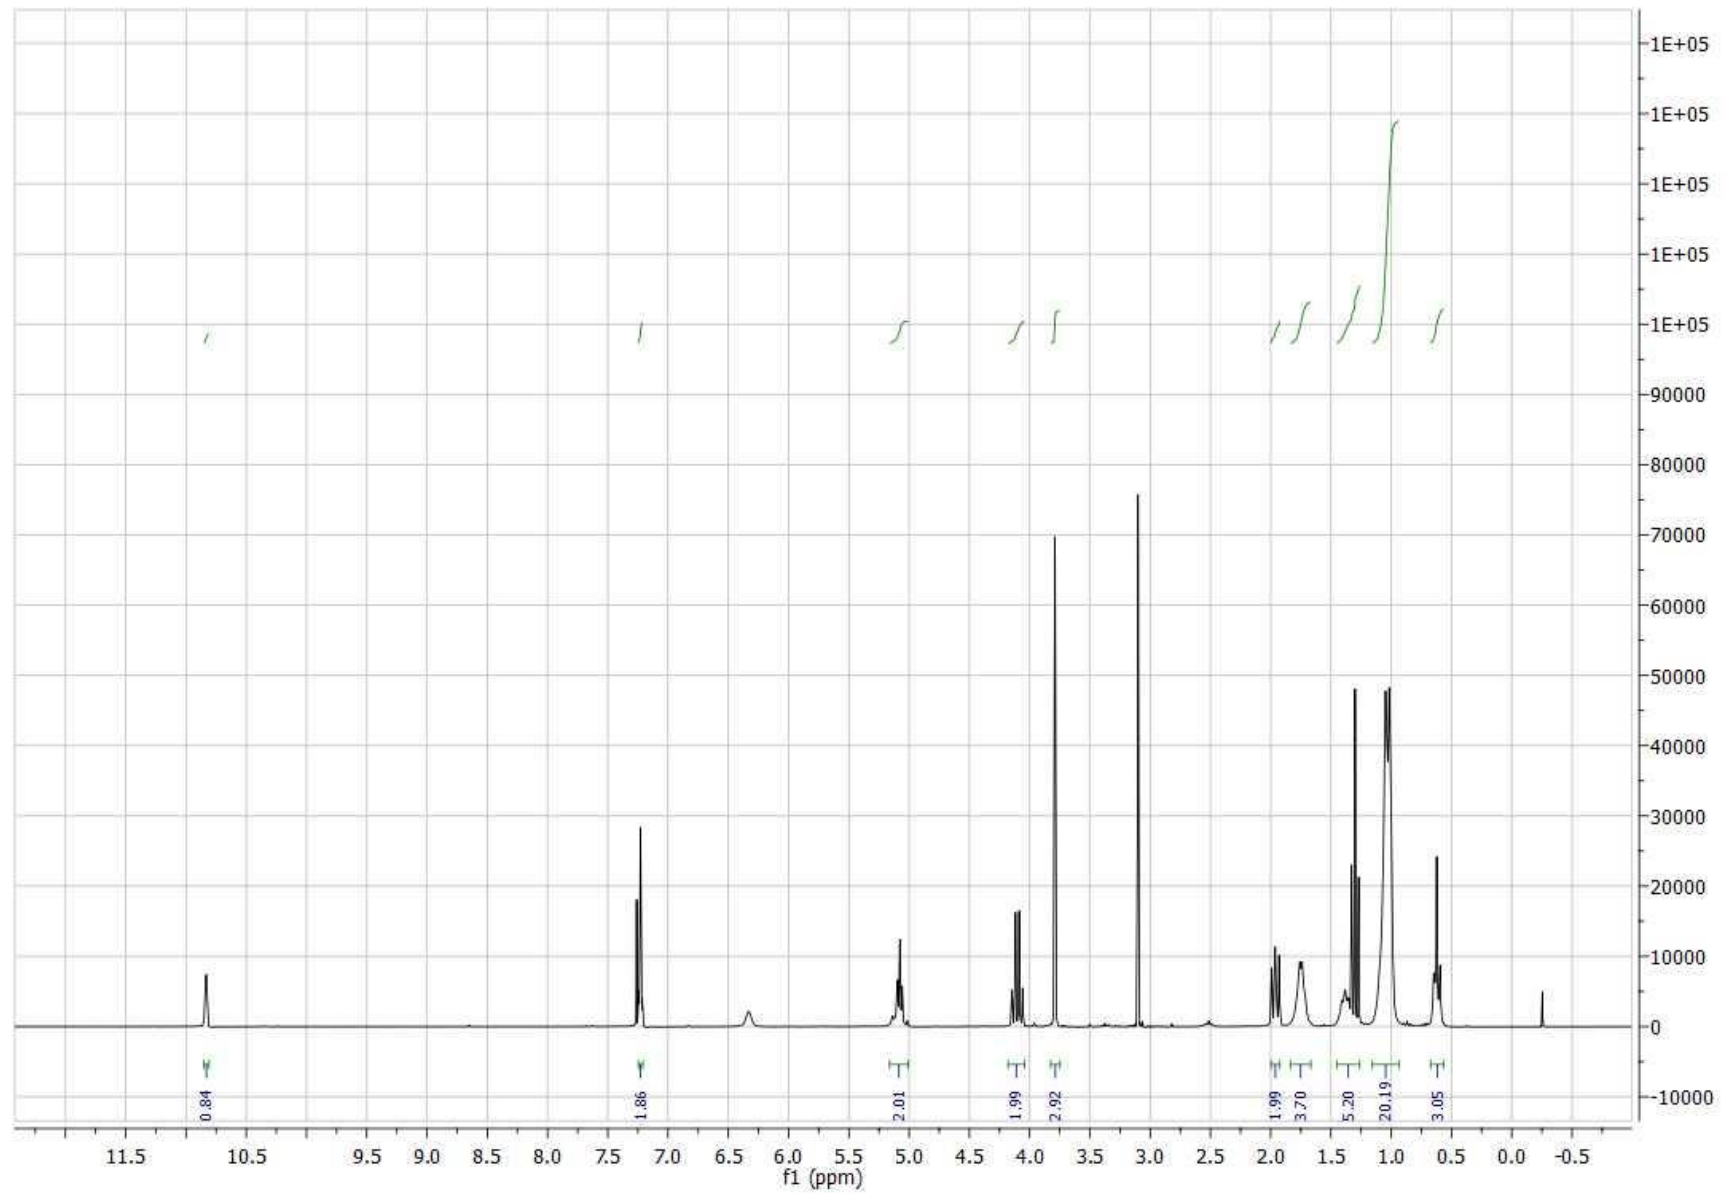



Fig S6:  $^{13}\text{C}$  NMR of **3** at 25 °C

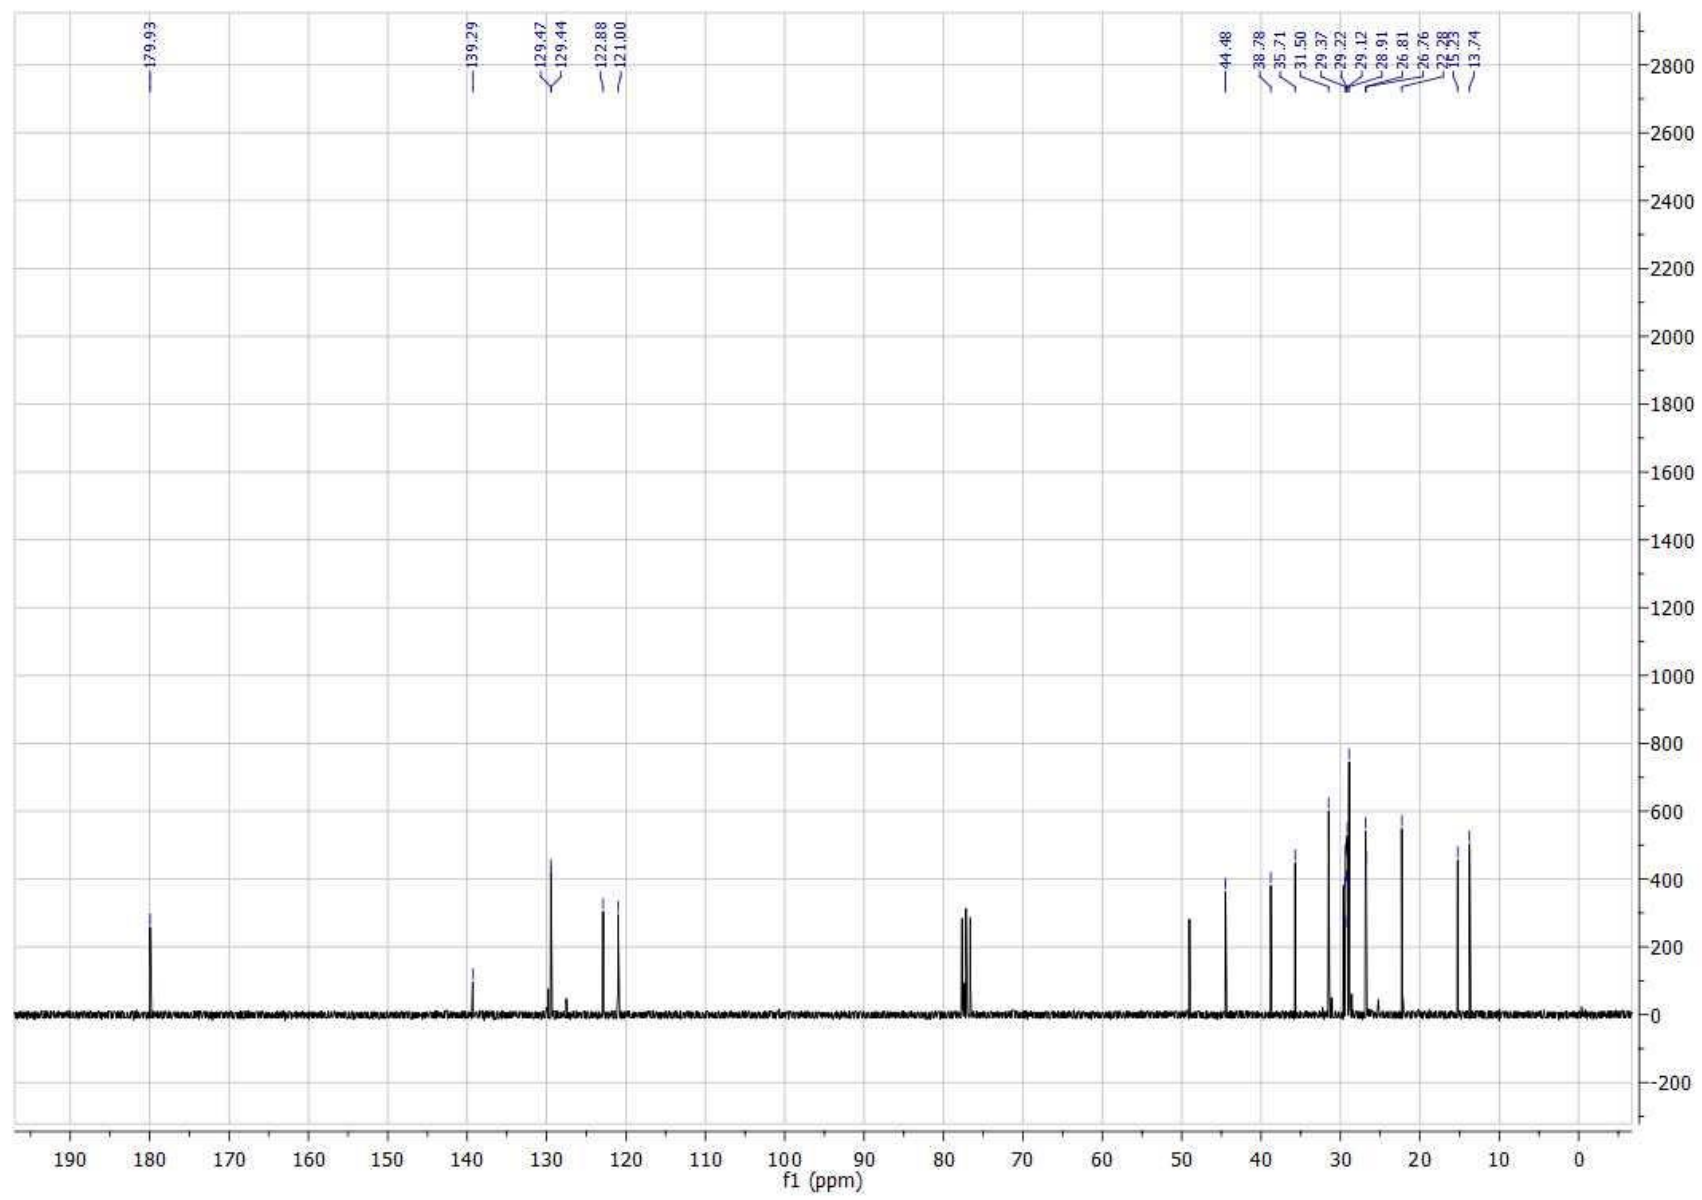

**Table S5.** Peak assignments and integrals of the <sup>1</sup>H-NMR spectrum of **3** at 25°C.

| [EMIM]                     | [C <sub>18:1</sub> tested according to Ph.Eur.] | δ (ppm)   | Shape | Integral |
|----------------------------|-------------------------------------------------|-----------|-------|----------|
| C(2)H imidazolium          | -                                               | 10,83     | s     | 0,84     |
| CHCl <sub>3</sub>          | -                                               | 7,26      | s     | -        |
| C(4-5)H imidazolium        | -                                               | 7,23      | t     | 1,86     |
| -                          | C(9,10)H                                        | 5,15-5,00 | m     | 2,01     |
| C(1) H <sub>2</sub> chain  | -                                               | 4,10      | m     | 1,99     |
| C (1')H <sub>3</sub> chain | -                                               | 3,79      | s     | 2,92     |
| MeOH                       | -                                               | 3,10      | s     | -        |
| -                          | C(2)H <sub>2</sub>                              | 1,96      | t     | 1,99     |
| -                          | C(8,11)H <sub>2</sub>                           | 1,84-1,65 | m     | 3,70     |
| -                          | C(3)H <sub>2</sub>                              | 1,38      | p     | 2,08     |
| C(2) chainH <sub>3</sub>   | -                                               | 1,30      | t     | 3,12     |
| -                          | C(4 to 8, 12-17)H <sub>2</sub>                  | 1,15-0,91 | m     | 20,19    |
| -                          | C(18)H <sub>3</sub>                             | 0,62      | t     | 3,05     |

**Table S6.** Peak assignments of the <sup>13</sup>C-NMR spectrum of **3** at 25°C.

| [EMIM]                                | [C <sub>18:1</sub> tested according to Ph.Eur.] | δ (ppm)            | [EMIM]                   | [C <sub>18:1</sub> tested according to Ph.Eur.] | δ (ppm)   |
|---------------------------------------|-------------------------------------------------|--------------------|--------------------------|-------------------------------------------------|-----------|
| -                                     | C(1)OO-                                         | 179,8              | -                        | C(chain)H <sub>2</sub>                          | 29,6-28,9 |
| C(2)H imidazolium                     | -                                               | 139,8              | -                        | C(11)H <sub>2</sub>                             | 26,9      |
| -                                     | C(9,10)H                                        | 129,5-129,4        | -                        | C(9)H <sub>2</sub>                              | 26,8      |
| -                                     | C(linoleic)H                                    | 127,5              | -                        | C(3)H <sub>2</sub>                              | 26,8      |
| C(4)H imidazolium                     | -                                               | 122,9              | -                        | C(17)H <sub>2</sub>                             | 22,4      |
| C(5)H imidazolium                     | -                                               | 121,0              | C(2)H <sub>3</sub> chain | -                                               | 15,2      |
| CDCl <sub>3</sub> , CHCl <sub>3</sub> | -                                               | 77.7-76.7,<br>77.2 | -                        | C(18)H <sub>3</sub>                             | 13,7      |
| MeOD                                  | -                                               | 49,0               |                          |                                                 |           |
| C(1) H <sub>2</sub> chain             | -                                               | 44,5               |                          |                                                 |           |
| -                                     | C(1)H <sub>2</sub>                              | 38,8               |                          |                                                 |           |
| C(1')H <sub>3</sub>                   | -                                               | 35,7               |                          |                                                 |           |
| -                                     | C(16)H <sub>2</sub>                             | 31,8               |                          |                                                 |           |

Fig S7:  $^1\text{H}$  NMR of **4** at 25 °C

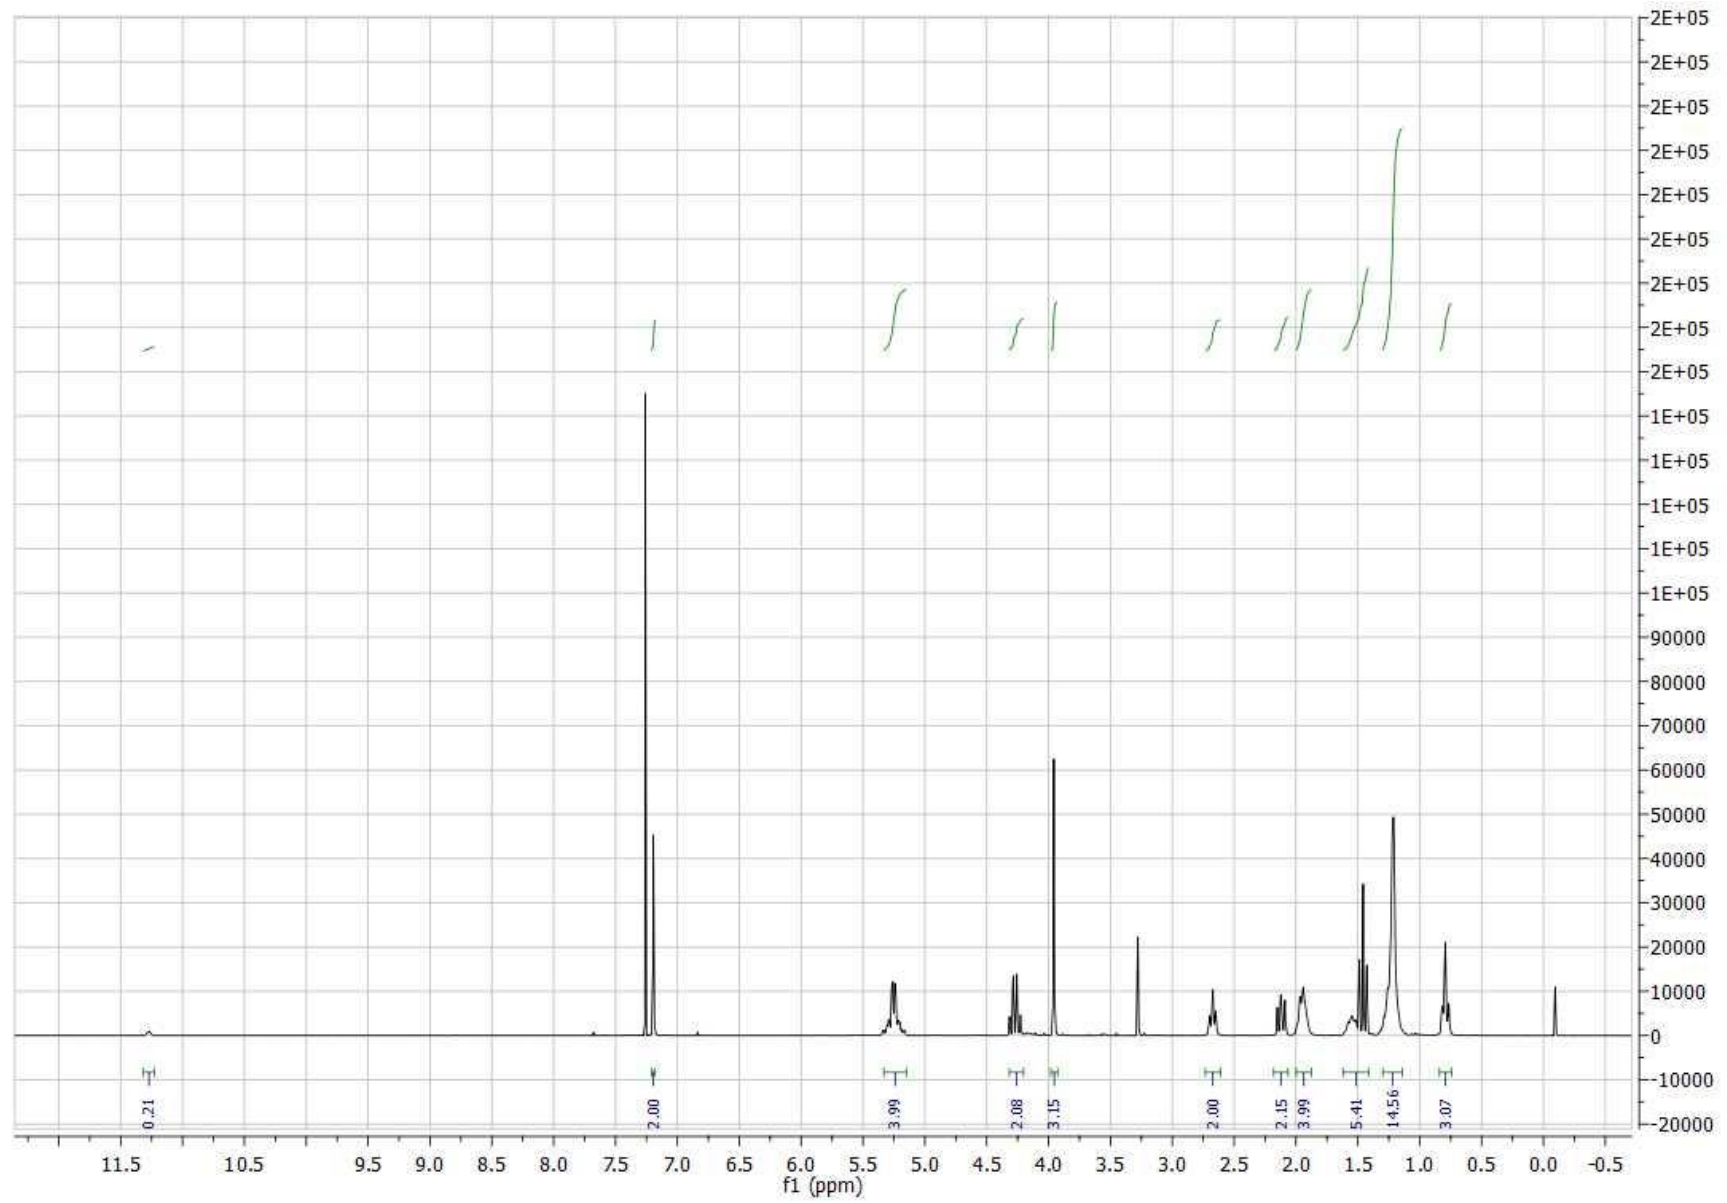

Fig S8:  $^{13}\text{C}$  NMR of **4** at 25 °C

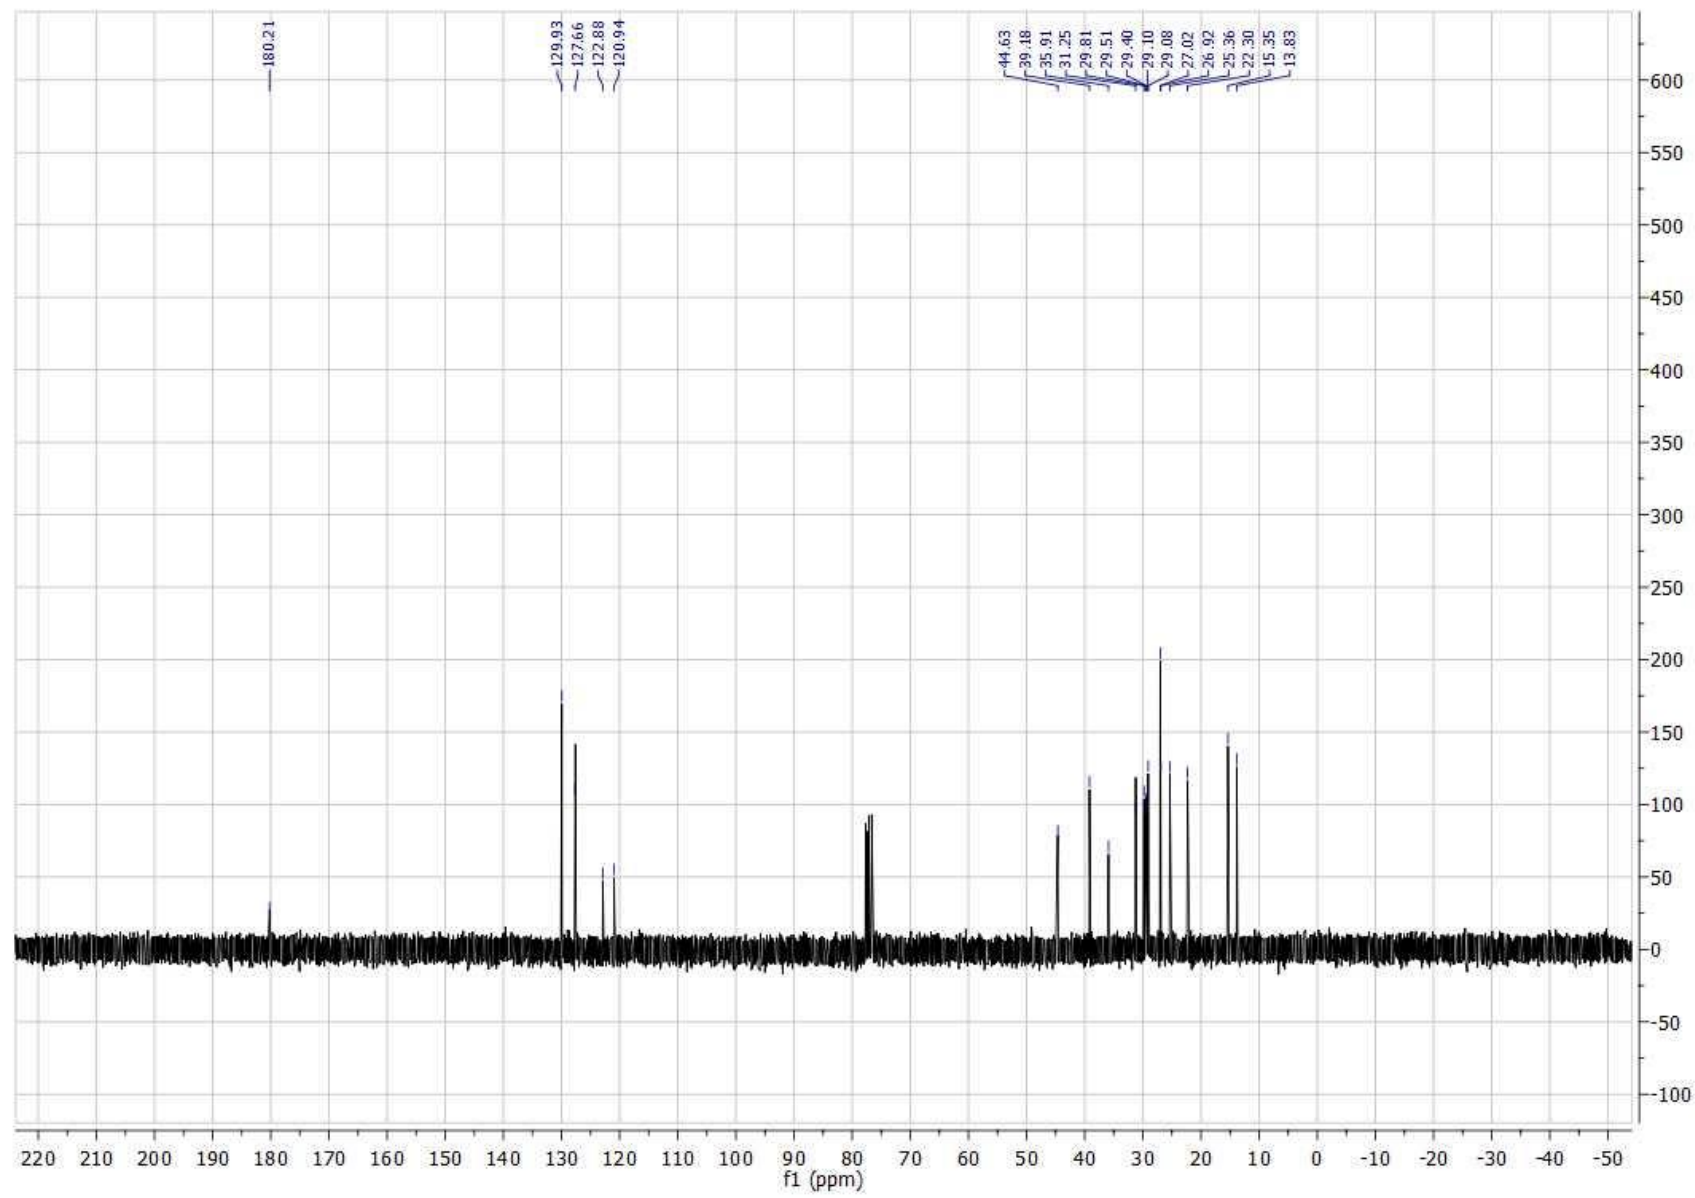

**Table S7.** Peak assignments and integrals of the <sup>1</sup>H-NMR spectrum of **4** at 25°C.

| [EMIM]                     | [C <sub>18:2</sub> ]           | δ (ppm)   | Shape | Integral |
|----------------------------|--------------------------------|-----------|-------|----------|
| C(2)H imidazolium          | -                              | 11,27     | s     | 0,21     |
| CHCl <sub>3</sub>          | -                              | 7,26      | s     | -        |
| C(4-5)H imidazolium        | -                              | 7,19      | t     | 2,00     |
| -                          | C(9,10,12,13)H                 | 5,36-5,14 | m     | 3,99     |
| C(1) H <sub>2</sub> chain  | -                              | 4,27      | tt    | 2,08     |
| C (1')H <sub>3</sub> chain | -                              | 3,96      | s     | 3,15     |
| MeOH                       | -                              | 3,26      | s     | -        |
| -                          | C(11)H <sub>2</sub>            | 2,67      | t     | 2,00     |
| -                          | C(2)H <sub>2</sub>             | 2,11      | t     | 2,15     |
| -                          | C(8,14)H <sub>2</sub>          | 2,01-1,84 | m     | 3,99     |
| -                          | C(3)H <sub>2</sub>             | 1,55      | p     | 2,18     |
| C(2) chainH <sub>3</sub>   | -                              | 1,45      | t     | 3,23     |
| -                          | C(4 to 7, 15-17)H <sub>2</sub> | 1,34-1,10 | m     | 14,56    |
| -                          | C(18)H <sub>3</sub>            | 0,79      | t     | 3,07     |

**Table S8.** Peak assignments of the <sup>13</sup>C-NMR spectrum of **4** at 25°C.

| [EMIM]                                | [C <sub>18:2</sub> ] | δ (ppm)    | [EMIM]                   | [C <sub>18:2</sub> ]   | δ (ppm)   |
|---------------------------------------|----------------------|------------|--------------------------|------------------------|-----------|
| -                                     | C(1)OO-              | 180,2      | -                        | C(chain)H <sub>2</sub> | 29,8-29,1 |
| C(2)H imidazolium                     | -                    | 130,0      | -                        | C(14)H <sub>2</sub>    | 27,0      |
| -                                     | C(9,10,12,13)H       | 127,7      | -                        | C(8)H <sub>2</sub>     | 26,9      |
| C(4)H imidazolium                     | -                    | 123,0'     | -                        | C(11)H <sub>2</sub>    | 25,4      |
| C(5)H imidazolium                     | -                    | 121,0      | -                        | C(17)H <sub>2</sub>    | 22,3      |
| CDCl <sub>3</sub> , CHCl <sub>3</sub> | -                    | 77.7-76.7, | C(2)H <sub>3</sub> chain | -                      | 15,4      |
| MeOD                                  | -                    | 77,2       | -                        | C(18)H <sub>3</sub>    | 13,9      |
| C(1) H <sub>2</sub> chain             | -                    | 49,0       | -                        |                        |           |
| -                                     | C(1)H <sub>2</sub>   | 44,7       |                          |                        |           |
| -                                     | C(1)H <sub>2</sub>   | 39,2       |                          |                        |           |
| C(1')H <sub>3</sub>                   | -                    | 35,9       |                          |                        |           |
| -                                     | C(16)H <sub>2</sub>  | 31,3       |                          |                        |           |

Fig S9:  $^1\text{H}$  NMR of **5** at 25  $^\circ\text{C}$

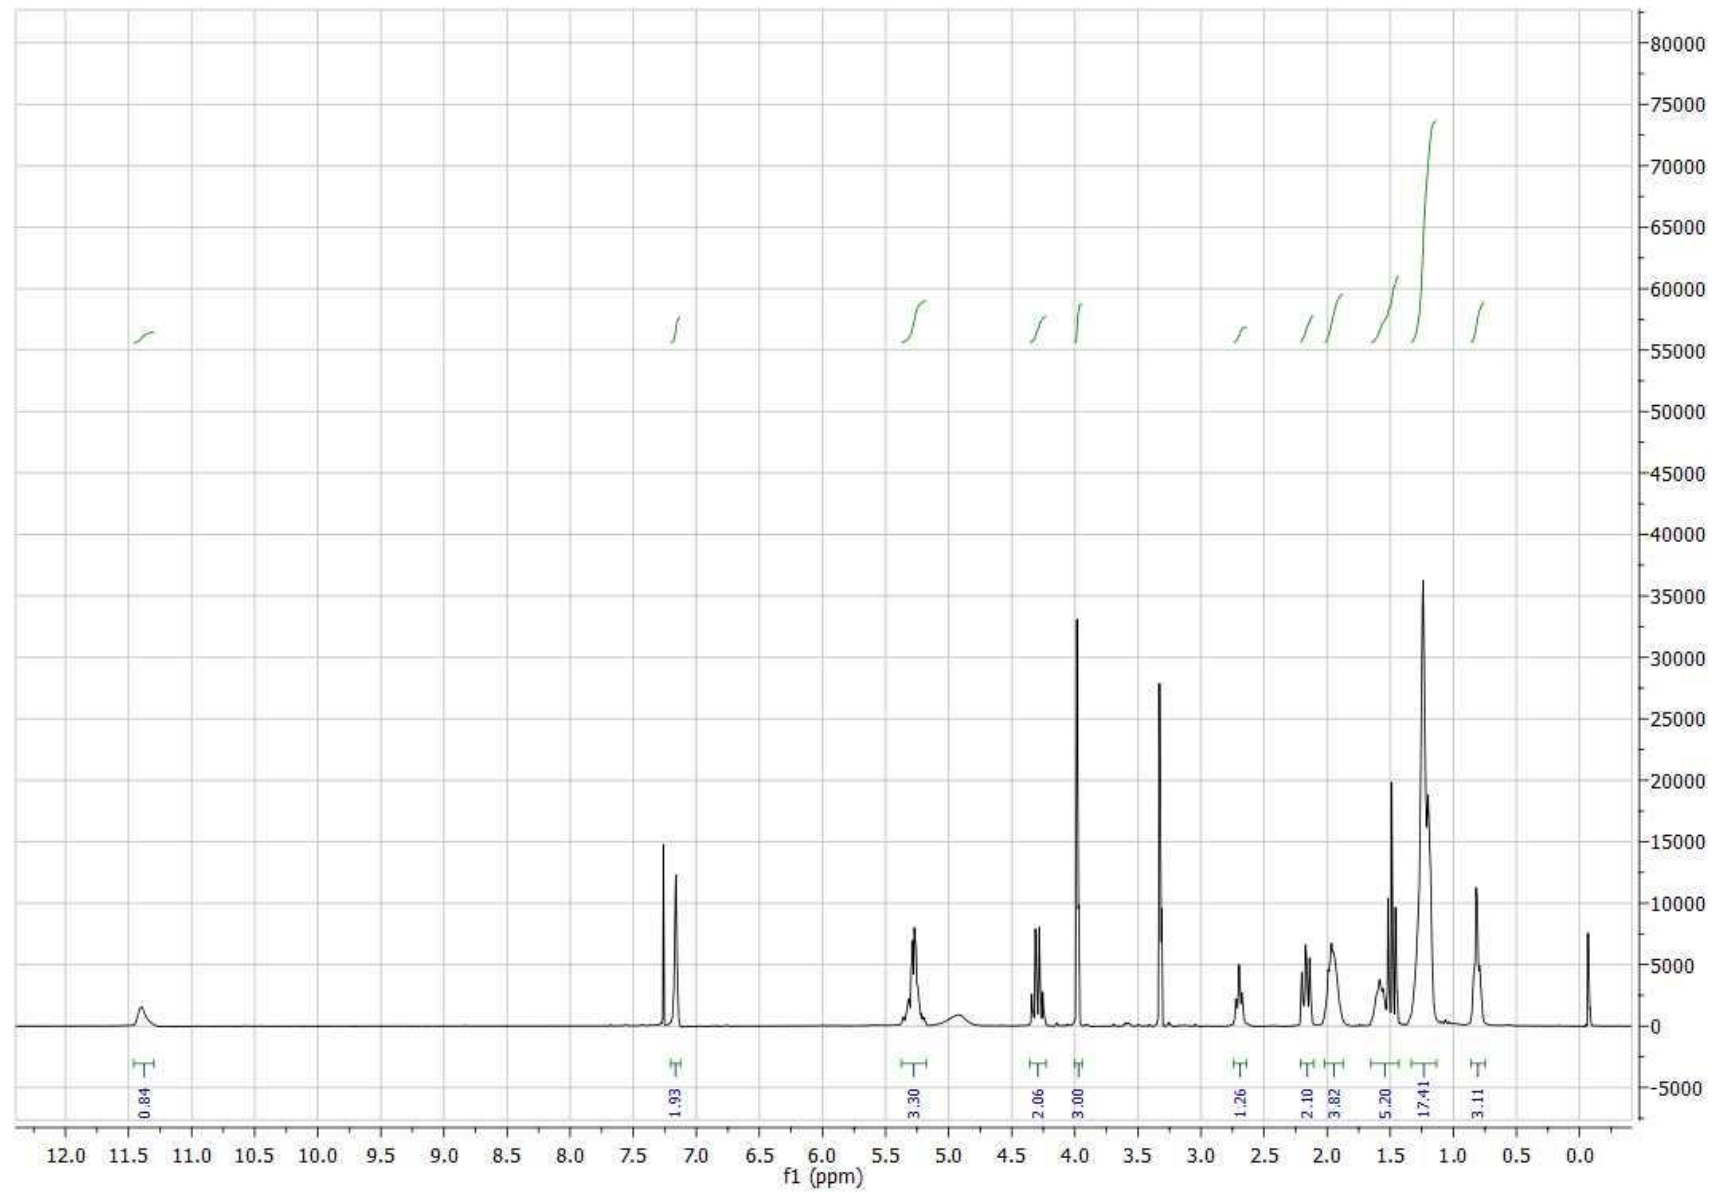

Fig S10:  $^{13}\text{C}$  NMR of **5** at 25 °C

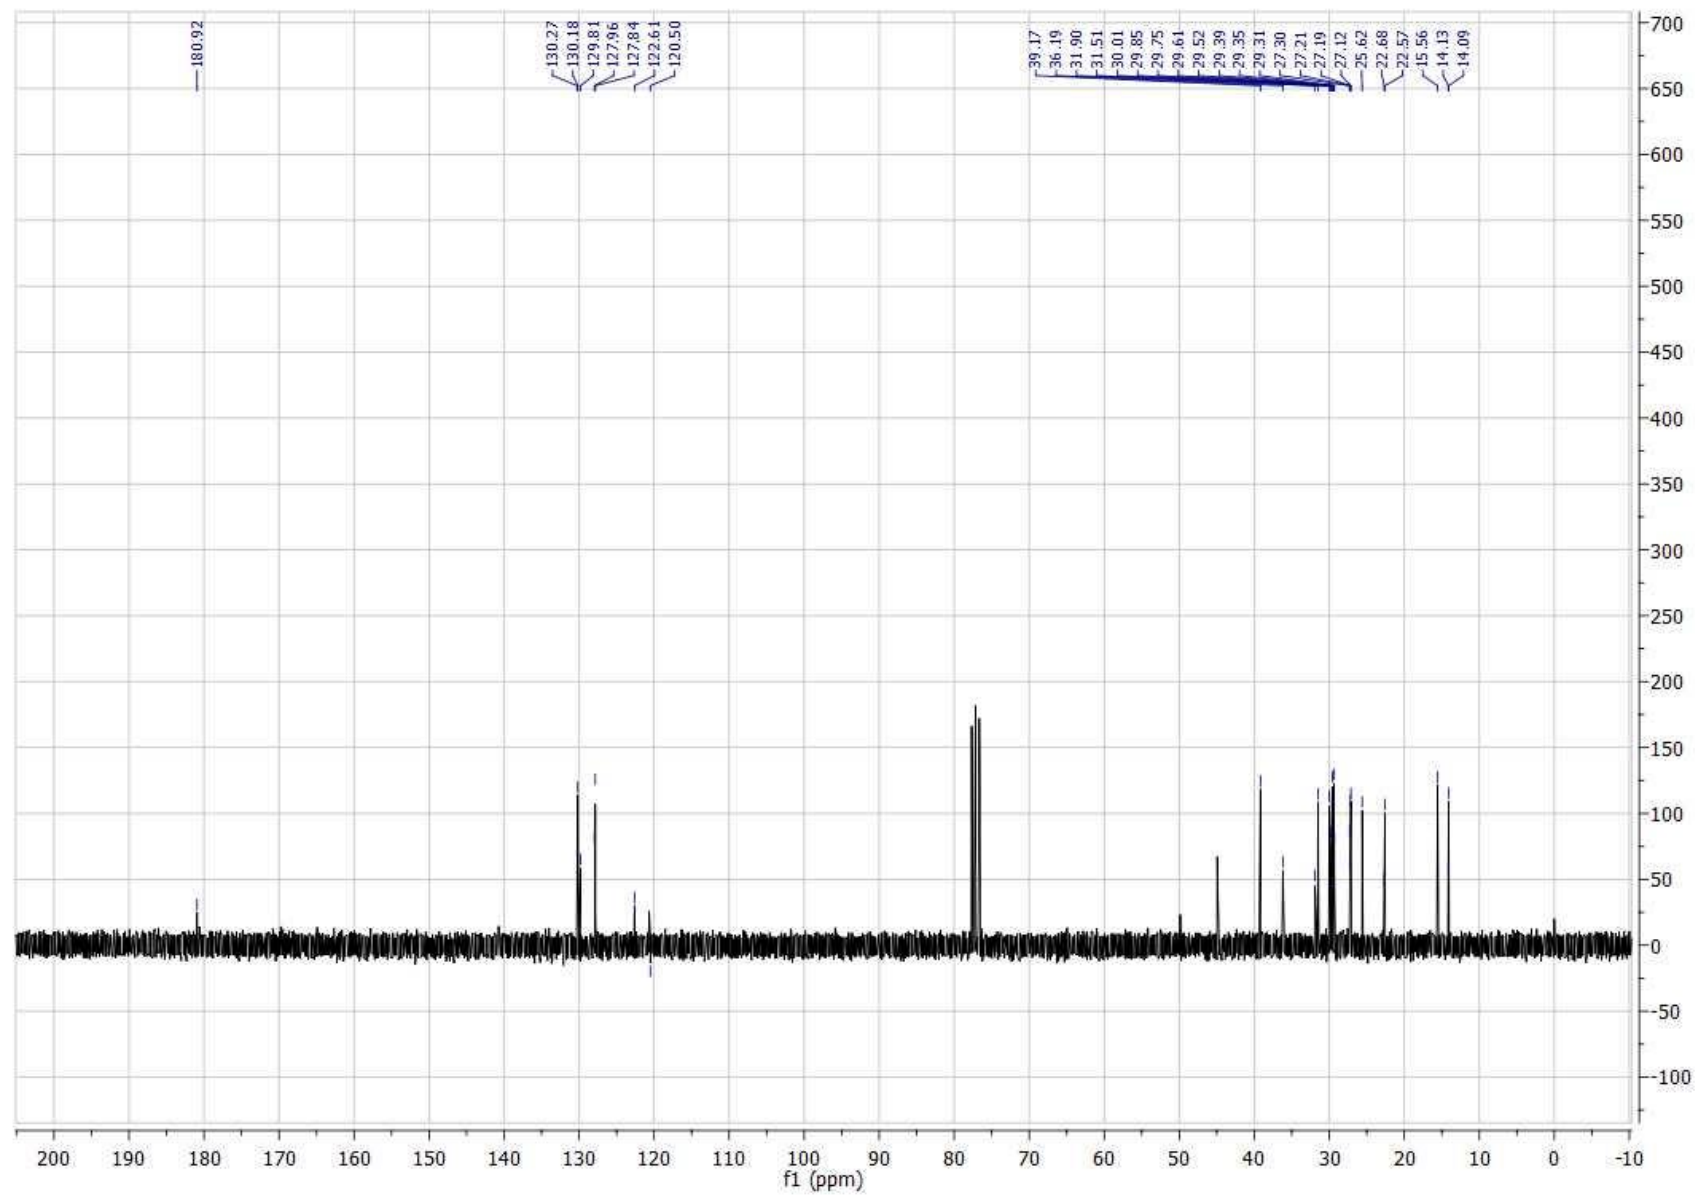

**Table S9.** Peak assignments and integrals of the <sup>1</sup>H-NMR spectrum of **5** at 25°C.

| [EMIM]                     | [C18:1-C18:2 30%-70%]          | δ (ppm)   | Shape | Integral |
|----------------------------|--------------------------------|-----------|-------|----------|
| C(2)H imidazolium          | -                              | 11,40     | s     | 0,84     |
| CHCl <sub>3</sub>          | -                              | 7,26      | s     | -        |
| C(4-5)H imidazolium        | -                              | 7,16      | s     | 1,93     |
| -                          | C(9,10,12,13)H                 | 5,37-5,17 | m     | 3,30     |
| C(1) H <sub>2</sub> chain  | -                              | 4,29      | tt    | 2,06     |
| C (1')H <sub>3</sub> chain | -                              | 3,98      | s     | 3,00     |
| MeOH                       | -                              | 3,26      | s     | -        |
| -                          | C(11)H <sub>2</sub>            | 2,70      | t     | 1,26     |
| -                          | C(2)H <sub>2</sub>             | 2,17      | t     | 2,10     |
| -                          | C(8,14)H <sub>2</sub>          | 2,04-1,86 | m     | 3,82     |
| -                          | C(3)H <sub>2</sub>             | 1,58      | p     | 2,03     |
| C(2) chainH <sub>3</sub>   | -                              | 1,49      | t     | 3,17     |
| -                          | C(4 to 8, 15-17)H <sub>2</sub> | 1,36-1,12 | m     | 17,41    |
| -                          | C(18)H <sub>3</sub>            | 0,80      | t     | 3,11     |

**Table S10.** Peak assignments of the <sup>13</sup>C-NMR spectrum of **5** at 25°C.

| [EMIM]                                | [C18:1-C18:2 30%-70%] | δ (ppm)            | [EMIM]                   | [C18:1-C18:2 30%-70%]  | δ (ppm)   |
|---------------------------------------|-----------------------|--------------------|--------------------------|------------------------|-----------|
| -                                     | C(1)OO-               | 180,9              | -                        | C(chain)H <sub>2</sub> | 30,0-29,3 |
| C(2)H imidazolium                     | -                     | 130,0              | -                        | C(14)H <sub>2</sub>    | 27,3      |
| -                                     | C(9,10,12,13)H        | 128,0-127,8        | -                        | C(8)H <sub>2</sub>     | 27,1      |
| C(4)H imidazolium                     | -                     | 122,6              | -                        | C(11)H <sub>2</sub>    | 25,6      |
| C(5)H imidazolium                     | -                     | 120,5              | -                        | C(17)H <sub>2</sub>    | 22,6      |
| CDCl <sub>3</sub> , CHCl <sub>3</sub> | -                     | 77.7-76.7,<br>77.2 | C(2)H <sub>3</sub> chain | -                      | 15,6      |
| MeOD                                  | -                     | 49,0               | -                        | C(18)H <sub>3</sub>    | 14,1      |
| C(1) H <sub>2</sub> chain             | -                     | 44,9               | -                        |                        |           |
| -                                     | C(1)H <sub>2</sub>    | 39,2               |                          |                        |           |
| C(1')H <sub>3</sub>                   | -                     | 36,2               |                          |                        |           |
| -                                     |                       | 31,9               |                          |                        |           |
| -                                     | C(16)H <sub>2</sub>   | 31,5               |                          |                        |           |



Fig S11:  $^1\text{H}$  NMR of **6** at 25 °C

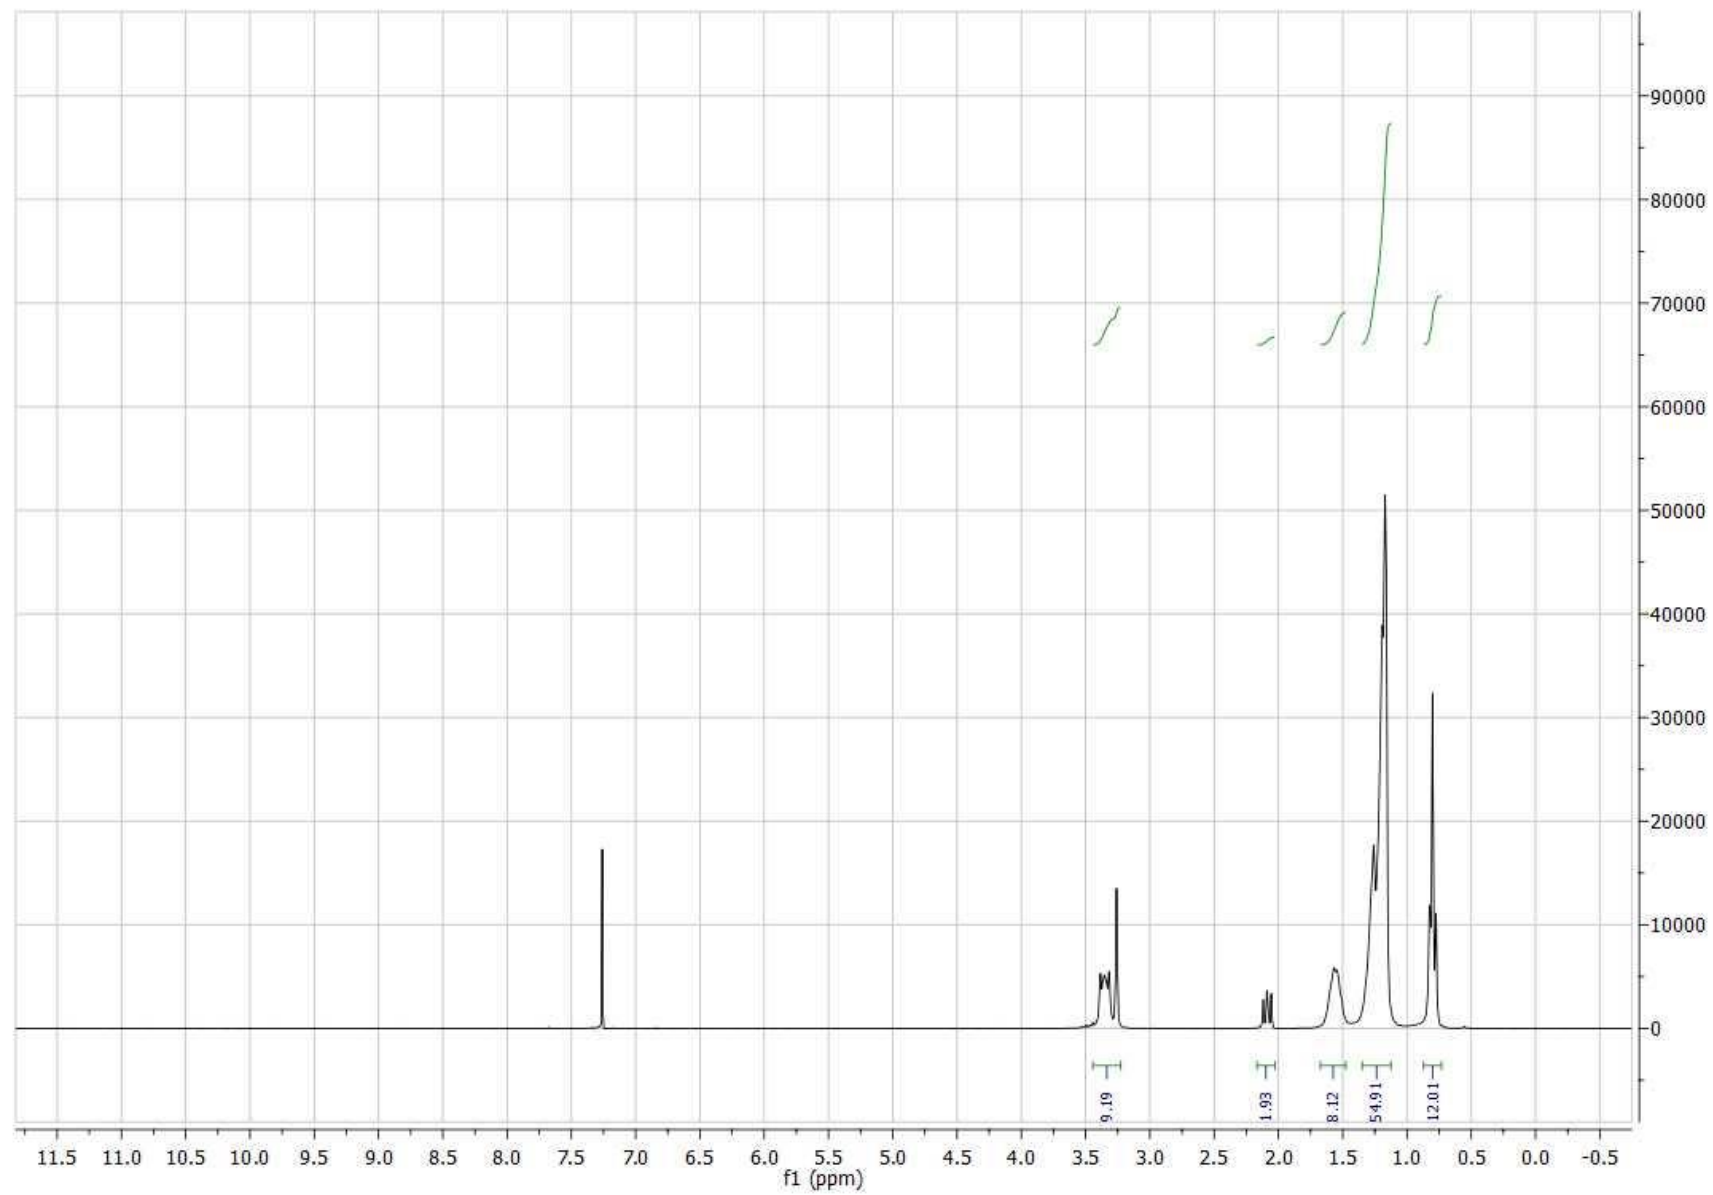

Fig S12:  $^{13}\text{C}$  NMR of 6 at 25 °C

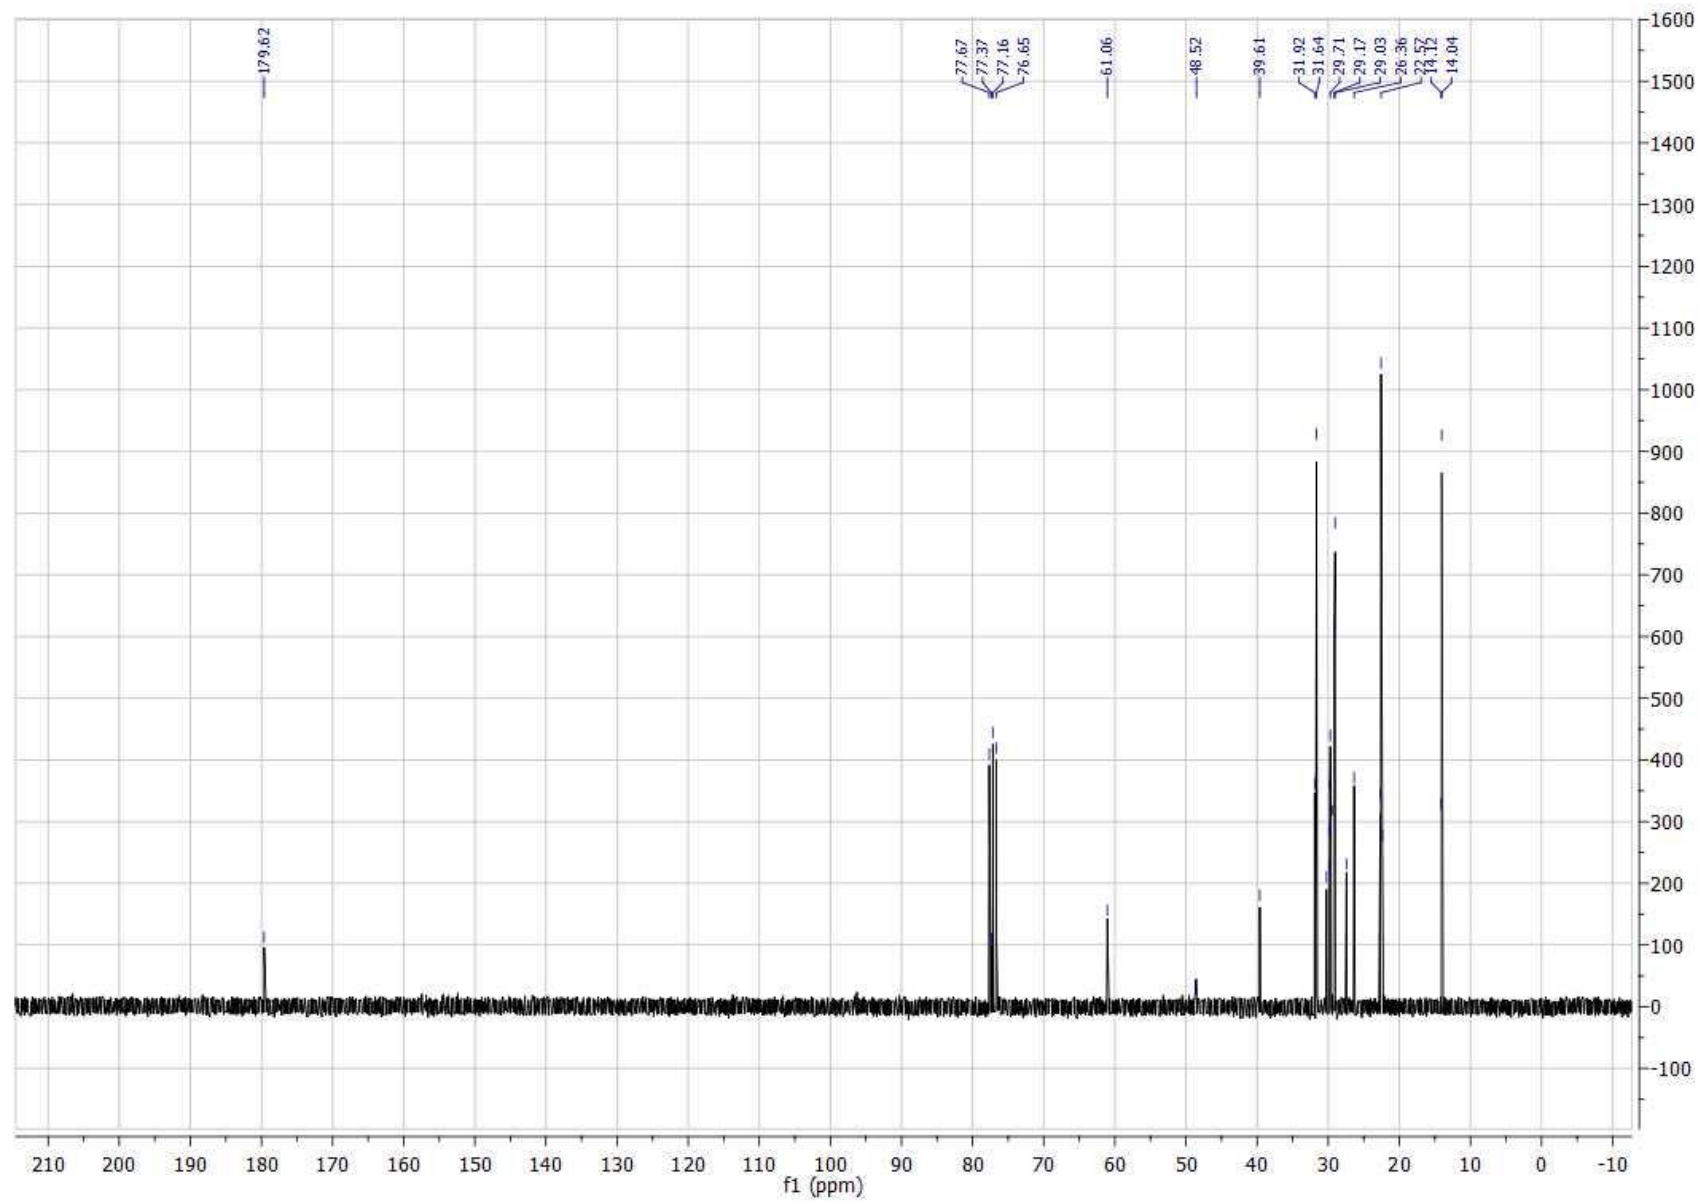

**Table S11.** Peak assignments and integrals of the <sup>1</sup>H-NMR spectrum of **6** at 25°C.

| [N <sub>8881</sub> ]               | [C <sub>16</sub> ]    | δ (ppm)     | Shape | Integral |
|------------------------------------|-----------------------|-------------|-------|----------|
| CHCl <sub>3</sub>                  |                       |             | s     | -        |
| H <sub>2</sub> O                   |                       |             |       |          |
| C(1,1',1'')H <sub>2</sub>          | -                     | 3,48-3,26   | m     | 9,19     |
| C(1''')H <sub>3</sub>              | -                     | 3,29        | s     |          |
| -                                  | C(2)H <sub>2</sub>    | 2,15        | t     | 1,93     |
| C(3,3',3'')H <sub>2</sub>          | C(3)H <sub>2</sub>    | 1,70 - 1,51 | m     | 8,12     |
| C(4-7,4'-7',4''-7'')H <sub>2</sub> | C(4-15)H <sub>2</sub> | 1,42 - 1,10 | m     | 54,91    |
| C(8,8',8'')H <sub>3</sub>          | C(16)H <sub>3</sub>   | 0,85 - 0,70 | m     | 12,01    |

**Table S12.** Peak assignments of the <sup>13</sup>C-NMR spectrum of **6** at 25°C.

| [N <sub>8881</sub> ]                  | [C <sub>16</sub> ]    | δ (ppm)            | [N <sub>8881</sub> ]      | [C <sub>16</sub> ]  | δ (ppm)   |
|---------------------------------------|-----------------------|--------------------|---------------------------|---------------------|-----------|
| -                                     | C(1)OO-               | 179,6              | C(5,5',5'')H <sub>2</sub> |                     | 28,8      |
| CDCl <sub>3</sub> , CHCl <sub>3</sub> |                       | 77,5-76,6,<br>77,3 | -                         | C(3)H <sub>2</sub>  | 27,1      |
| C(1,1',1'')H <sub>2</sub>             | -                     | 61,1               | C(3,3',3'')H <sub>2</sub> | -                   | 26,4      |
| C(1''')H <sub>3</sub>                 | -                     | 48,5               | -                         | C(15)H <sub>2</sub> | 22,5      |
| -                                     | C(2)H <sub>2</sub>    | 39,6               | C(7,7',7'')H <sub>2</sub> | -                   | 22,3-22,1 |
| -                                     | C(14)H <sub>2</sub>   | 31,9               | -                         | C(16)H <sub>3</sub> | 14,1      |
| C(6,6',6'')H <sub>2</sub>             |                       | 31,6               | C(8,8',8'')H <sub>2</sub> | -                   | 14,0      |
| -                                     | C(4-13)H <sub>2</sub> | 29,7-29,0          |                           |                     |           |
| C(4,4',4'')H <sub>2</sub>             | -                     | 28,9               |                           |                     |           |

Fig S13:  $^1\text{H}$  NMR of **7** at 25  $^\circ\text{C}$

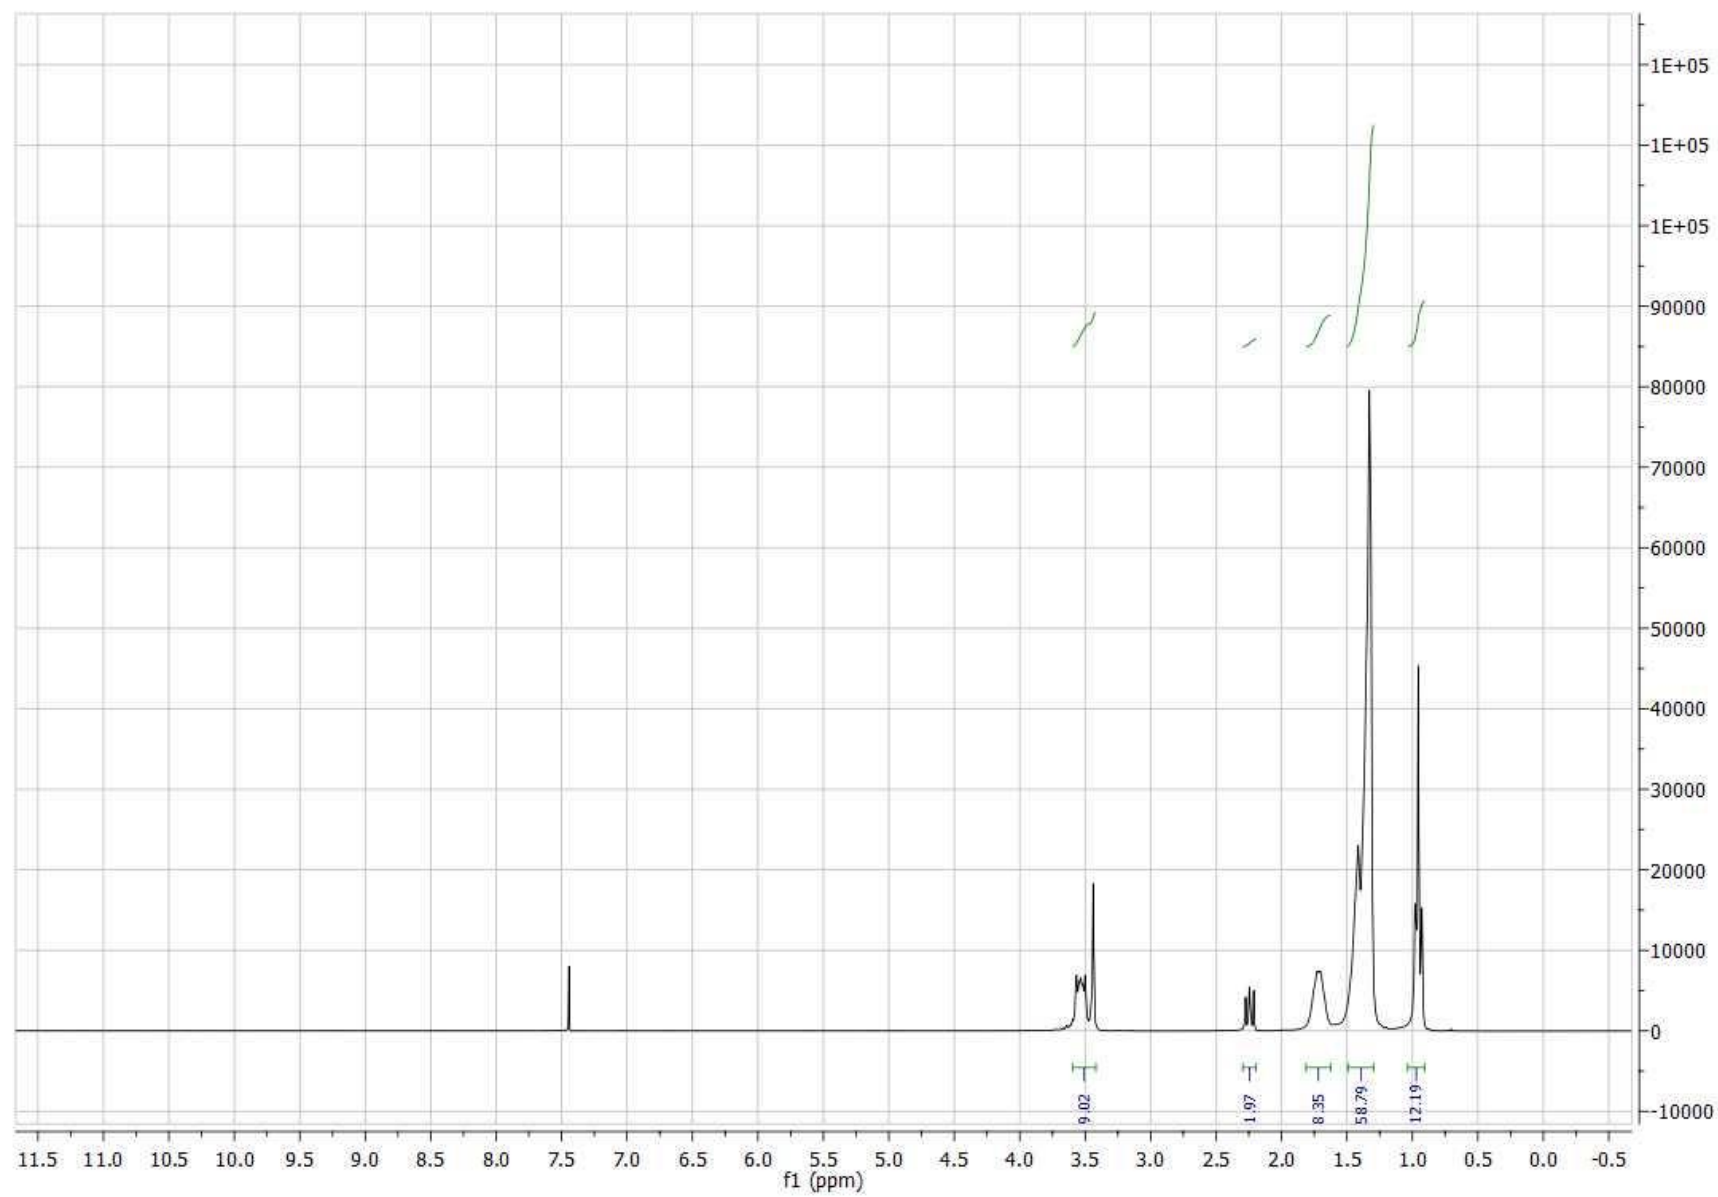

Fig S14:  $^{13}\text{C}$  NMR of **7** at 25 °C

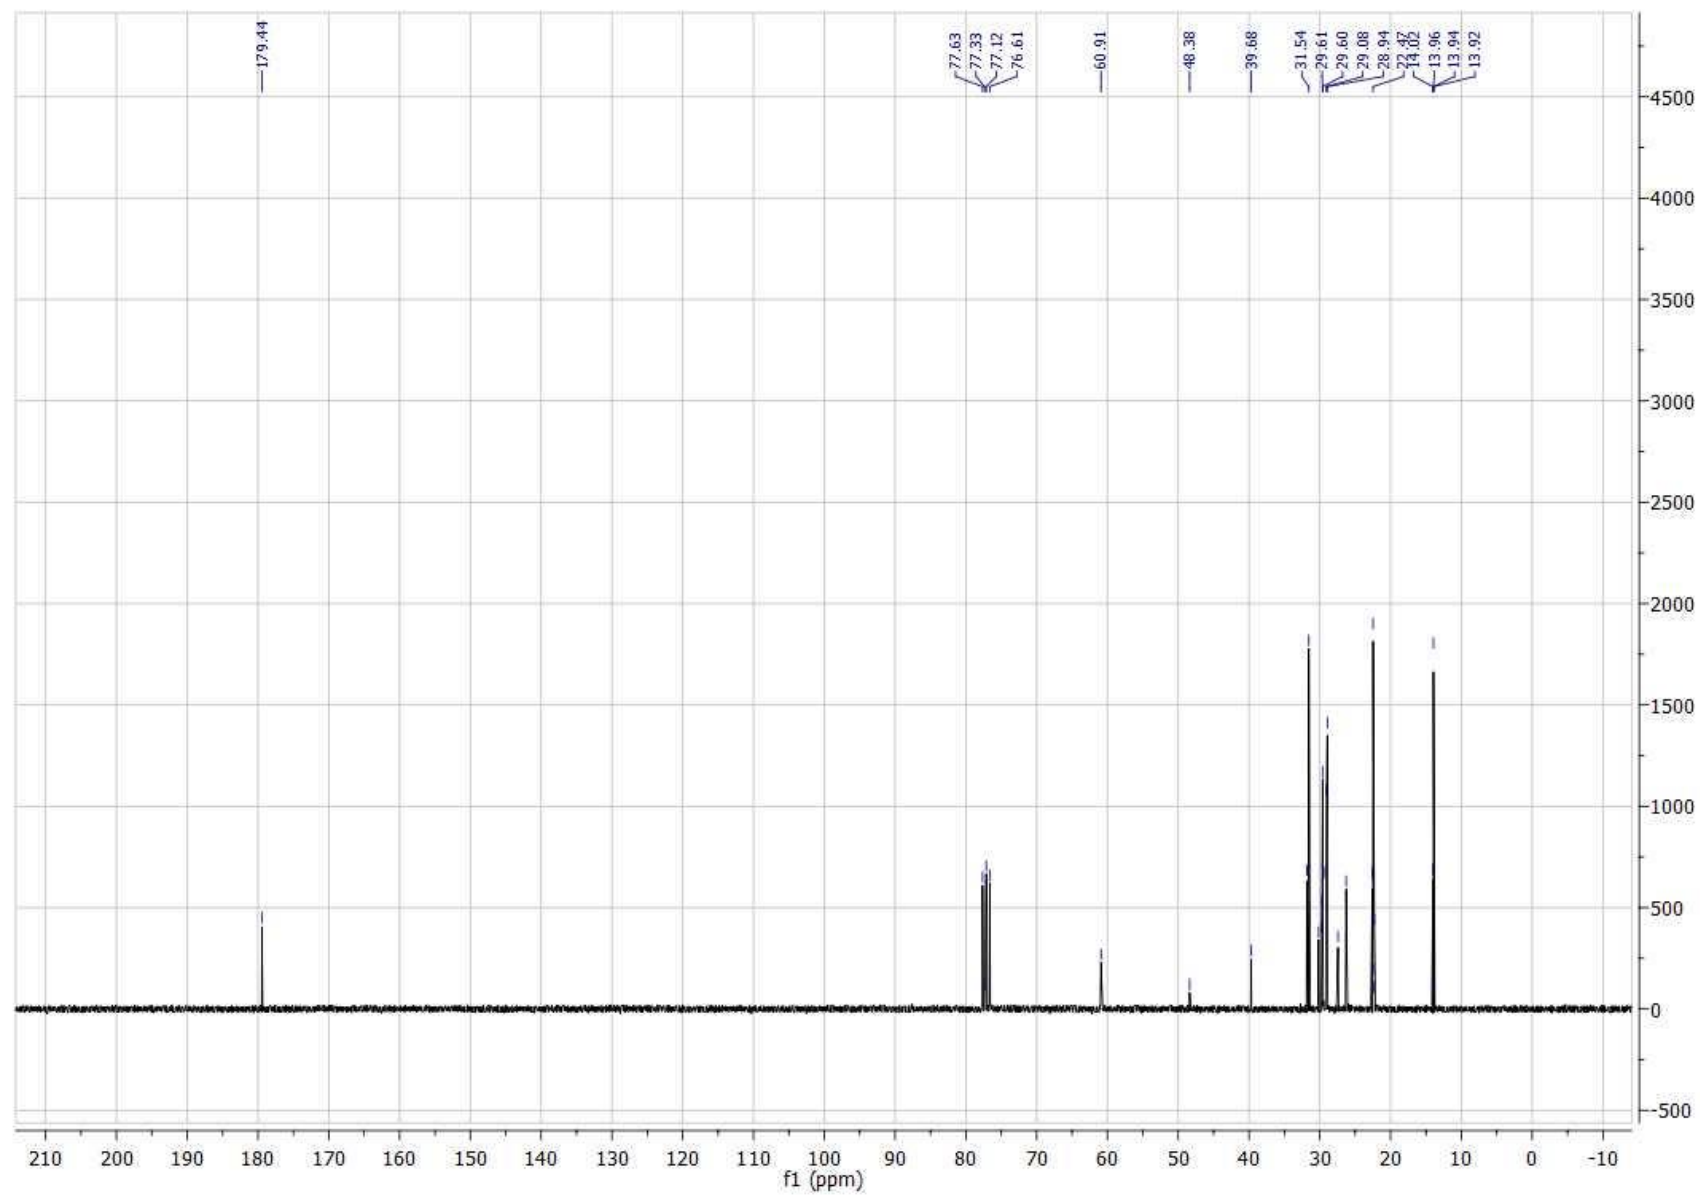

**Table S13.** Peak assignments and integrals of the <sup>1</sup>H-NMR spectrum of **7** at 25°C.

| [N <sub>8881</sub> ]               | [C <sub>18</sub> ]    | δ (ppm)   | Shape | Integral |
|------------------------------------|-----------------------|-----------|-------|----------|
| CHCl <sub>3</sub>                  |                       |           | s     | -        |
| H <sub>2</sub> O                   |                       |           |       |          |
| C(1,1',1'')H <sub>2</sub>          | -                     | 3,58-3,31 | m     | 9,02     |
| C(1''')H <sub>3</sub>              | -                     | 3,29      | s     |          |
| -                                  | C(2)H <sub>2</sub>    | 2,15      | t     | 1,97     |
| C(3,3',3'')H <sub>2</sub>          | C(3)H <sub>2</sub>    | 1,78-1,57 | m     | 8,35     |
| C(4-7,4'-7',4''-7'')H <sub>2</sub> | C(4-17)H <sub>2</sub> | 1,52-1,20 | m     | 58,79    |
| C(8,8',8'')H <sub>3</sub>          | C(18)H <sub>3</sub>   | 1,05-0,70 | m     | 12,19    |

**Table S14.** Peak assignments of the <sup>13</sup>C-NMR spectrum of **7** at 25°C.

| [N <sub>8881</sub> ]                  | [C <sub>18</sub> ]    | δ (ppm)            | [N <sub>8881</sub> ]      | [C <sub>18</sub> ]  | δ (ppm) |
|---------------------------------------|-----------------------|--------------------|---------------------------|---------------------|---------|
| -                                     | C(1)OO-               | 179,4              | C(5,5',5'')H <sub>2</sub> |                     | 28,9    |
|                                       |                       |                    | -                         | C(3)H <sub>2</sub>  | 27,2    |
|                                       |                       |                    | C(3,3',3'')H <sub>2</sub> | -                   | 26,2    |
|                                       |                       |                    | -                         | C(17)H <sub>2</sub> | 22,5    |
| CDCl <sub>3</sub> , CHCl <sub>3</sub> |                       | 77,5-76,6,<br>77,3 |                           |                     |         |
| C(1,1',1'')H <sub>2</sub>             | -                     | 60,9               | C(7,7',7'')H <sub>2</sub> | -                   | 22,5    |
| C(1''')H <sub>3</sub>                 | -                     | 48,4               |                           |                     | -22,4   |
| -                                     | C(2)H <sub>2</sub>    | 39,7               | -                         | C(18)H <sub>3</sub> | 14,0    |
| -                                     | C(16)H <sub>2</sub>   | 31,7               | C(8,8',8'')H <sub>2</sub> | -                   | 13,9    |
| C(6,6',6'')H <sub>2</sub>             |                       | 31,5               |                           |                     |         |
| -                                     | C(4-15)H <sub>2</sub> | 29,6-29,1          |                           |                     |         |
| C(4,4',4'')H <sub>2</sub>             | -                     | 29,0               |                           |                     |         |

Fig S15:  $^1\text{H}$  NMR of **8** at 25 °C

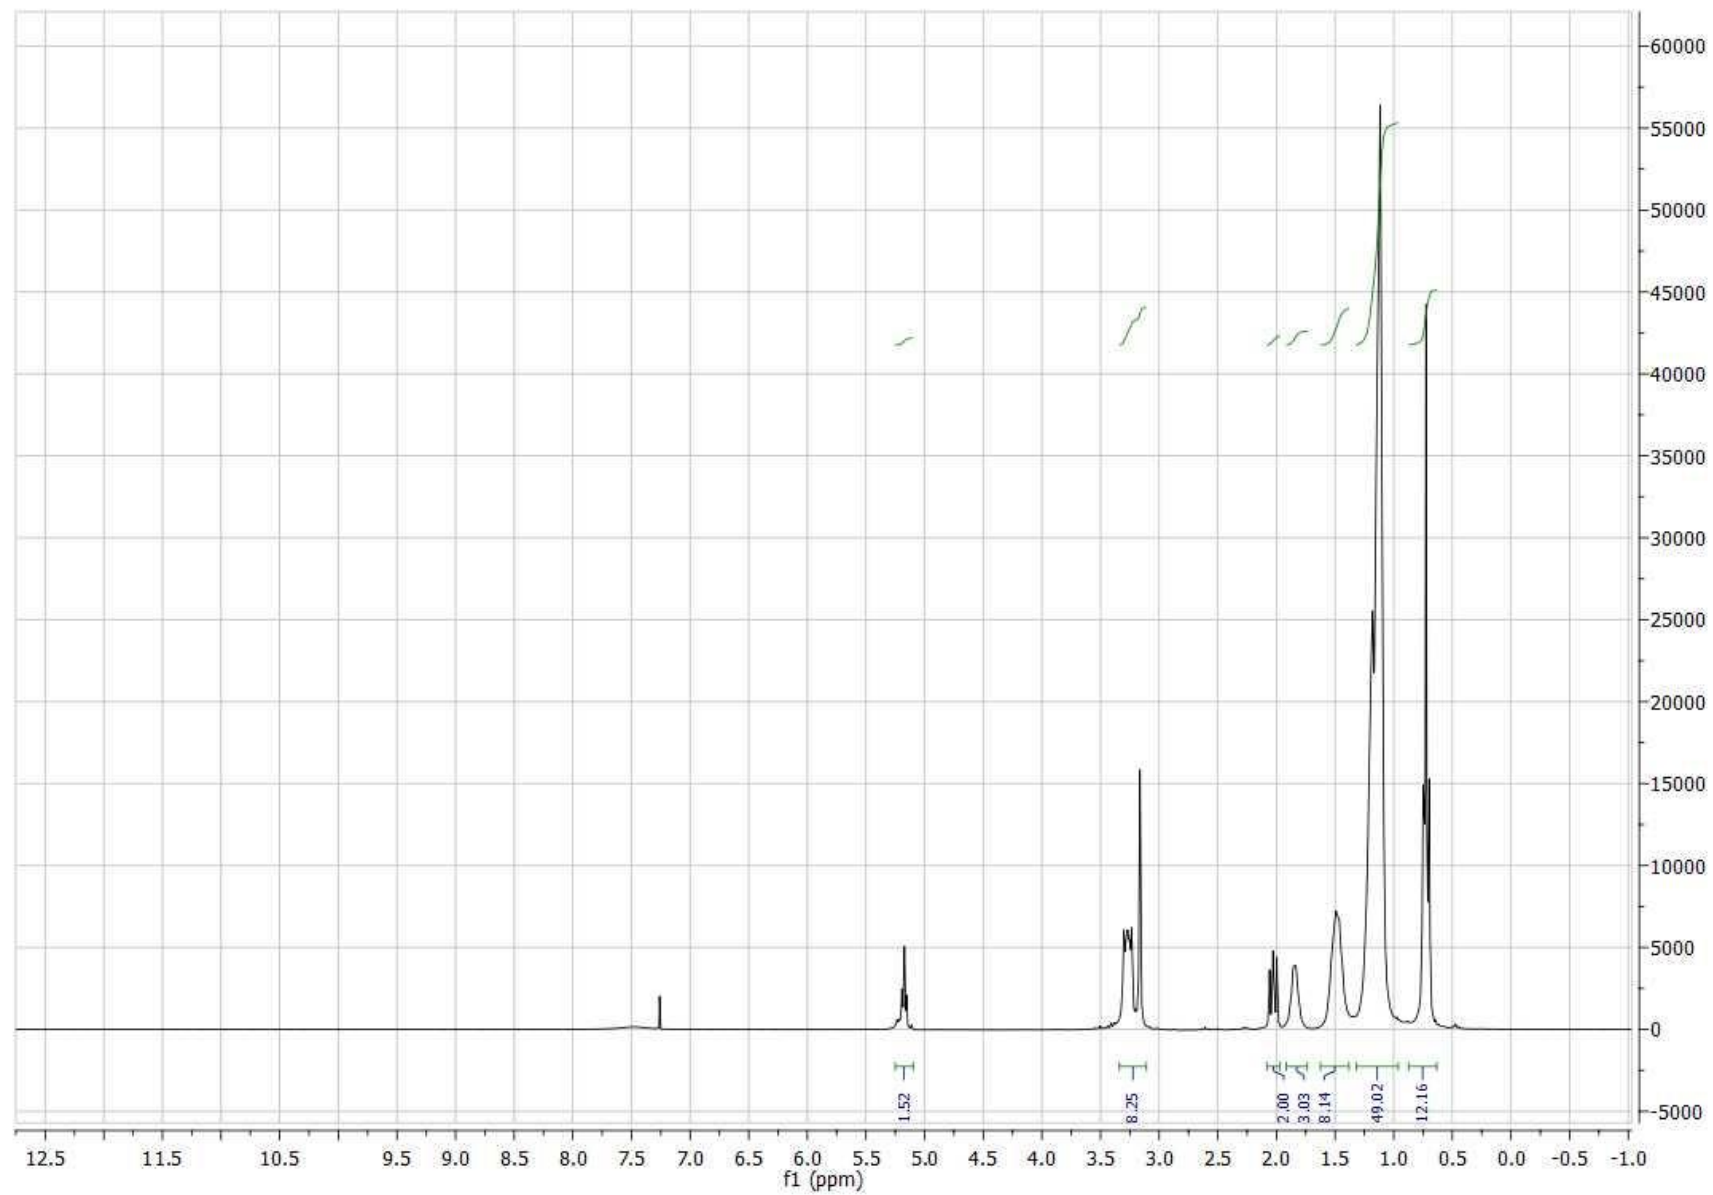

Fig S16:  $^{13}\text{C}$  NMR of **8** at 25 °C

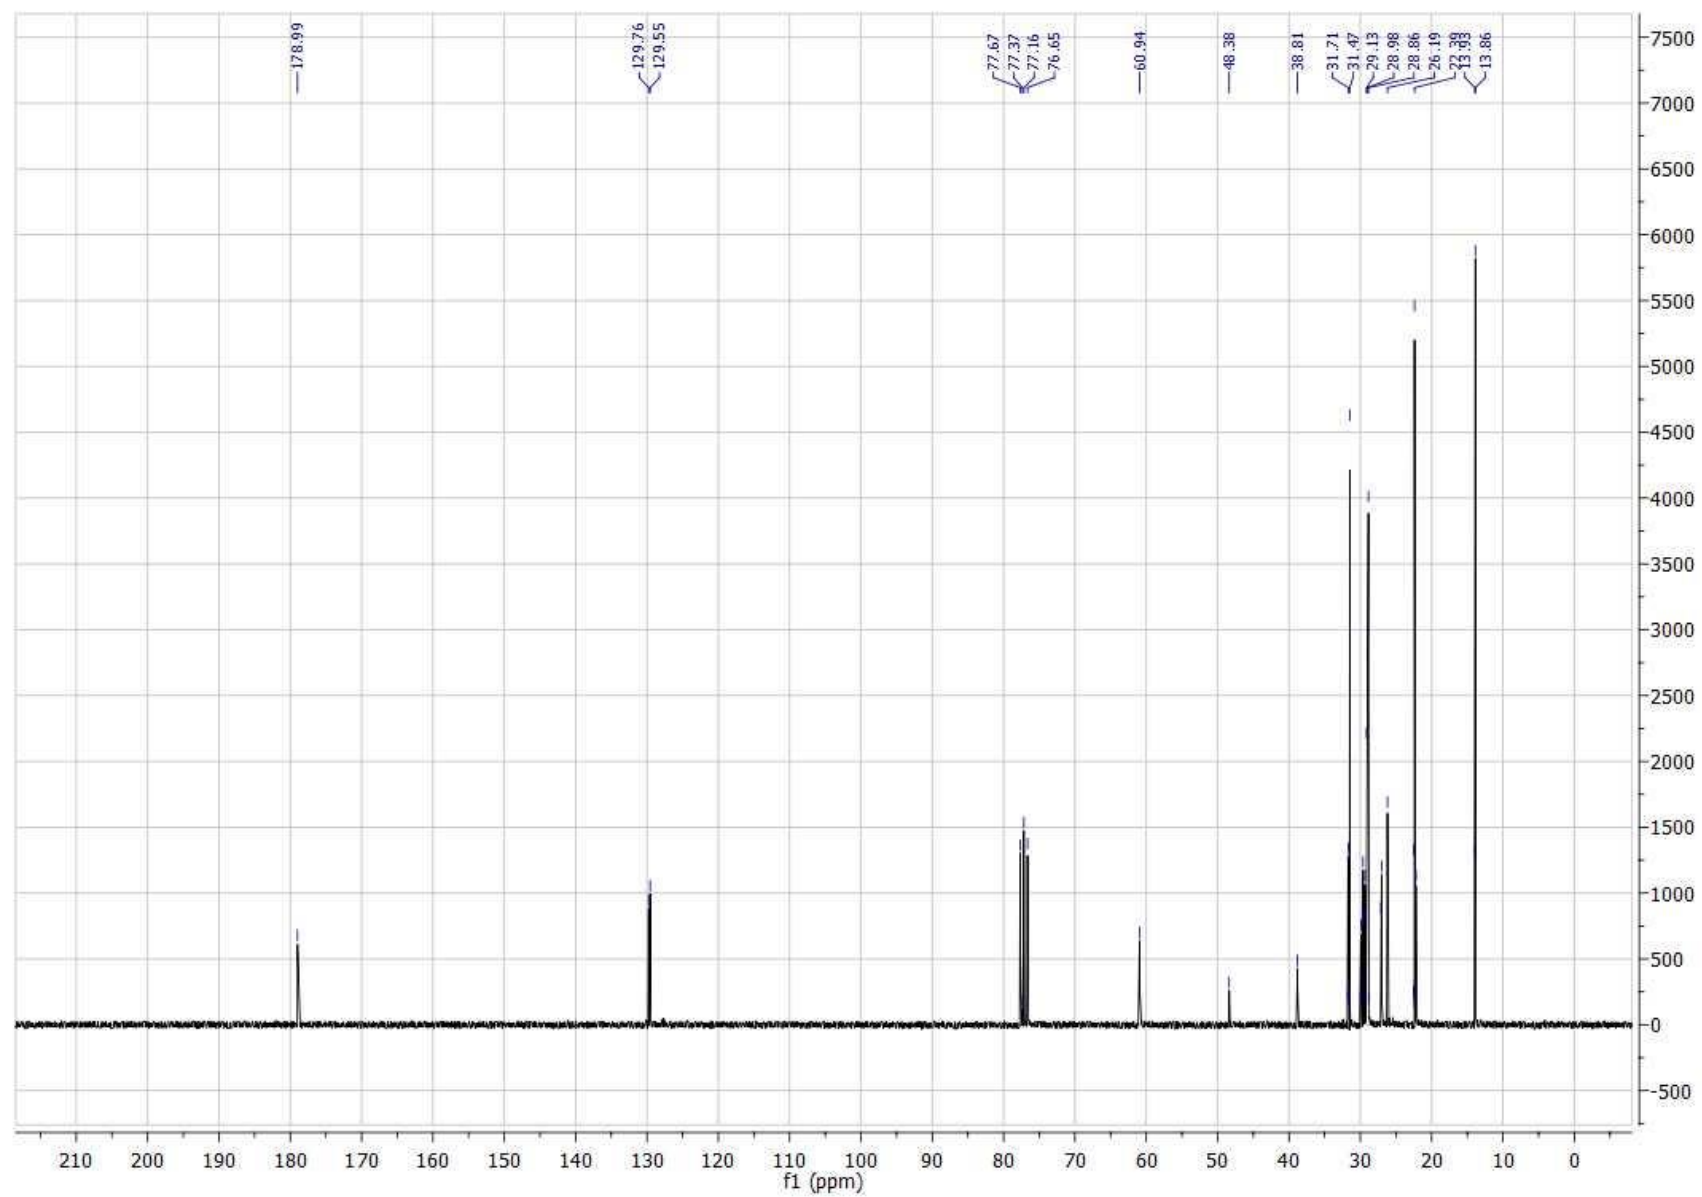



**Table S15.** Peak assignments and integrals of the <sup>1</sup>H-NMR spectrum of **8** at 25°C.

| [N <sub>8881</sub> ]                  | [C18:1 tested according to Ph.Eur.] | δ (ppm)     | Shape | Integral |
|---------------------------------------|-------------------------------------|-------------|-------|----------|
| CHCl <sub>3</sub>                     |                                     |             | s     | -        |
| -                                     | C(9,10)                             | 5,26-5,11   | m     | 1,52     |
| H <sub>2</sub> O                      |                                     |             |       |          |
| C(1,1',1'')H <sub>2</sub>             | -                                   | 3,36-3,17   | m     | 8,25     |
| C(1''')H <sub>3</sub>                 | -                                   | 3,16        |       |          |
| -                                     | C(2)H <sub>2</sub>                  | 2,03        | t     | 2,00     |
| -                                     | C(8,11)H <sub>2</sub>               | 1,91 - 1,74 | m     | 3,03     |
| C(3,3',3'')H <sub>2</sub>             | C(3)H <sub>2</sub>                  | 1,62 - 1,36 | m     | 8,14     |
| C(4-7,4'-7'',4'''-7''')H <sub>2</sub> | C(4-7,12-17)H <sub>2</sub>          | 1,31 - 0,95 | m     | 49,02    |
| C(8,8',8'')H <sub>3</sub>             | C(18)H <sub>3</sub>                 | 0,85-0,55   | m     | 12,16    |

**Table S16.** Peak assignments of the <sup>13</sup>C-NMR spectrum of **8** at 25°C.

| [N <sub>8881</sub> ]                  | [C18:1 tested according to Ph.Eur.] | δ (ppm)            | [N <sub>8881</sub> ]      | [C18:1 tested according to Ph.Eur.] | δ (ppm) |
|---------------------------------------|-------------------------------------|--------------------|---------------------------|-------------------------------------|---------|
| -                                     | C(1)OO-                             | 179,0              | C(5,5',5'')H <sub>2</sub> |                                     | 28,9    |
| -                                     | C(10)H <sub>2</sub>                 | 129,8              | -                         | C(8)H <sub>2</sub>                  | 27,1    |
| -                                     | C(11)H <sub>2</sub>                 | 129,6              | -                         | C(3)H <sub>2</sub>                  | 27,0    |
| CDCl <sub>3</sub> , CHCl <sub>3</sub> |                                     | 77,5-76.6,<br>77,3 | -                         | C(11)H <sub>2</sub>                 | 27,0    |
| C(1,1',1'')H <sub>2</sub>             | -                                   | 60,9               | C(3,3',3'')H <sub>2</sub> | -                                   | 26,2    |
| C(1''')H <sub>3</sub>                 | -                                   | 48,4               | -                         | C(17)H <sub>2</sub>                 | 22,5    |
| -                                     | C(2)H <sub>2</sub>                  | 38,8               | C(7,7',7'')H <sub>2</sub> | -                                   | 22,4    |
| -                                     | C(16)H <sub>2</sub>                 | 31,7               | -                         | C(18)H <sub>3</sub>                 | 13,9    |
| C(6,6',6'')H <sub>2</sub>             |                                     | 31,5               | C(8,8',8'')H <sub>2</sub> | -                                   | 13,9    |
| -                                     | C(4-7,12-16)H <sub>2</sub>          | 30,0-29,1          |                           |                                     |         |
| C(4,4',4'')H <sub>2</sub>             | -                                   | 29,0               |                           |                                     |         |

Fig S17:  $^1\text{H}$  NMR of **9** at 25 °C

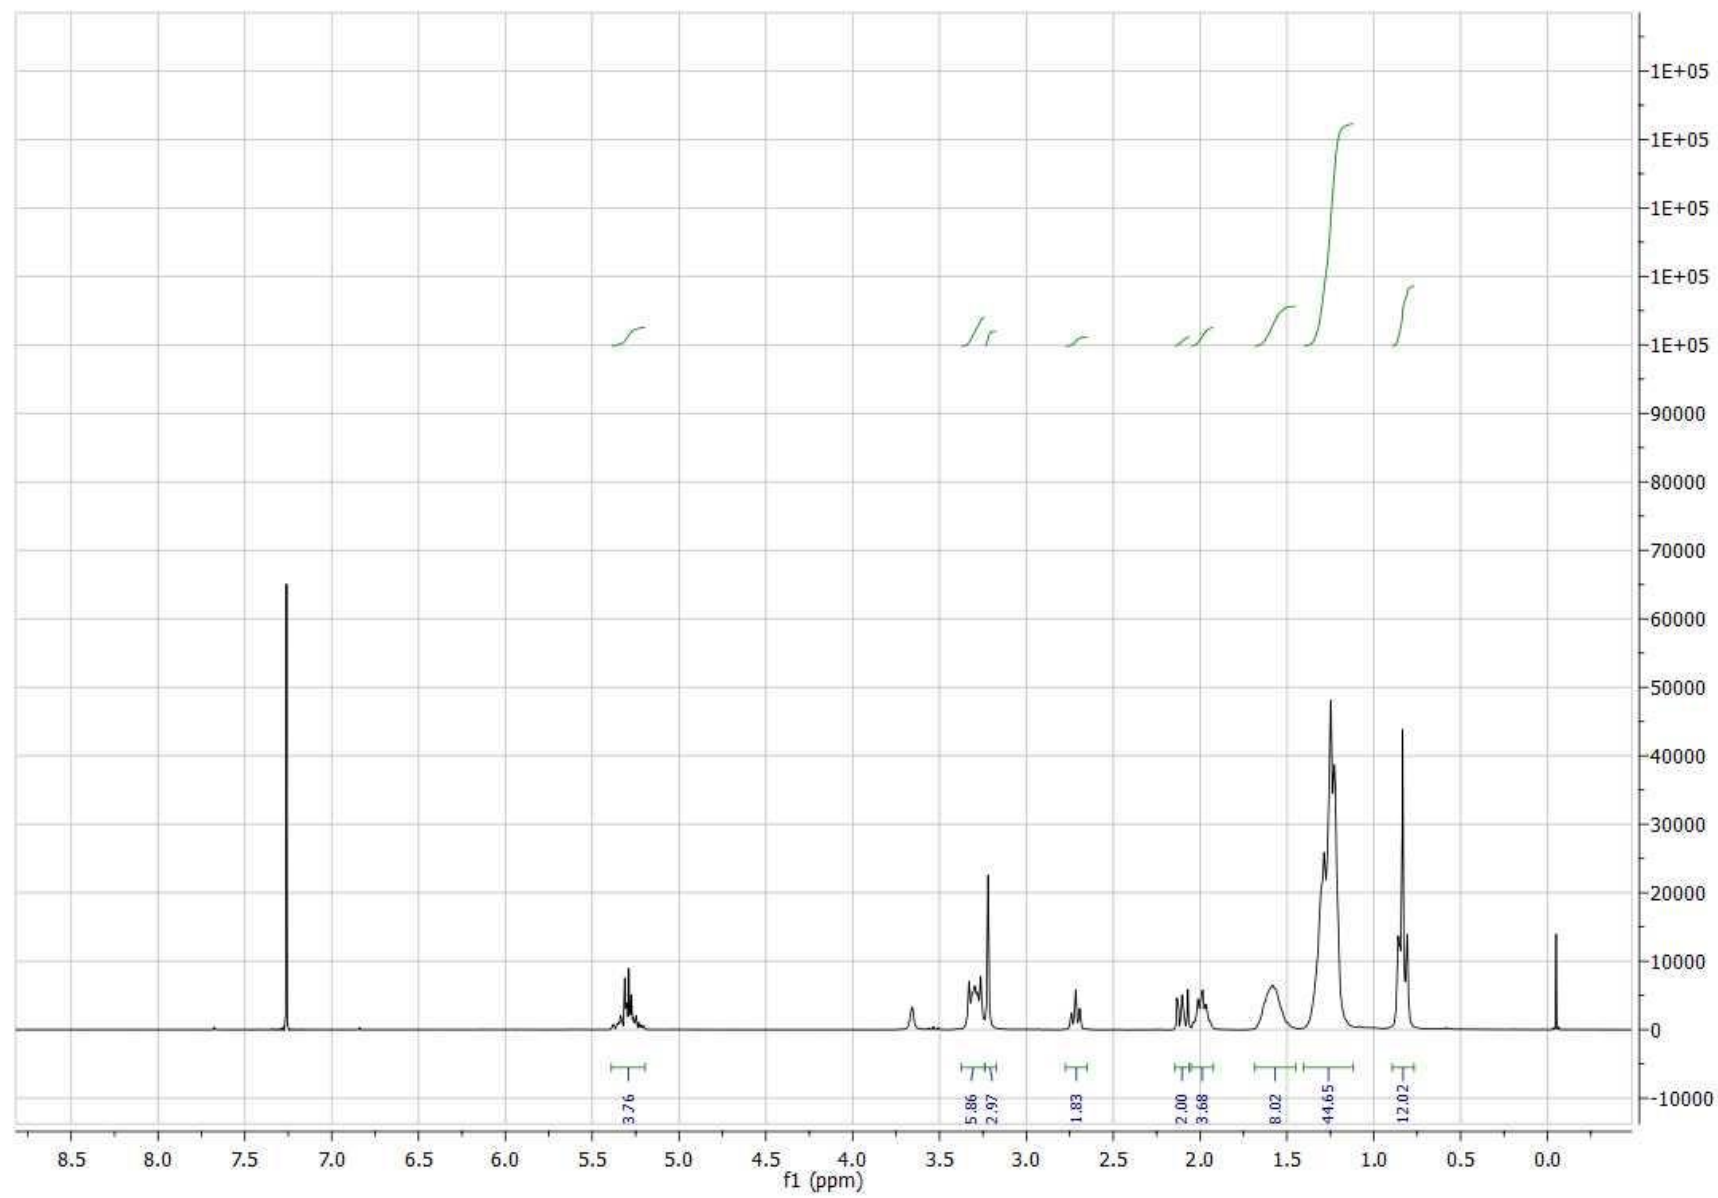

Fig S18:  $^{13}\text{C}$  NMR of **9** at 25 °C

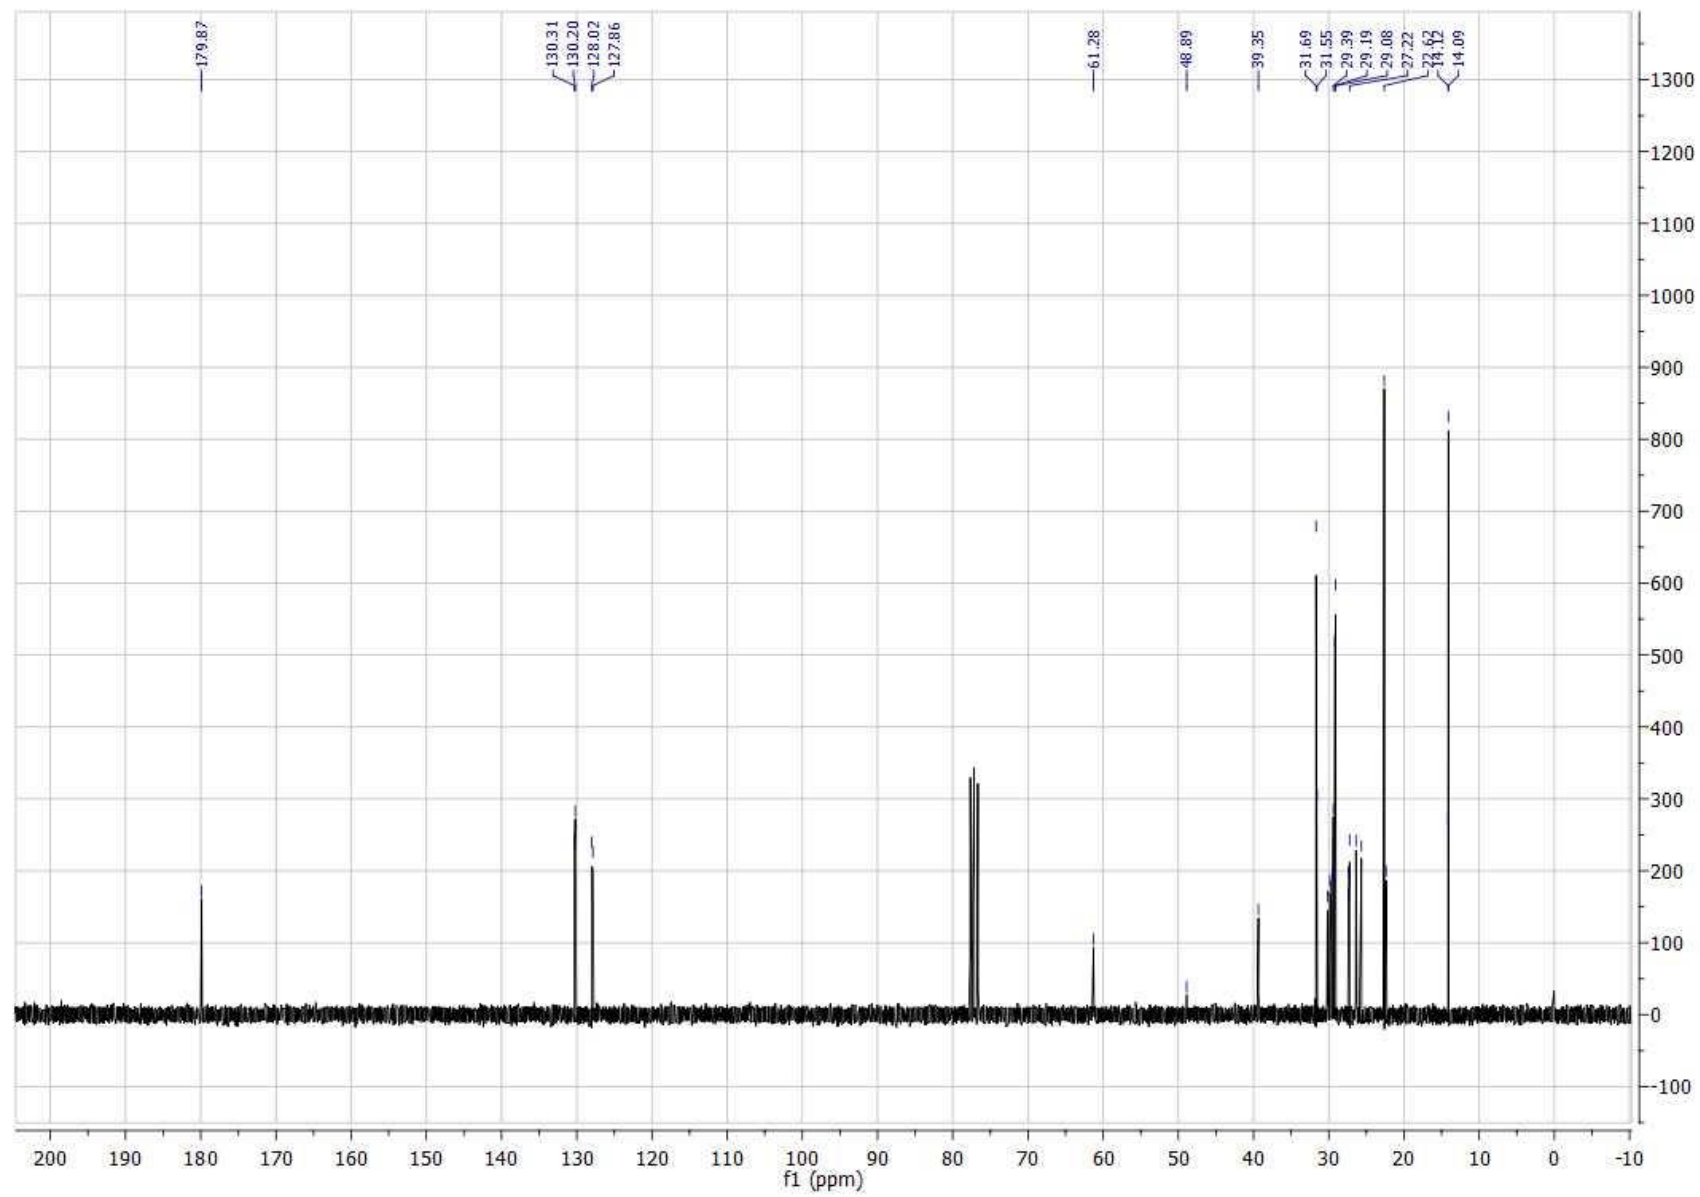

**Table S17.** Peak assignments and integrals of the <sup>1</sup>H-NMR spectrum of **9** at 25°C.

| [N <sub>8881</sub> ]               | [C18:2]                    | δ (ppm)     | Shape | Integral |
|------------------------------------|----------------------------|-------------|-------|----------|
| CHCl <sub>3</sub>                  |                            |             | s     | -        |
| -                                  | C(9,10,12,13)              | 5,44-5,23   | m     | 3,76     |
| H <sub>2</sub> O                   |                            |             |       |          |
| C(1,1',1'')H <sub>2</sub>          | -                          | 3,36-3,21   | m     | 8,83     |
| C(1''')H <sub>3</sub>              | -                          | 3,17        |       |          |
| -                                  | C(11)H <sub>2</sub>        | 2,76        | t     | 1,83     |
| -                                  | C(2)H <sub>2</sub>         | 2,03        | t     | 2,00     |
| -                                  | C(8,11)H <sub>2</sub>      | 2,08 - 1,95 | m     | 3,68     |
| C(3,3',3'')H <sub>2</sub>          | C(3)H <sub>2</sub>         | 1,73 - 1,50 | m     | 8,02     |
| C(4-7,4'-7',4''-7'')H <sub>2</sub> | C(4-7,14-17)H <sub>2</sub> | 1,44 - 1,14 | m     | 44,65    |
| C(8,8',8'')H <sub>3</sub>          | C(18)H <sub>3</sub>        | 0,96-0,78   | m     | 12,02    |

**Table S18.** Peak assignments of the <sup>13</sup>C-NMR spectrum of **9** at 25°C.

| [N <sub>8881</sub> ]                  | [C18:2]               | δ (ppm)            | [N <sub>8881</sub> ]      | [C18:2]             | δ (ppm) |
|---------------------------------------|-----------------------|--------------------|---------------------------|---------------------|---------|
| -                                     | C(1)OO-               | 179,8              | C(5,5',5'')H <sub>2</sub> |                     | 29,0    |
| -                                     | C(9)H <sub>2</sub>    | 130,2              | -                         | C(8)H <sub>2</sub>  | 27,3    |
| -                                     | C(13)H <sub>2</sub>   | 130,1              | -                         | C(3)H <sub>2</sub>  | 27,2    |
| -                                     | C(10)H <sub>2</sub>   | 127,9              | -                         | C(11)H <sub>2</sub> | 27,1    |
| -                                     | C(12)H <sub>2</sub>   | 127,8              | C(3,3',3'')H <sub>2</sub> | -                   | 26,2    |
| CDCl <sub>3</sub> , CHCl <sub>3</sub> |                       | 77,5-76.6,<br>77,3 | -                         | C(14)H <sub>2</sub> | 25,6    |
| C(1,1',1'')H <sub>2</sub>             | -                     | 61,3               | C(7,7',7'')H <sub>2</sub> | -                   | 22,5    |
| C(1''')H <sub>3</sub>                 | -                     | 48,9               | -                         | C(17)H <sub>2</sub> | 22,3    |
| -                                     | C(2)H <sub>2</sub>    | 39,4               | -                         | C(18)H <sub>3</sub> | 14,0    |
| -                                     | C(16)H <sub>2</sub>   | 31,6               | C(8,8',8'')H <sub>2</sub> | -                   | 14,0    |
| C(6,6',6'')H <sub>2</sub>             |                       | 31,5               |                           |                     |         |
| -                                     | C(4-16)H <sub>2</sub> | 30,1-29,3          |                           |                     |         |
| C(4,4',4'')H <sub>2</sub>             | -                     | 29,1               |                           |                     |         |

Fig S19:  $^1\text{H}$  NMR of **10** at 25 °C

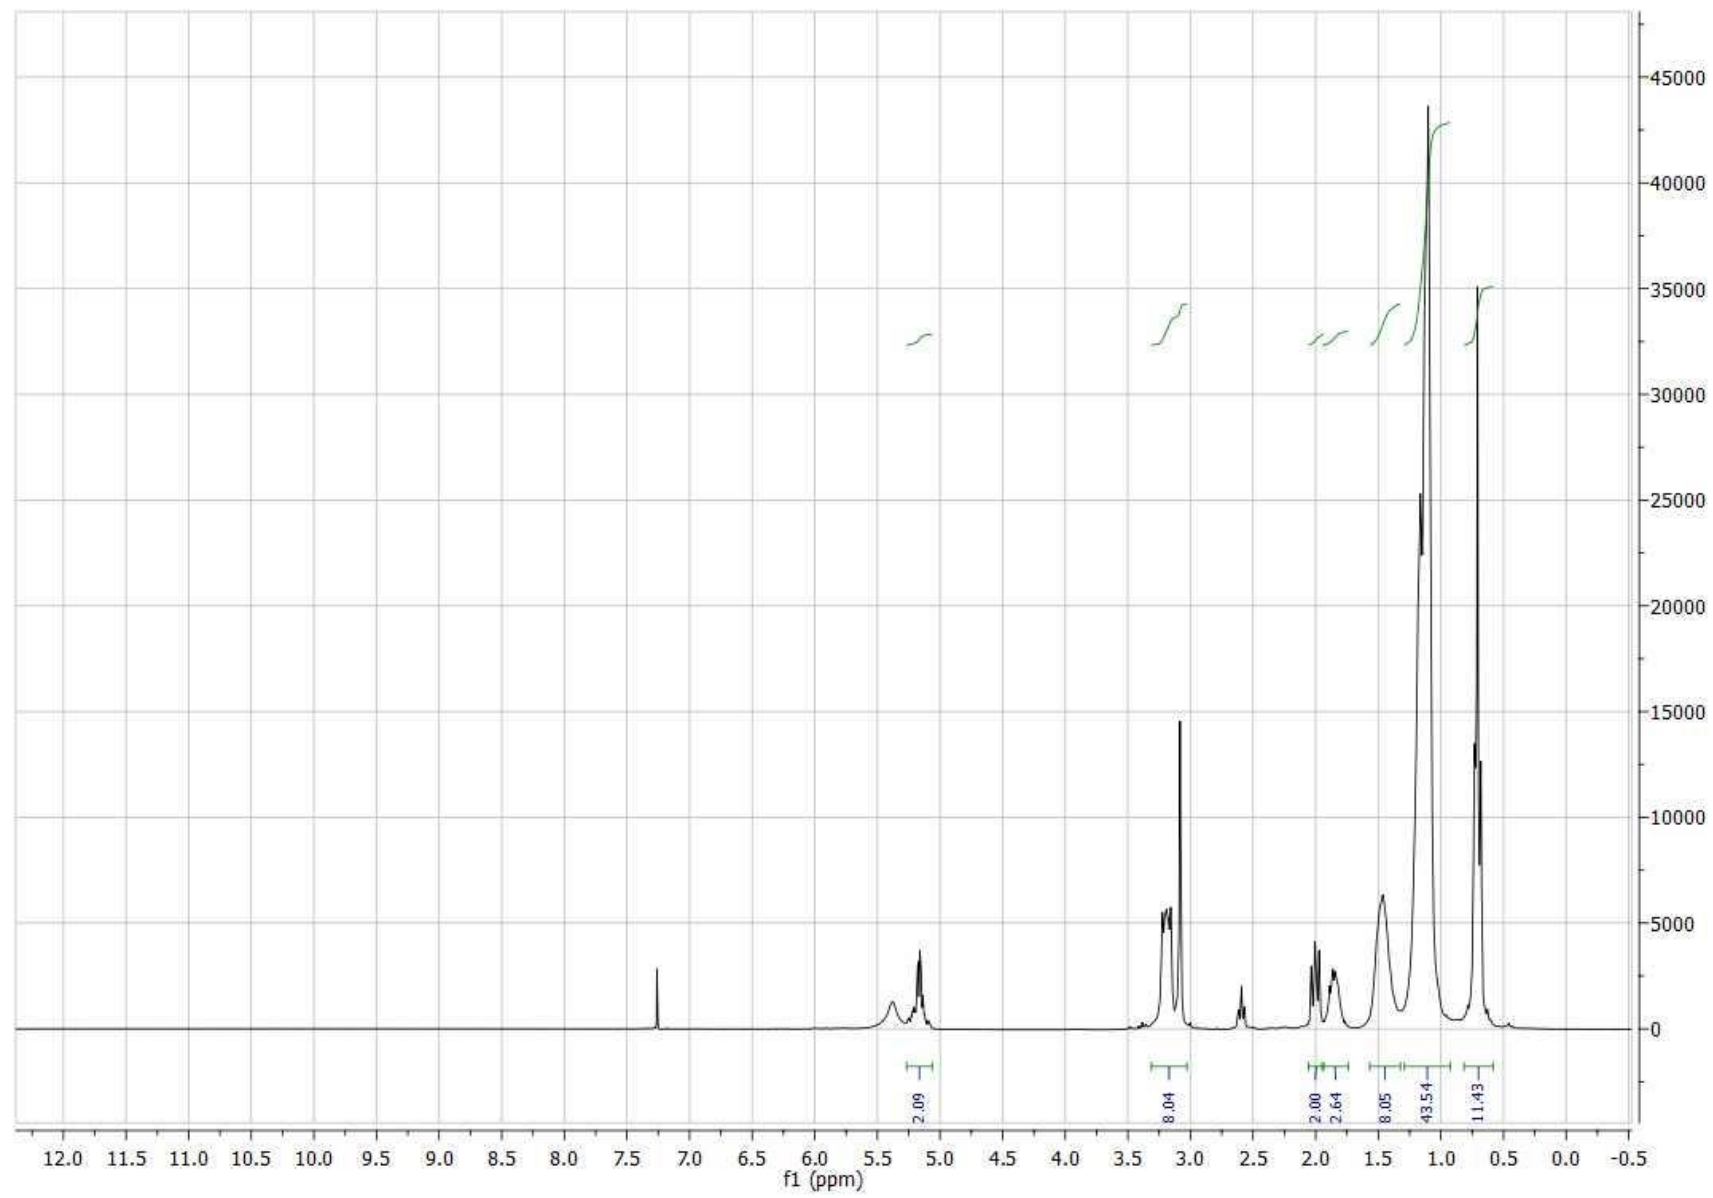

Fig S20:  $^{13}\text{C}$  NMR of **10** at 25 °C

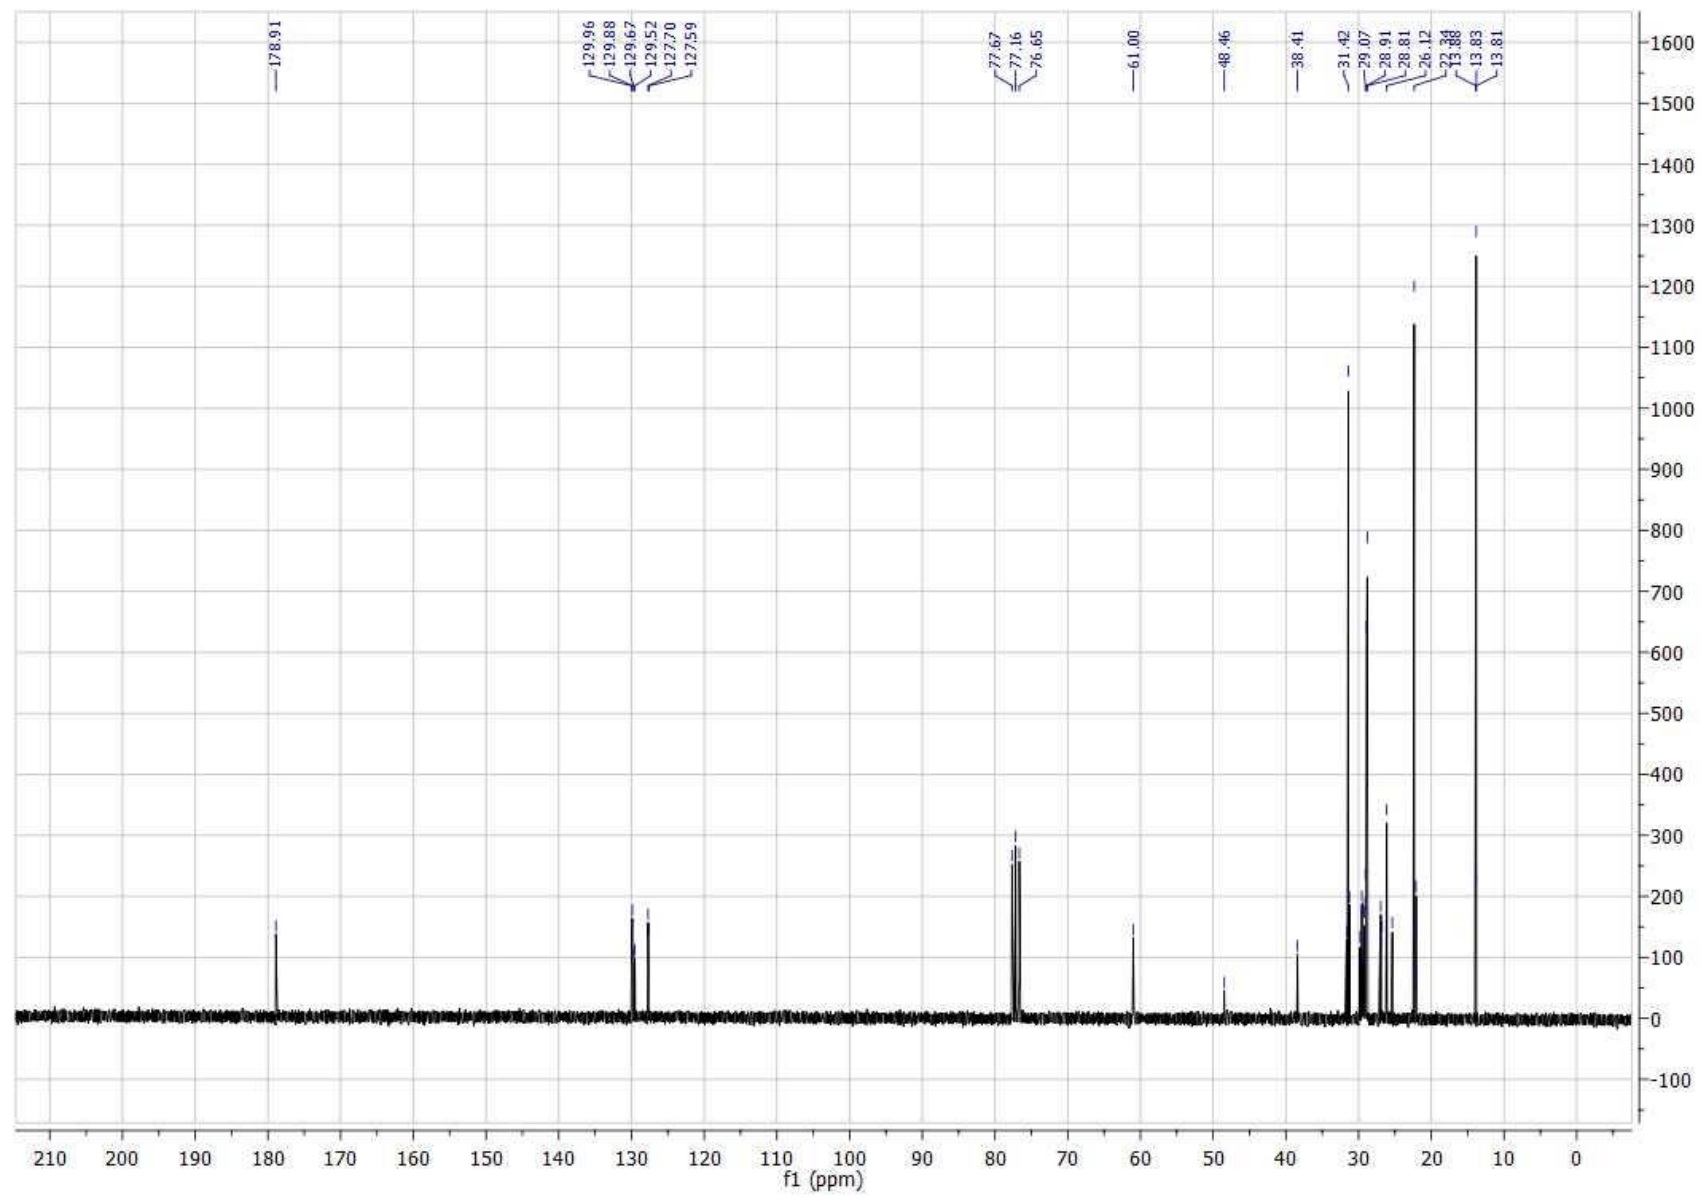

**Table S19.** Peak assignments and integrals of the <sup>1</sup>H-NMR spectrum of **10** at 25°C.

| [N <sub>8881</sub> ]                  | [C18:1-18:2 30%-70%]       | δ (ppm)     | Shape | Integral |
|---------------------------------------|----------------------------|-------------|-------|----------|
| CHCl <sub>3</sub>                     |                            |             | s     | -        |
| -                                     | C(9,10,12,13)              | 5,26-5,06   | m     | 2,09     |
| H <sub>2</sub> O                      |                            |             |       |          |
| C(1,1',1'')H <sub>2</sub>             | -                          | 3,30-3,12   | m     | 8,04     |
| C(1''')H <sub>3</sub>                 | -                          | 3,08        |       |          |
| -                                     | C(11)H <sub>2</sub>        | 2,59        | t     | 0,68     |
| -                                     | C(2)H <sub>2</sub>         | 2,00        | t     | 2,00     |
| -                                     | C(8,11)H <sub>2</sub>      | 1,94 - 1,73 | m     | 2,64     |
| C(3,3',3'')H <sub>2</sub>             | C(3)H <sub>2</sub>         | 1,57 - 1,34 | m     | 8,05     |
| C(4-7,4',7'',4'''-7''')H <sub>2</sub> | C(4-7,14-17)H <sub>2</sub> | 1,30 - 0,91 | m     | 43,54    |
| C(8,8',8'')H <sub>3</sub>             | C(18)H <sub>3</sub>        | 0,81-0,58   | m     | 11,43    |

**Table S20.** Peak assignments of the <sup>13</sup>C-NMR spectrum of **10** at 25°C.

| [N <sub>8881</sub> ]                  | [C18:1-18:2 30%-70%]  | δ (ppm)            | [N <sub>8881</sub> ]      | [C18:1-18:2 30%-70%] | δ (ppm) |
|---------------------------------------|-----------------------|--------------------|---------------------------|----------------------|---------|
| -                                     | C(1)OO-               | 178,9              | C(5,5',5'')H <sub>2</sub> |                      | 29,8    |
| -                                     | C(9)H <sub>2</sub>    | 130,0              | -                         | C(8)H <sub>2</sub>   | 27,1    |
| -                                     | C(13)H <sub>2</sub>   | 129,9              | -                         | C(3)H <sub>2</sub>   | 27,0    |
| -                                     | C(10)H <sub>2</sub>   | 127,7              | -                         | C(11)H <sub>2</sub>  | 26,9    |
| -                                     | C(12)H <sub>2</sub>   | 127,6              | C(3,3',3'')H <sub>2</sub> | -                    | 26,1    |
| CDCl <sub>3</sub> , CHCl <sub>3</sub> |                       | 77,5-76.6,<br>77,3 | -                         | C(14)H <sub>2</sub>  | 25,4    |
| C(1,1',1'')H <sub>2</sub>             | -                     | 61,0               | C(7,7',7'')H <sub>2</sub> | -                    | 22,4    |
| C(1''')H <sub>3</sub>                 | -                     | 48,5               | -                         | C(17)H <sub>2</sub>  | 22,1    |
| -                                     | C(2)H <sub>2</sub>    | 38,4               | -                         | C(18)H <sub>3</sub>  | 13,9    |
| -                                     | C(16)H <sub>2</sub>   | 31,6               | C(8,8',8'')H <sub>2</sub> | -                    | 13,8    |
| C(6,6',6'')H <sub>2</sub>             |                       | 31,3               |                           |                      |         |
| -                                     | C(4-16)H <sub>2</sub> | 29,8-29,1          |                           |                      |         |
| C(4,4',4'')H <sub>2</sub>             | -                     | 29,9               |                           |                      |         |

Fig S21:  $^1\text{H}$  NMR of **11** at 25 °C

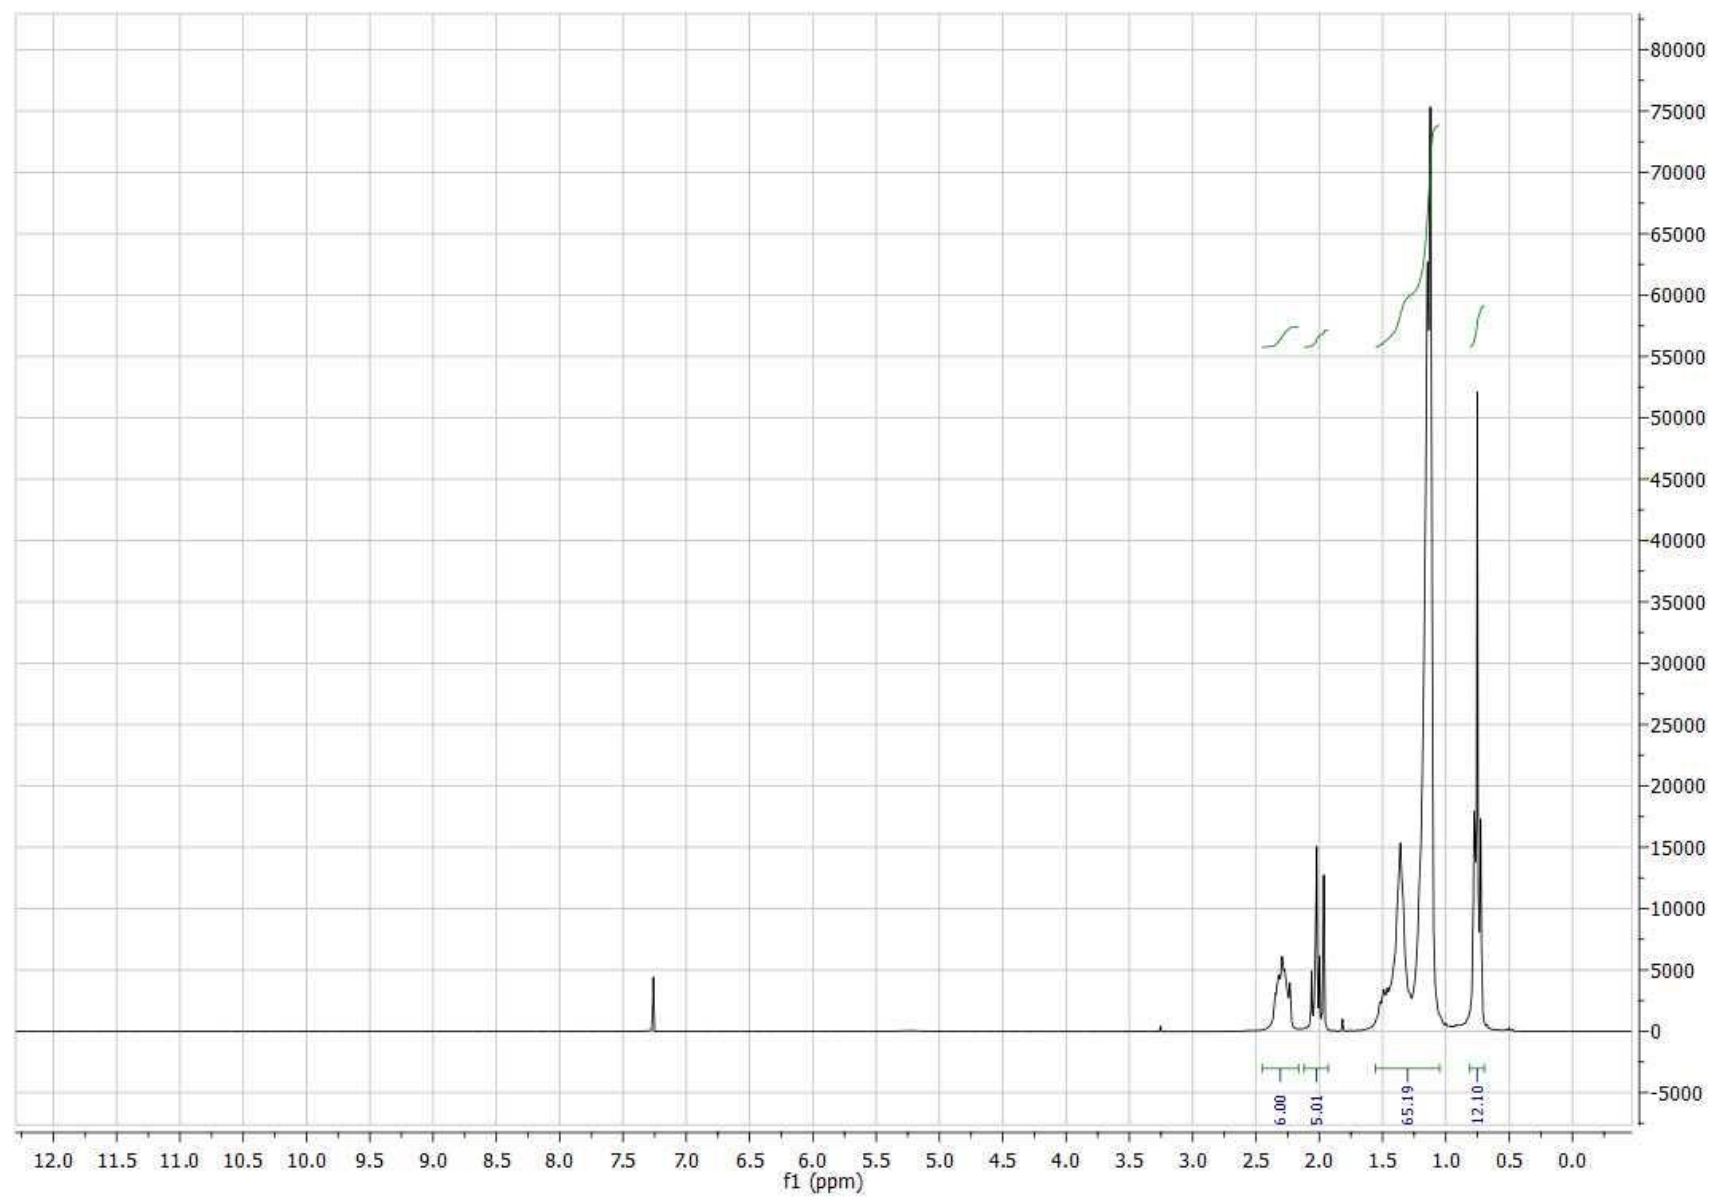



Fig S22:  $^{13}\text{C}$  NMR of **11** at 25 °C

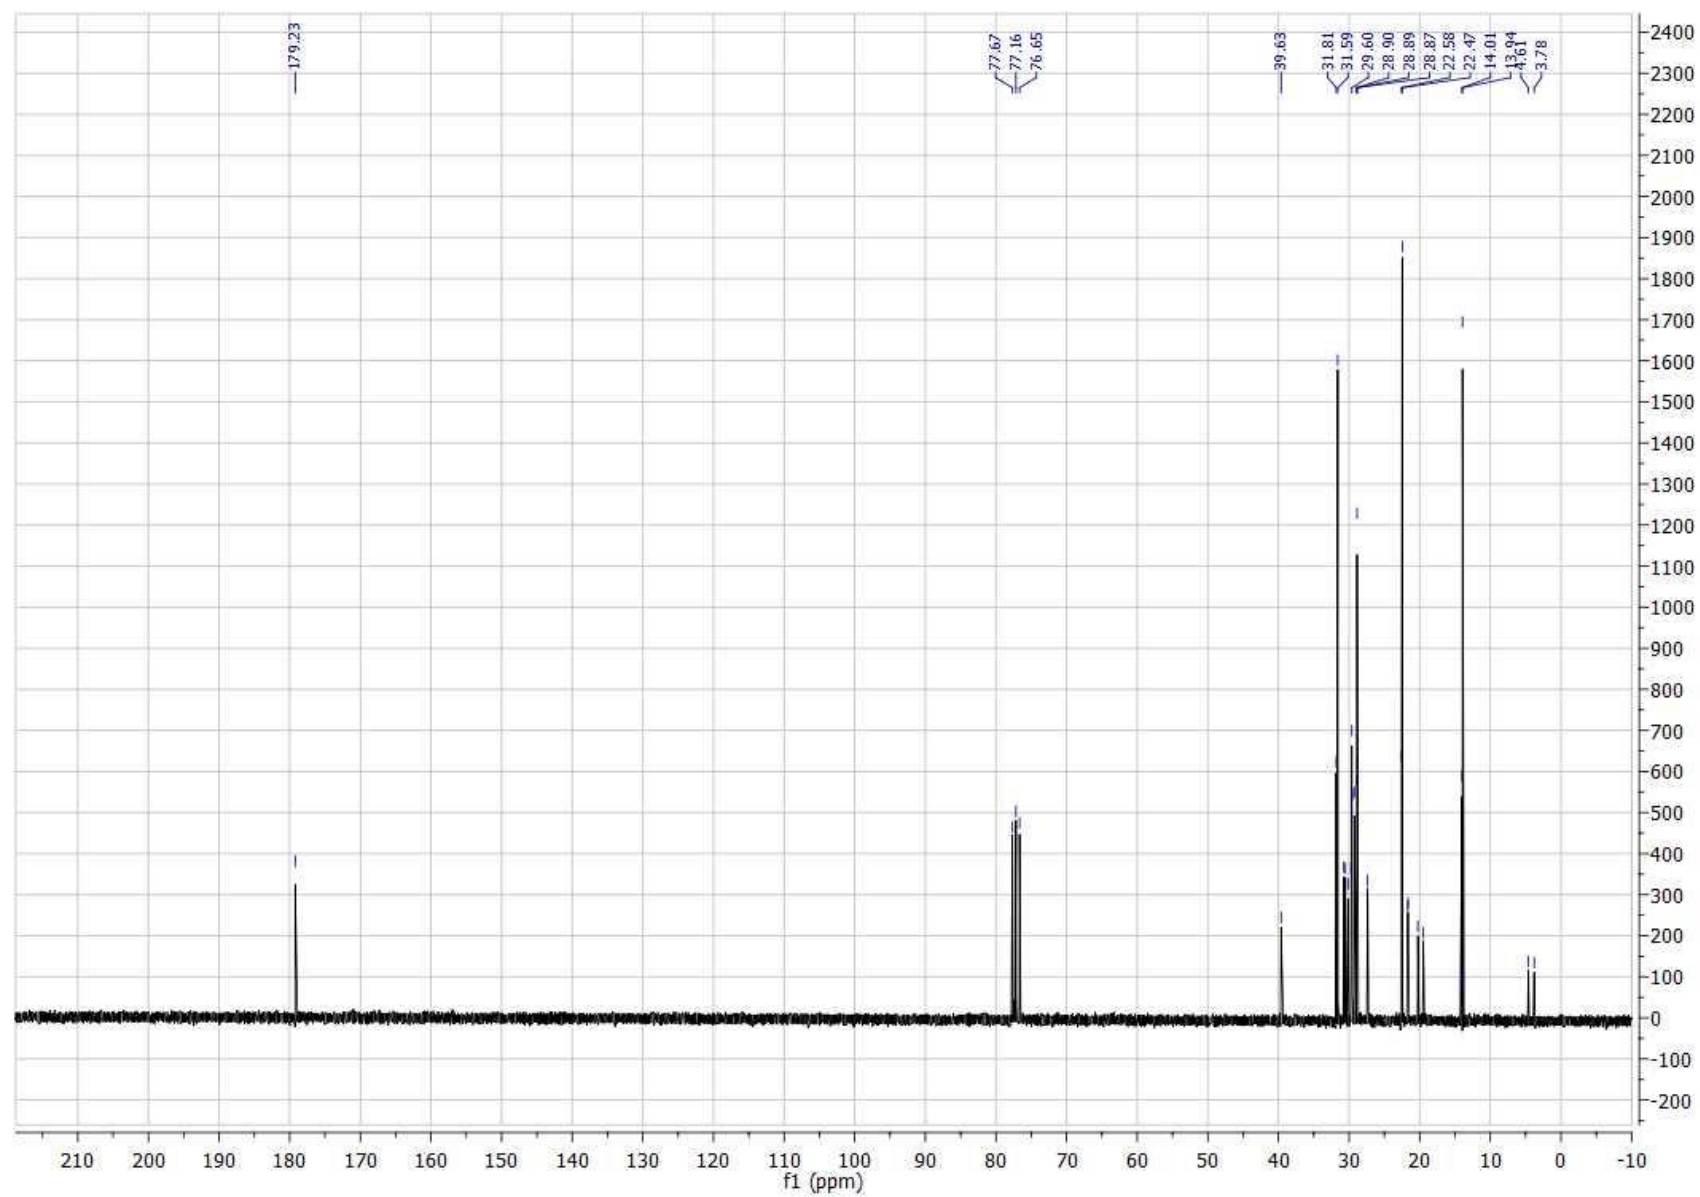

**Table S21.** Peak assignments and integrals of the <sup>1</sup>H-NMR spectrum of **11** at 25°C.

| [P8881]                            | [C16]                 | δ (ppm)     | Shape | Integral |
|------------------------------------|-----------------------|-------------|-------|----------|
| CHCl <sub>3</sub>                  |                       | 7,26        | s     | -        |
| C(1,1',1'')H <sub>2</sub>          | -                     | 2,42-2,17   | m     | 6,00     |
| C(1''')H <sub>3</sub>              | C(2)H <sub>2</sub>    | 2,10-1,92   | m     | 5,01     |
| C(3-7,3'-7',3''-7'')H <sub>2</sub> | C(3-15)H <sub>2</sub> | 1,55-1,04   | m     | 65,19    |
| C(8,8',8'')H <sub>3</sub>          | C(16)H <sub>3</sub>   | 0,81 - 0,68 | m     | 12,10    |

**Table S22.** Peak assignments of the <sup>13</sup>C-NMR spectrum of **11** at 25°C.

| [P8881]                               | [C16]                 | δ (ppm)            | [P8881]                   | [C16]               | δ (ppm)   |
|---------------------------------------|-----------------------|--------------------|---------------------------|---------------------|-----------|
| -                                     | C(1)OO-               | 179,2              | C(3,3',3'')H <sub>2</sub> | -                   | 26,4      |
| CDCl <sub>3</sub> , CHCl <sub>3</sub> |                       | 77,5-76,6,<br>77,3 | -                         | C(15)H <sub>2</sub> | 22,6      |
| -                                     | C(2)H <sub>2</sub>    | 39,7               | C(7,7',7'')H <sub>2</sub> | -                   | 22,5      |
| -                                     | C(14)H <sub>2</sub>   | 31,8               | C(3,3',3'')H <sub>2</sub> | -                   | 21,7;21,6 |
| C(6,6',6'')H <sub>2</sub>             |                       | 31,6               | C(2,2',2'')H <sub>2</sub> | -                   | 20,3;19,5 |
| -                                     | C(4-13)H <sub>2</sub> | 30,8-28,9          | -                         | C(16)H <sub>3</sub> | 14,0      |
| C(4,4',4'')H <sub>2</sub>             | -                     | 29,6               | C(8,8',8'')H <sub>2</sub> | -                   | 13,9      |
| C(5,5',5'')H <sub>2</sub>             | -                     | 28,9               | C(1''')H <sub>3</sub>     | -                   | 4,6 ; 3,8 |
| -                                     | C(3)H <sub>2</sub>    | 27,4               |                           |                     |           |

Fig S23:  $^1\text{H}$  NMR of **12** at 25 °C

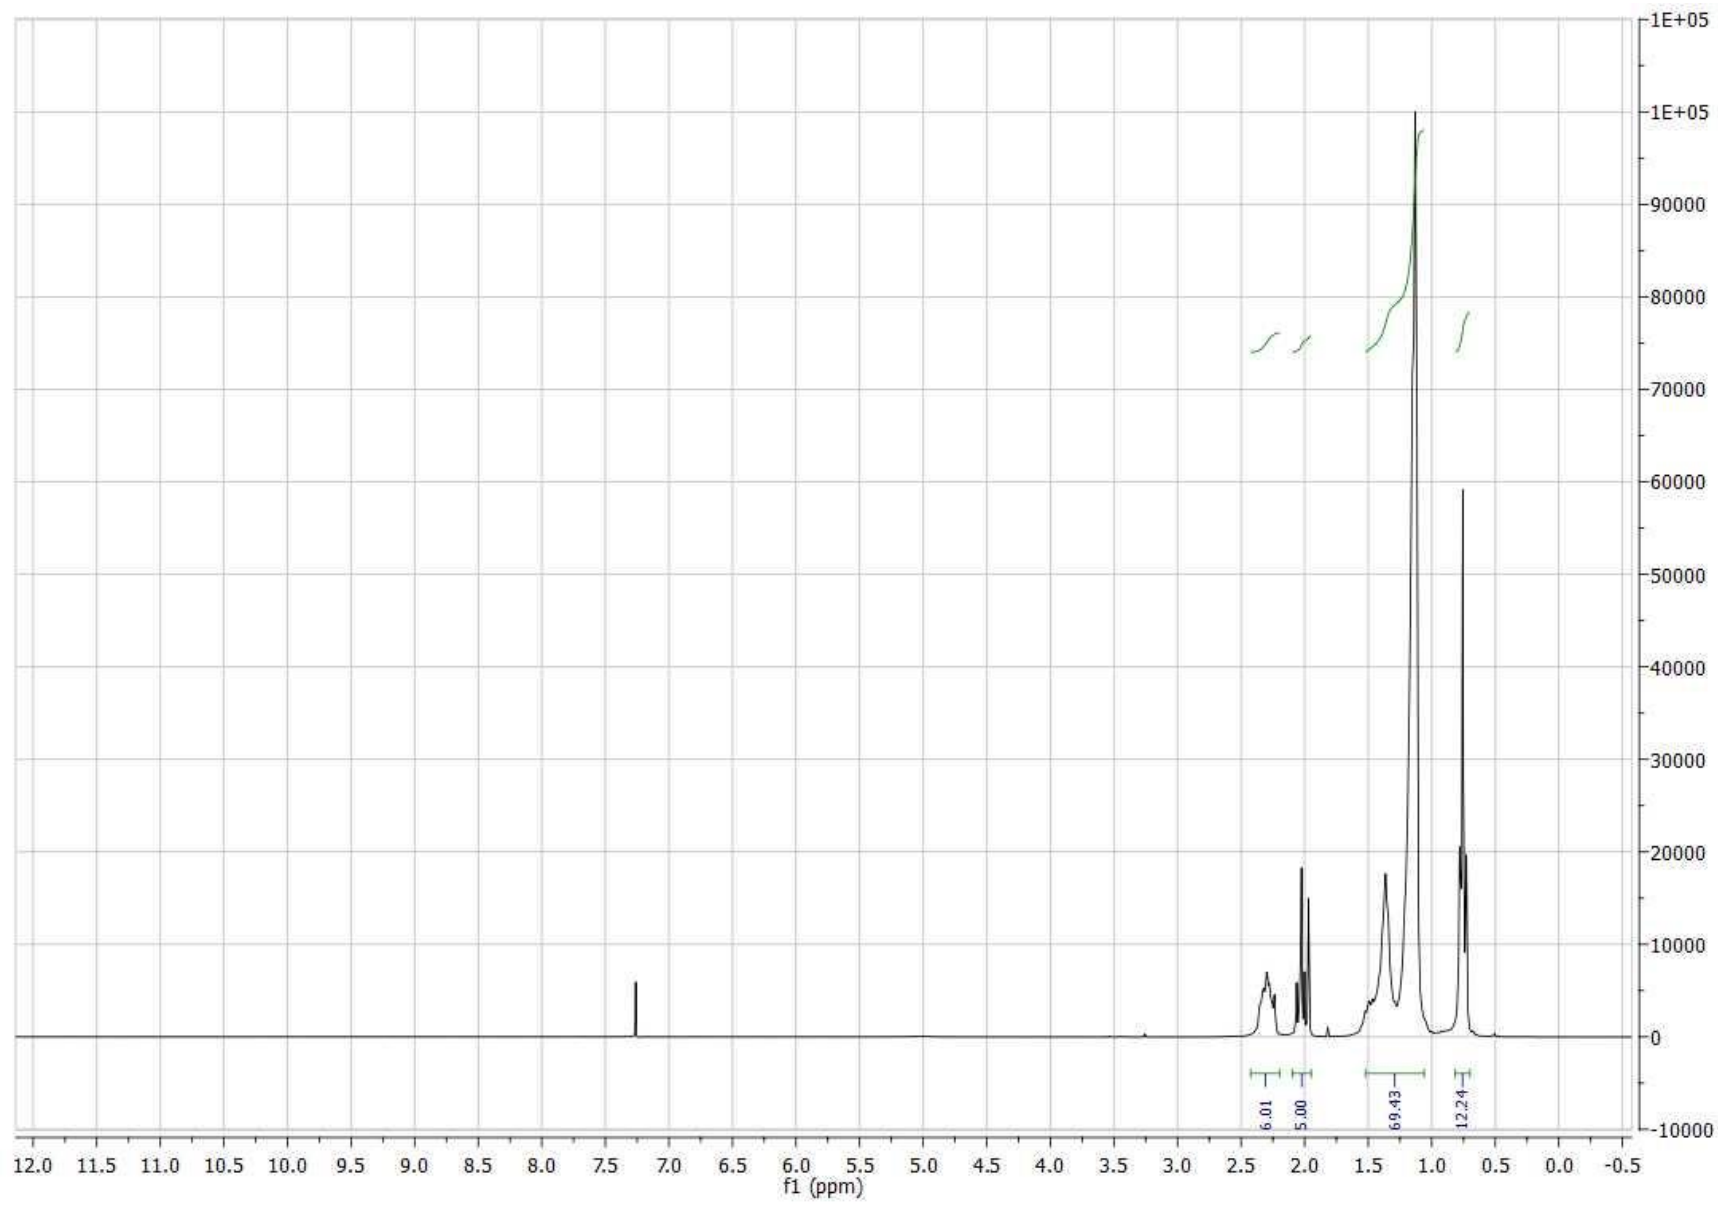

Fig S24:  $^{13}\text{C}$  NMR of **12** at 25 °C

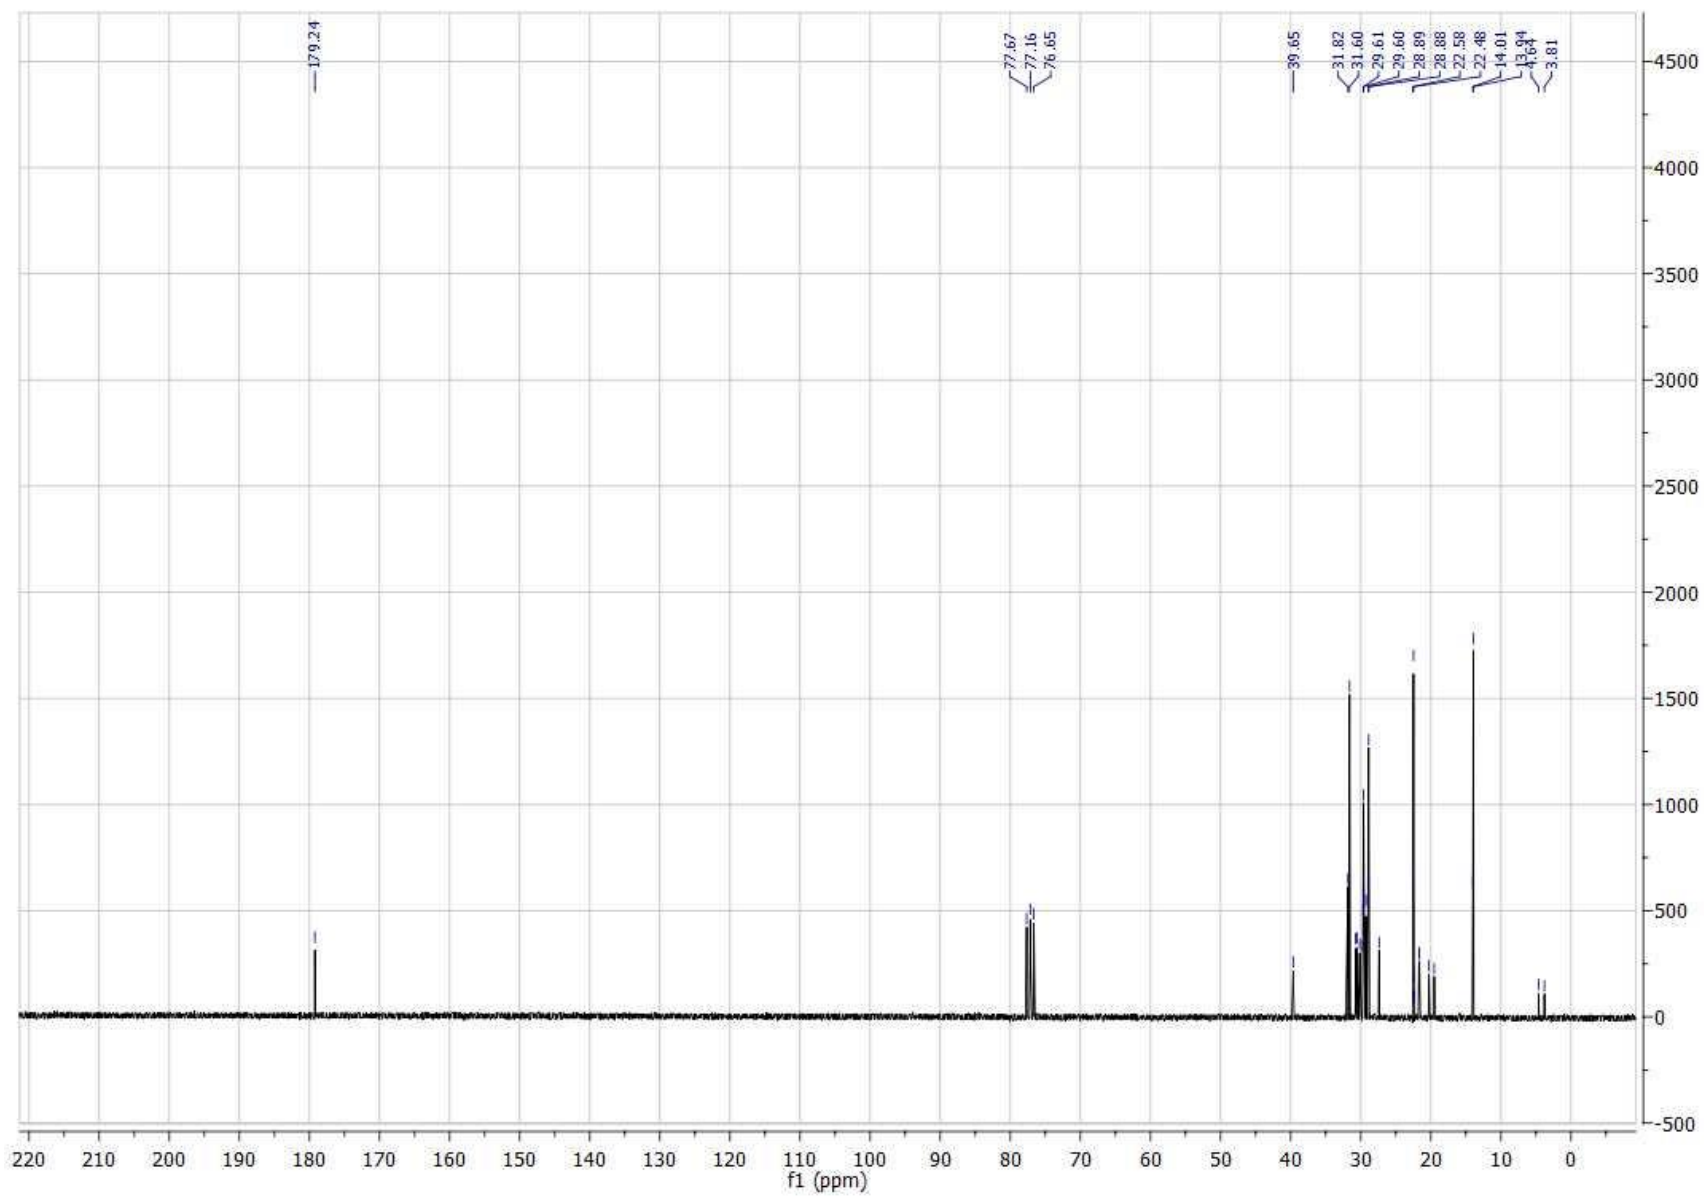

**Table S23.** Peak assignments and integrals of the <sup>1</sup>H-NMR spectrum of **12** at 25°C.

| [P <sub>8881</sub> ]               | [C <sub>18</sub> ]    | δ (ppm)     | Shape | Integral |
|------------------------------------|-----------------------|-------------|-------|----------|
| CHCl <sub>3</sub>                  |                       | 7,26        | s     | -        |
| C(1,1',1'')H <sub>2</sub>          | -                     | 2,42-2,19   | m     | 6,01     |
| C(1''')H <sub>3</sub>              | C(2)H <sub>2</sub>    | 2,09-1,94   | m     | 5,00     |
| C(3-7,3'-7',3''-7'')H <sub>2</sub> | C(3-17)H <sub>2</sub> | 1,59-1,00   | m     | 69,43    |
| C(8,8',8'')H <sub>3</sub>          | C(18)H <sub>3</sub>   | 0,82 - 0,69 | m     | 12,24    |

**Table S24.** Peak assignments of the <sup>13</sup>C-NMR spectrum of **12** at 25°C.

| [P <sub>8881</sub> ]                  | [C <sub>18</sub> ]    | δ (ppm)            | [P <sub>8881</sub> ]      | [C <sub>18</sub> ]  | δ (ppm)   |
|---------------------------------------|-----------------------|--------------------|---------------------------|---------------------|-----------|
| -                                     | C(1)OO-               | 179,2              | C(3,3',3'')H <sub>2</sub> | -                   | 26,4      |
| CDCl <sub>3</sub> , CHCl <sub>3</sub> |                       | 77,5-76,6,<br>77,3 | -                         | C(17)H <sub>2</sub> | 22,6      |
| -                                     | C(2)H <sub>2</sub>    | 39,7               | C(7,7',7'')H <sub>2</sub> | -                   | 22,5      |
| -                                     | C(16)H <sub>2</sub>   | 31,8               | C(3,3',3'')H <sub>2</sub> | -                   | 21,7;21,6 |
| C(6,6',6'')H <sub>2</sub>             |                       | 31,6               | C(2,2',2'')H <sub>2</sub> | -                   | 20,3;19,5 |
| -                                     | C(4-15)H <sub>2</sub> | 29,7-28,9          | -                         | C(18)H <sub>3</sub> | 14,0      |
| C(4,4',4'')H <sub>2</sub>             | -                     | 29,6               | C(8,8',8'')H <sub>2</sub> | -                   | 13,9      |
| C(5,5',5'')H <sub>2</sub>             | -                     | 28,9               | C(1''')H <sub>3</sub>     | -                   | 4,6 ; 3,8 |
| -                                     | C(3)H <sub>2</sub>    | 27,4               |                           |                     |           |

Fig S25:  $^1\text{H}$  NMR of **13** at 25 °C

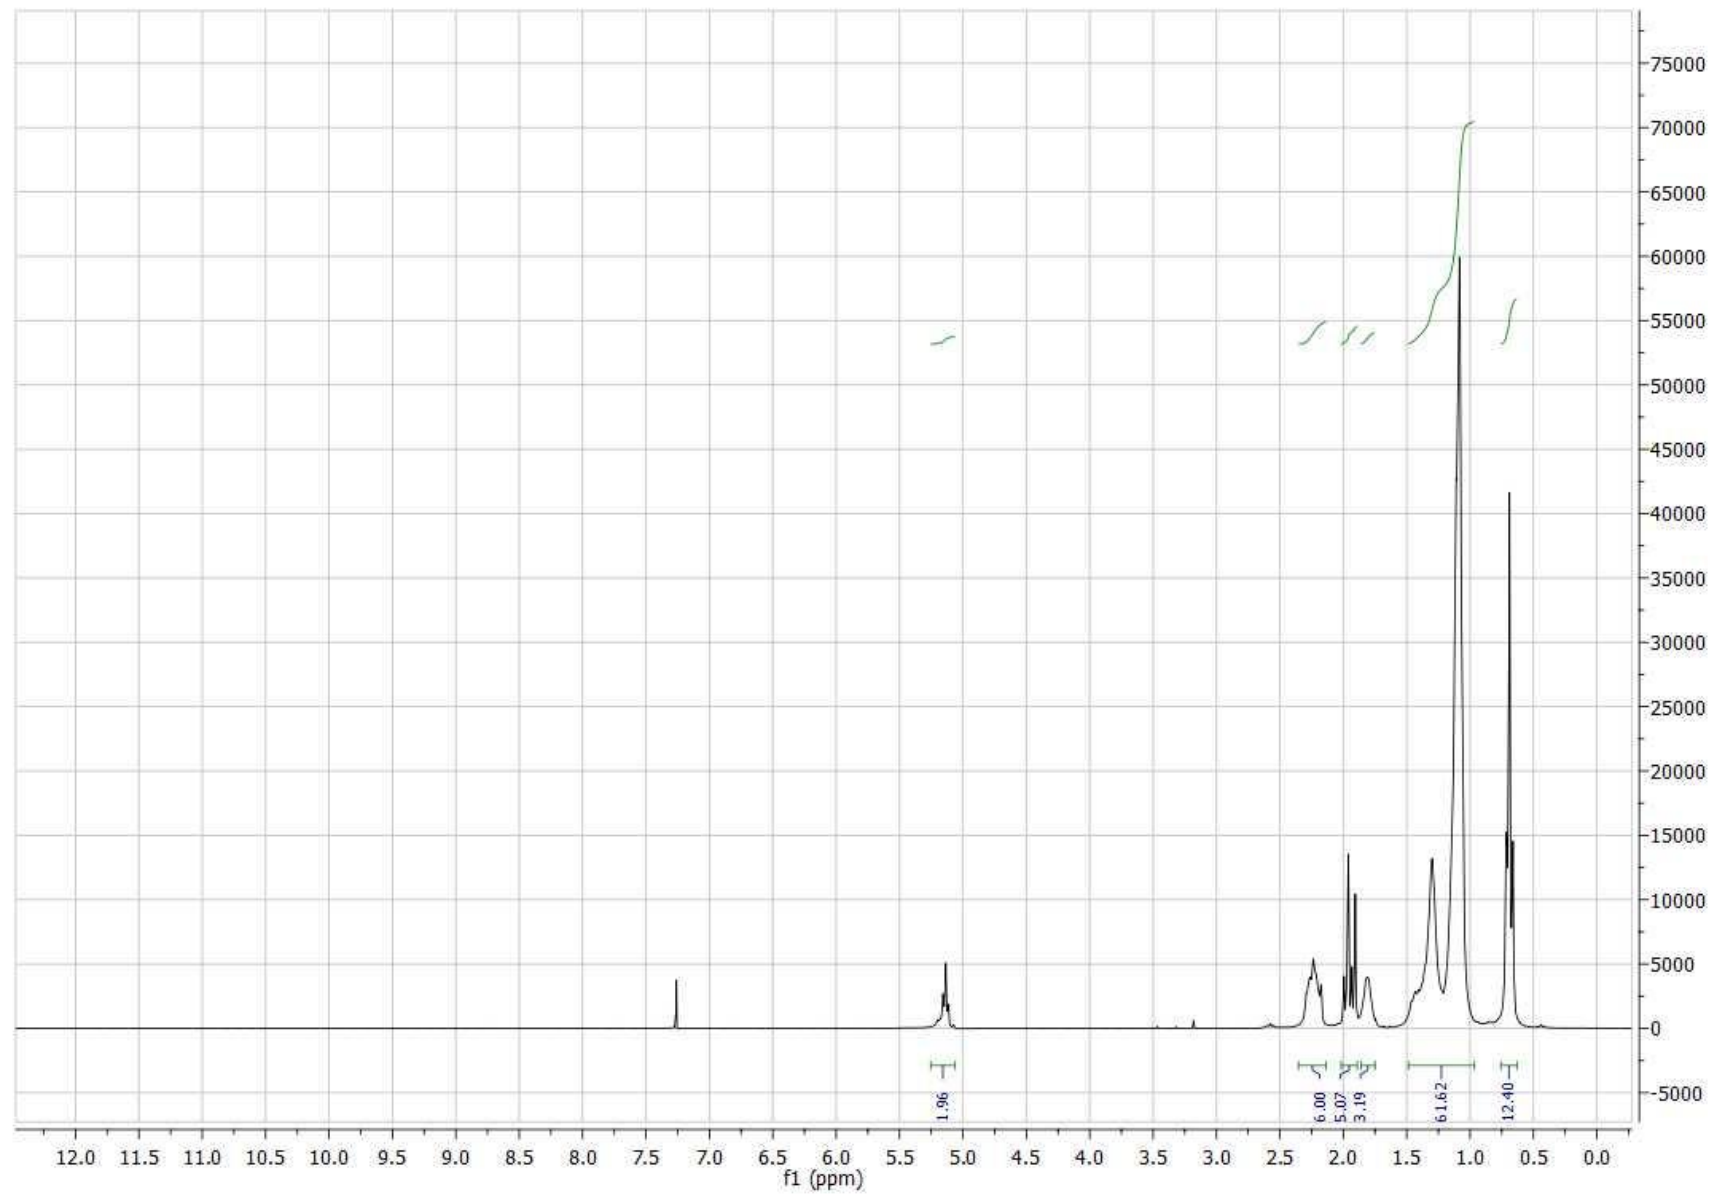

Fig S26:  $^{13}\text{C}$  NMR of **13** at 25 °C

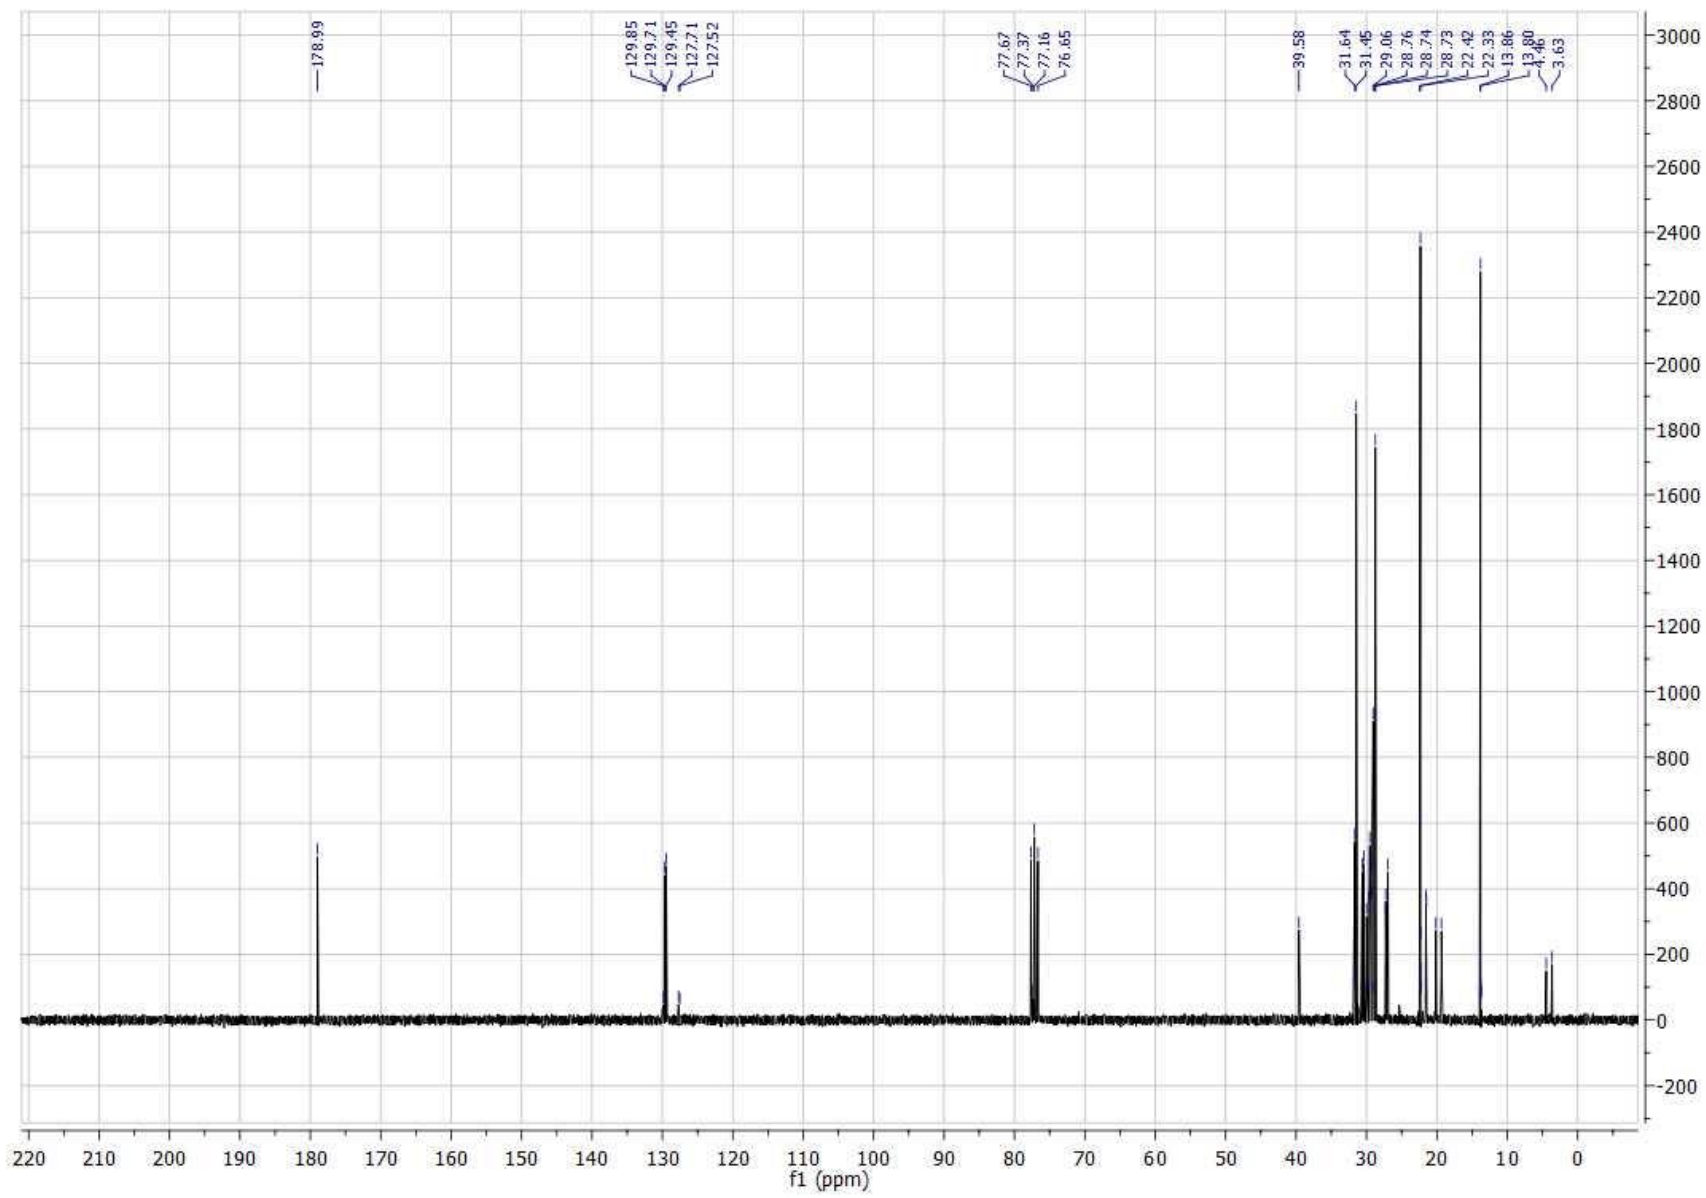

**Table S25.** Peak assignments and integrals of the <sup>1</sup>H-NMR spectrum of **13** at 25°C.

| [P8881]                            | [C18:1 tested according to Ph.Eur.] | δ (ppm)     | Shape | Integral |
|------------------------------------|-------------------------------------|-------------|-------|----------|
| CHCl <sub>3</sub>                  |                                     | 7,26        | s     | -        |
| -                                  | C(9,10)H <sub>2</sub>               | 5,25-5,06   | m     | 1,96     |
| C(1,1',1'')H <sub>2</sub>          | -                                   | 2,42-2,19   | m     | 6,00     |
| C(1''')H <sub>3</sub>              | C(2)H <sub>2</sub>                  | 2,09-1,94   | m     | 5,07     |
| -                                  | C(8,11)H <sub>2</sub>               | 1,86-1,74   | m     | 3,19     |
| C(3-7,3'-7',3''-7'')H <sub>2</sub> | C(3-15)H <sub>2</sub>               | 1,49-0,96   | m     | 61,62    |
| C(8,8',8'')H <sub>3</sub>          | C(18)H <sub>3</sub>                 | 0,76 - 0,63 | m     | 12,40    |

**Table S26.** Peak assignments of the <sup>13</sup>C-NMR spectrum of **13** at 25°C.

| [P8881]                               | [C18:1 tested according to Ph.Eur.] | δ (ppm)            | [P8881]                   | [C18:1 tested according to Ph.Eur.] | δ (ppm)   |
|---------------------------------------|-------------------------------------|--------------------|---------------------------|-------------------------------------|-----------|
| -                                     | C(1)OO-                             | 179,2              | -                         | C(3)H <sub>2</sub>                  | 27,0      |
| -                                     | C(9)H <sub>2</sub>                  | 129,7              | -                         | C(11)H <sub>2</sub>                 | 26,9      |
| -                                     | C(10)H <sub>2</sub>                 | 129,5              | C(3,3',3'')H <sub>2</sub> | -                                   | 26,4      |
| CDCl <sub>3</sub> , CHCl <sub>3</sub> |                                     | 77,5-76,6,<br>77,3 | -                         | C(17)H <sub>2</sub>                 | 22,4      |
| -                                     | C(2)H <sub>2</sub>                  | 39,6               | C(7,7',7'')H <sub>2</sub> | -                                   | 22,3      |
| -                                     | C(16)H <sub>2</sub>                 | 31,6               | C(3,3',3'')H <sub>2</sub> | -                                   | 21,6;21,5 |
| C(6,6',6'')H <sub>2</sub>             |                                     | 31,5               | C(2,2',2'')H <sub>2</sub> | -                                   | 20,1;19,4 |
| -                                     | C(4-7,12-15)H <sub>2</sub>          | 30,6-28,8          | -                         | C(18)H <sub>3</sub>                 | 13,9      |
| C(4,4',4'')H <sub>2</sub>             | -                                   | 28,7               | C(8,8',8'')H <sub>2</sub> | -                                   | 13,8      |
| C(5,5',5'')H <sub>2</sub>             | -                                   | 28,7               | C(1''')H <sub>3</sub>     | -                                   | 4,5 ; 3,6 |
| -                                     | C(8)H <sub>2</sub>                  | 27,3               |                           |                                     |           |



Fig S27:  $^1\text{H}$  NMR of **14** at 25 °C

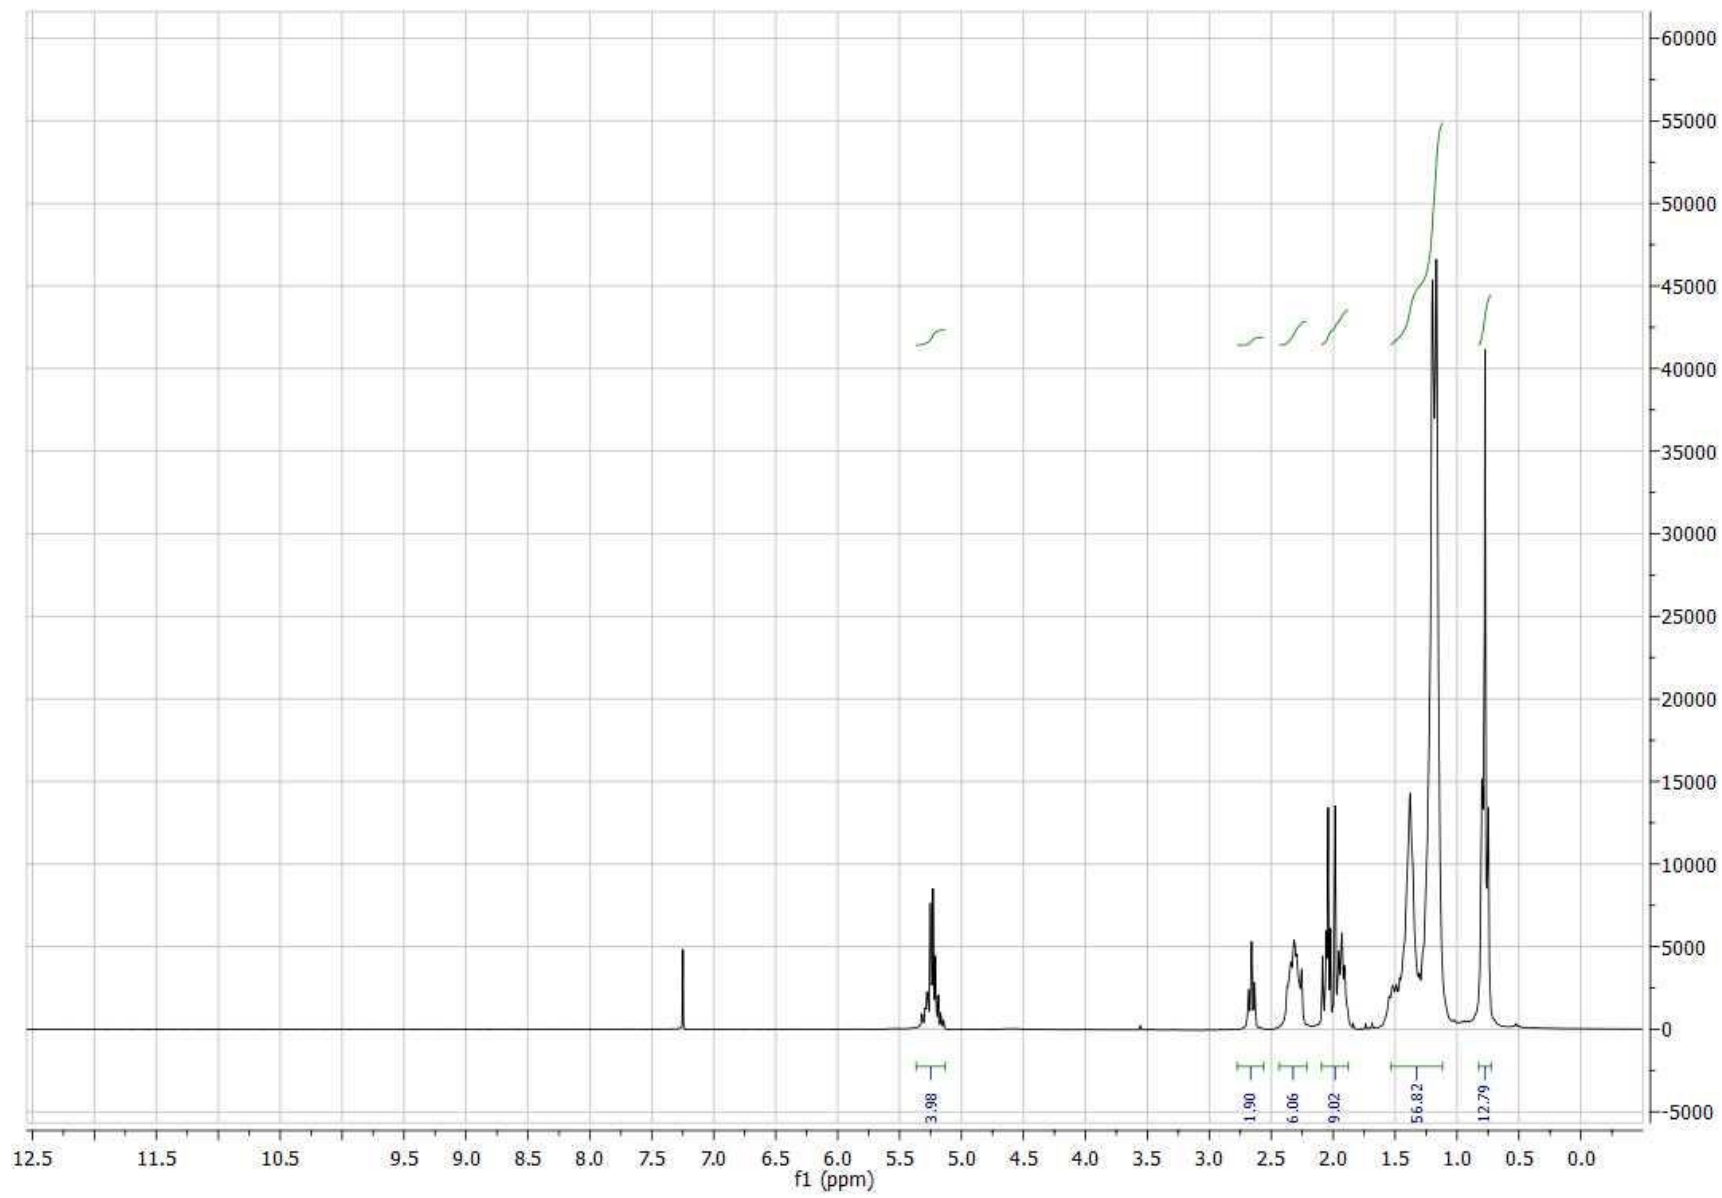

Fig S28:  $^{13}\text{C}$  NMR of **14** at 25 °C

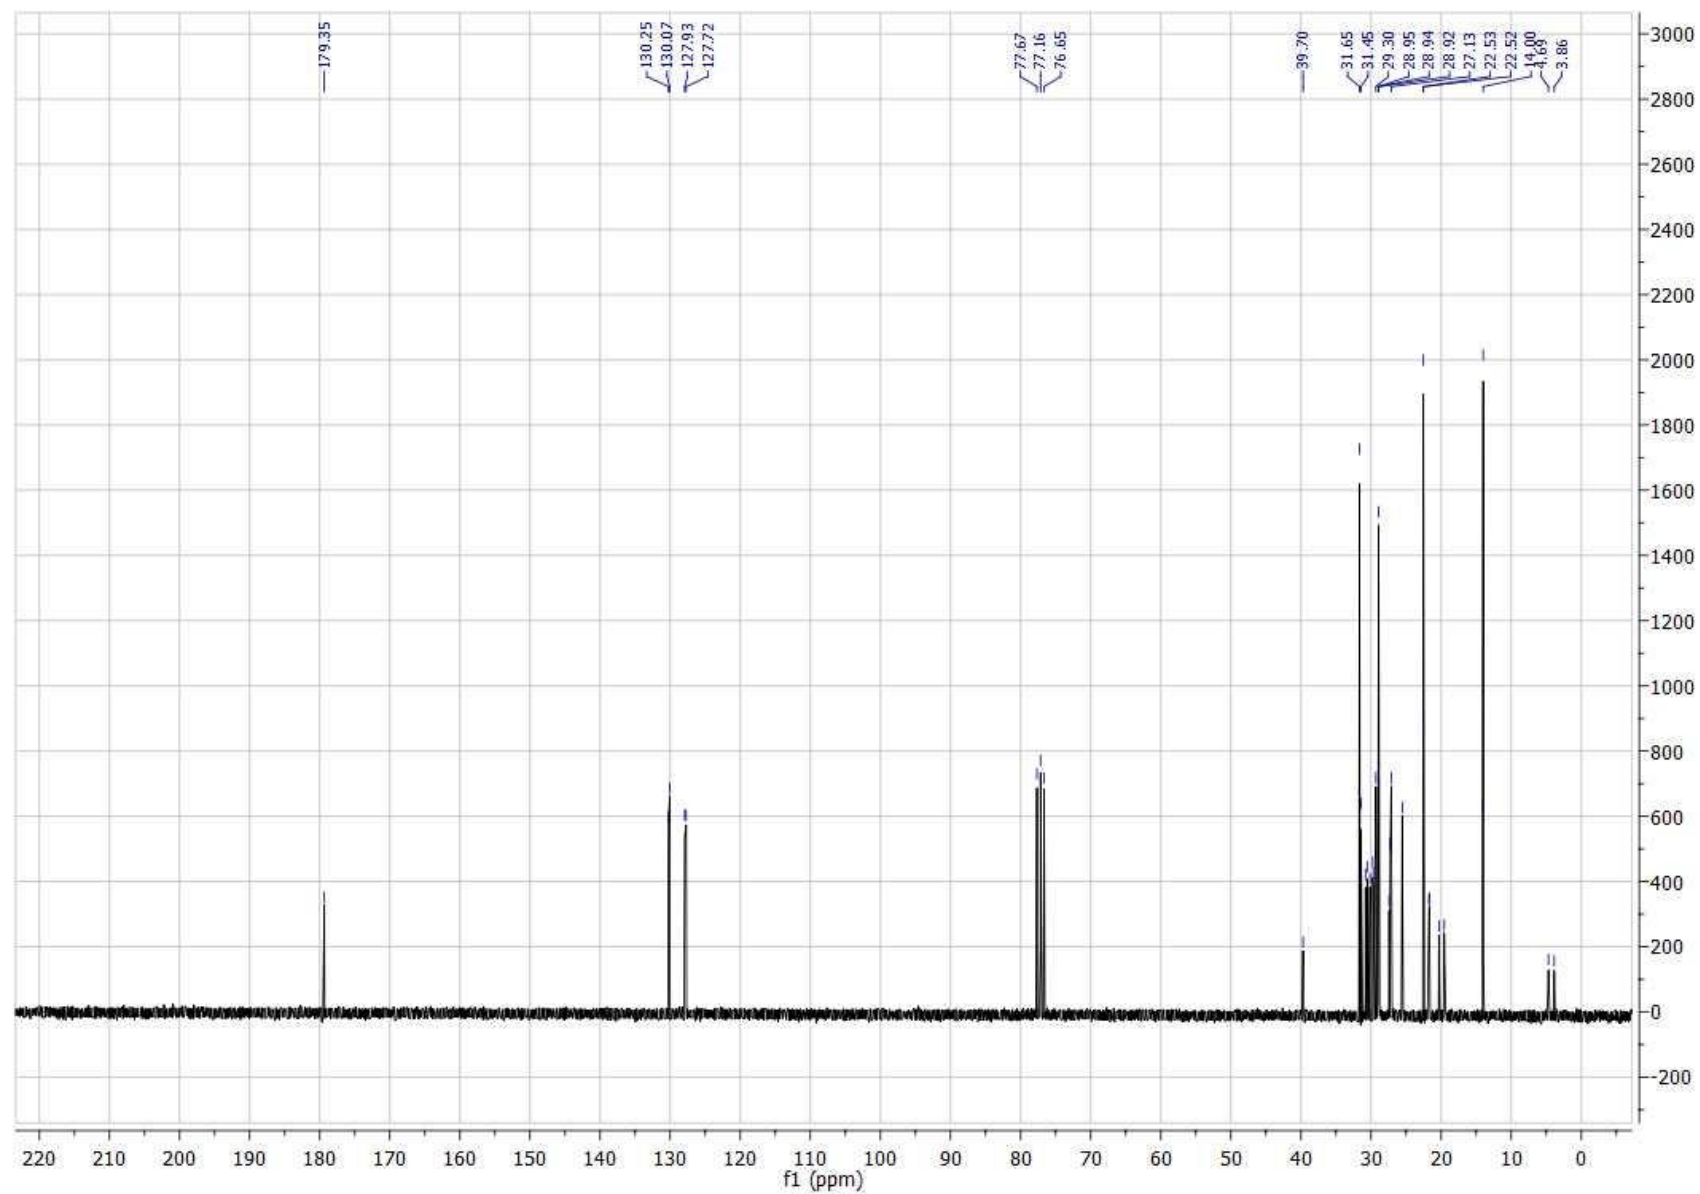

**Table S27.** Peak assignments and integrals of the <sup>1</sup>H-NMR spectrum of **14** at 25°C.

| [P <sub>8881</sub> ]               | [C <sub>18:2</sub> ]        | δ (ppm)     | Shape | Integral |
|------------------------------------|-----------------------------|-------------|-------|----------|
| CHCl <sub>3</sub>                  |                             | 7,26        | s     | -        |
| -                                  | C(9,10,12,13)H <sub>2</sub> | 5,36-5,12   | m     | 3,98     |
| -                                  | C(11)H <sub>2</sub>         | 2,64        | t     | 1,90     |
| C(1,1',1'')H <sub>2</sub>          | -                           | 2,42-2,19   | m     | 6,06     |
| C(1''')H <sub>3</sub>              | C(2)H <sub>2</sub>          | 2,10-1,84   | m     | 9,02     |
| -                                  | C(8,11)H <sub>2</sub>       |             |       |          |
| C(3-7,3',7',3''-7'')H <sub>2</sub> | C(3-15)H <sub>2</sub>       | 1,61-0,99   | m     | 56,82    |
| C(8,8',8'')H <sub>3</sub>          | C(18)H <sub>3</sub>         | 0,88 - 0,65 | m     | 12,79    |

**Table S28.** Peak assignments of the <sup>13</sup>C-NMR spectrum of **14** at 25°C.

| [P <sub>8881</sub> ]                  | [C <sub>18:2</sub> ]    | δ (ppm)            | [P <sub>8881</sub> ]      | [C <sub>18:2</sub> ]  | δ (ppm)   |
|---------------------------------------|-------------------------|--------------------|---------------------------|-----------------------|-----------|
| -                                     | C(1)OO <sup>-</sup>     | 179,4              | -                         | C(8,14)H <sub>2</sub> | 27,3      |
| -                                     | C(9)H <sub>2</sub>      | 130,3              | C(3,3',3'')H <sub>2</sub> | -                     | 27,1      |
| -                                     | C(13)H <sub>2</sub>     | 130,1              | -                         | C(11)H <sub>2</sub>   | 25,6      |
| -                                     | C(10)H <sub>2</sub>     | 128,0              | C(7,7',7'')H <sub>2</sub> | -                     | 22,5      |
| -                                     | C(12)H <sub>2</sub>     | 127,7              | -                         | C(17)H <sub>2</sub>   | 22,5      |
| CDCl <sub>3</sub> , CHCl <sub>3</sub> |                         | 77,5-76.6,<br>77,3 | C(3,3',3'')H <sub>2</sub> | -                     | 21,8;21,7 |
| -                                     | C(2)H <sub>2</sub>      | 39,7               | C(2,2',2'')H <sub>2</sub> | -                     | 20,3;19,6 |
| C(6,6',6'')H <sub>2</sub>             | -                       | 31,7               | -                         | C(18)H <sub>3</sub>   | 14,0      |
| -                                     | C(16)H <sub>2</sub>     | 31,5               | C(8,8',8'')H <sub>2</sub> | -                     | 14,0      |
| -                                     | C(4-8,15)H <sub>2</sub> | 30,8-29,0          | C(1''')H <sub>3</sub>     | -                     | 4,7 ; 3,9 |
| C(4,4',4'')H <sub>2</sub>             | -                       | 29,3               |                           |                       |           |
| C(5,5',5'')H <sub>2</sub>             | -                       | 28,9               |                           |                       |           |
| -                                     | C(3)H <sub>2</sub>      | 27,4               |                           |                       |           |

Fig S29:  $^1\text{H}$  NMR of **15** at 25  $^\circ\text{C}$

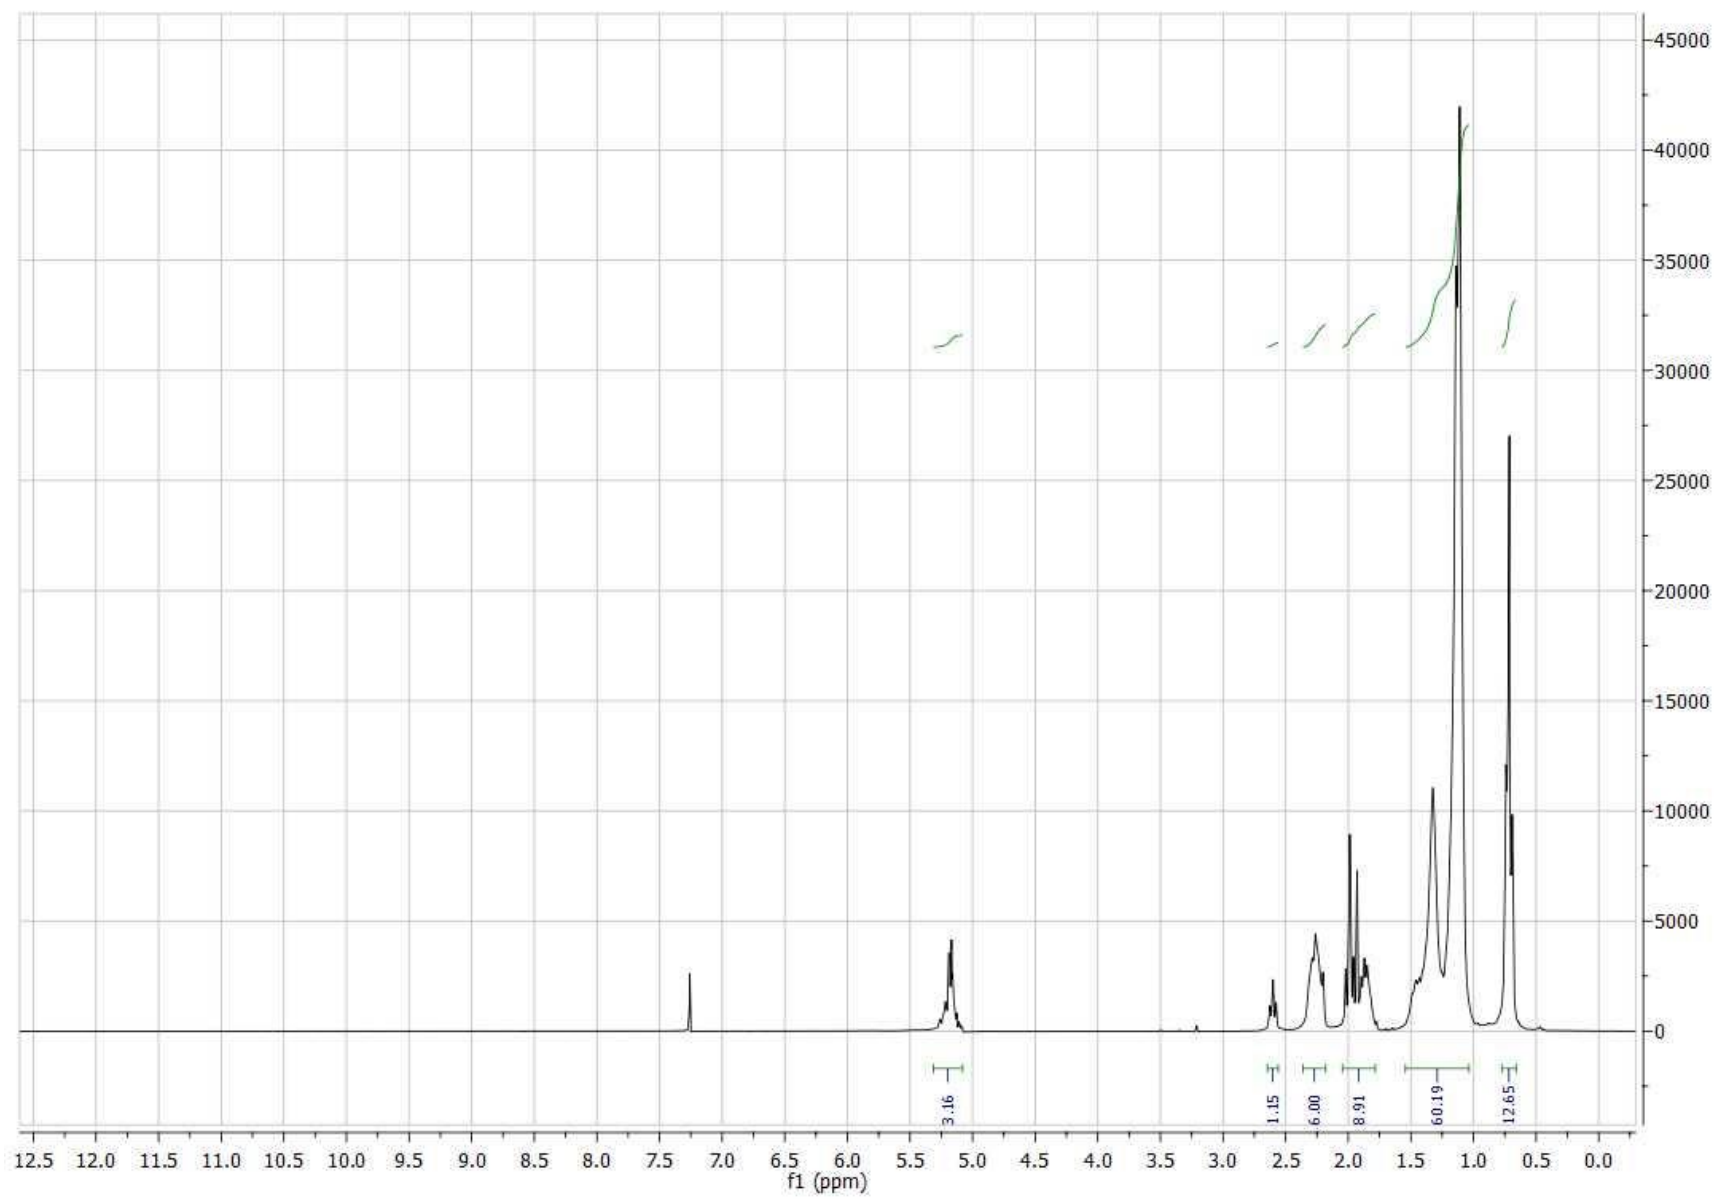

Fig S30:  $^{13}\text{C}$  NMR of **15** at 25 °C

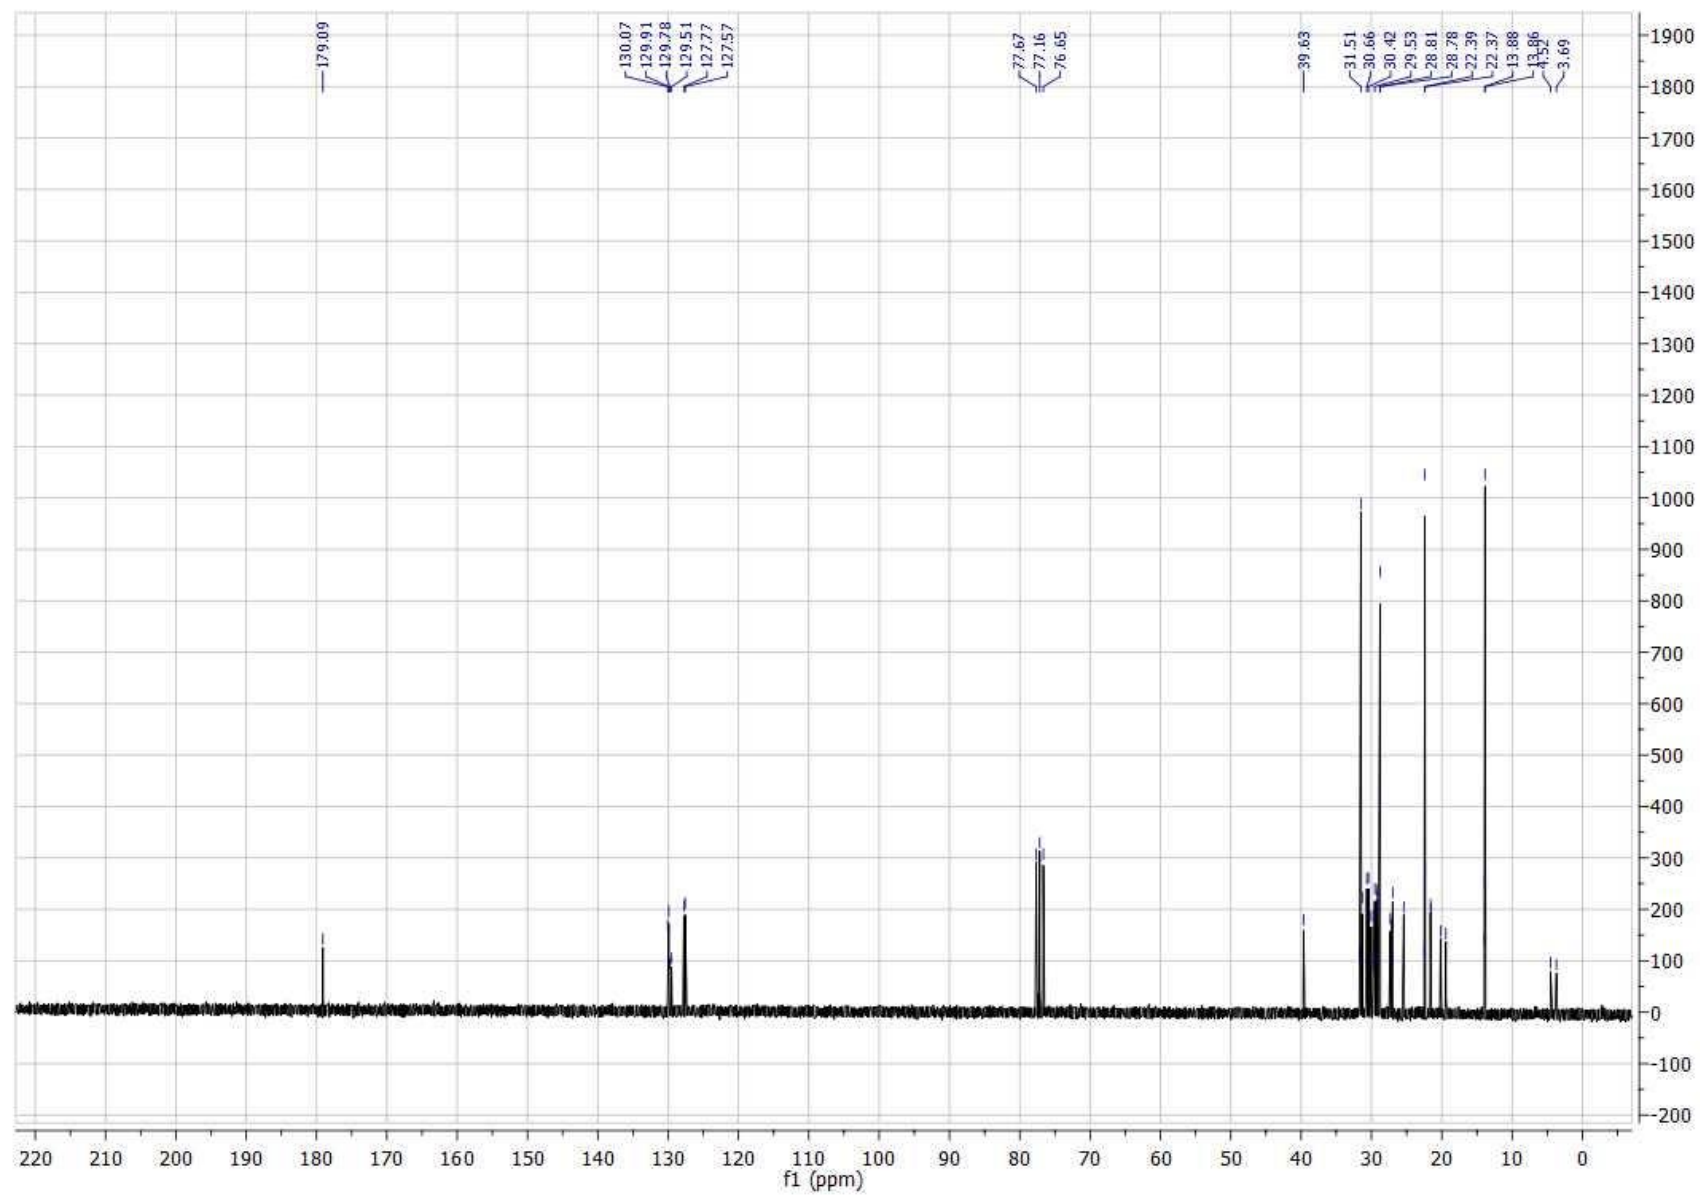

**Table S29.** Peak assignments and integrals of the <sup>1</sup>H-NMR spectrum of **14** at 25°C.

| [P <sub>8881</sub> ]               | [C <sub>18:2</sub> ]        | δ (ppm)     | Shape | Integral |
|------------------------------------|-----------------------------|-------------|-------|----------|
| CHCl <sub>3</sub>                  |                             | 7,26        | s     | -        |
| -                                  | C(9,10,12,13)H <sub>2</sub> | 5,32-5,08   | m     | 3,16     |
| -                                  | C(11)H <sub>2</sub>         | 2,60        | t     | 1,15     |
| C(1,1',1'')H <sub>2</sub>          | -                           | 2,36-2,17   | m     | 6,00     |
| C(1''')H <sub>3</sub>              | C(2)H <sub>2</sub>          | 2,06-1,75   | m     | 8,91     |
| -                                  | C(8,11)H <sub>2</sub>       |             |       |          |
| C(3-7,3',7',3''-7'')H <sub>2</sub> | C(3-15)H <sub>2</sub>       | 1,55-0,97   | m     | 60,19    |
| C(8,8',8'')H <sub>3</sub>          | C(18)H <sub>3</sub>         | 0,81 - 0,58 | m     | 12,65    |

**Table S30.** Peak assignments of the <sup>13</sup>C-NMR spectrum of **14** at 25°C.

| [P <sub>8881</sub> ]                  | [C <sub>18:2</sub> ]    | δ (ppm)            | [P <sub>8881</sub> ]      | [C <sub>18:2</sub> ]  | δ (ppm)   |
|---------------------------------------|-------------------------|--------------------|---------------------------|-----------------------|-----------|
| -                                     | C(1)OO <sup>-</sup>     | 179,1              | -                         | C(8,14)H <sub>2</sub> | 27,3      |
| -                                     | C(9)H <sub>2</sub>      | 130,1              | C(3,3',3'')H <sub>2</sub> | -                     | 27,0      |
| -                                     | C(13)H <sub>2</sub>     | 129,1              | -                         | C(11)H <sub>2</sub>   | 25,4      |
| -                                     | C(10)H <sub>2</sub>     | 127,8              | C(7,7',7'')H <sub>2</sub> | -                     | 22,5      |
| -                                     | C(12)H <sub>2</sub>     | 127,6              | -                         | C(17)H <sub>2</sub>   | 22,4      |
| CDCl <sub>3</sub> , CHCl <sub>3</sub> |                         | 77,5-76,6,<br>77,3 | C(3,3',3'')H <sub>2</sub> | -                     | 21,6;21,5 |
| -                                     | C(2)H <sub>2</sub>      | 39,6               | C(2,2',2'')H <sub>2</sub> | -                     | 20,2;19,4 |
| C(6,6',6'')H <sub>2</sub>             | -                       | 31,5               | -                         | C(18)H <sub>3</sub>   | 13,8      |
| -                                     | C(16)H <sub>2</sub>     | 31,3               | C(8,8',8'')H <sub>2</sub> | -                     | 13,8      |
| -                                     | C(4-8,15)H <sub>2</sub> | 30,7-28,8          | C(1''')H <sub>3</sub>     | -                     | 4,5 ; 3,7 |
| C(4,4',4'')H <sub>2</sub>             | -                       | 28,8               |                           |                       |           |
| C(5,5',5'')H <sub>2</sub>             | -                       | 28,8               |                           |                       |           |
| -                                     | C(3)H <sub>2</sub>      | 27,3               |                           |                       |           |

Fig S31 IR of **1** at 25 °C

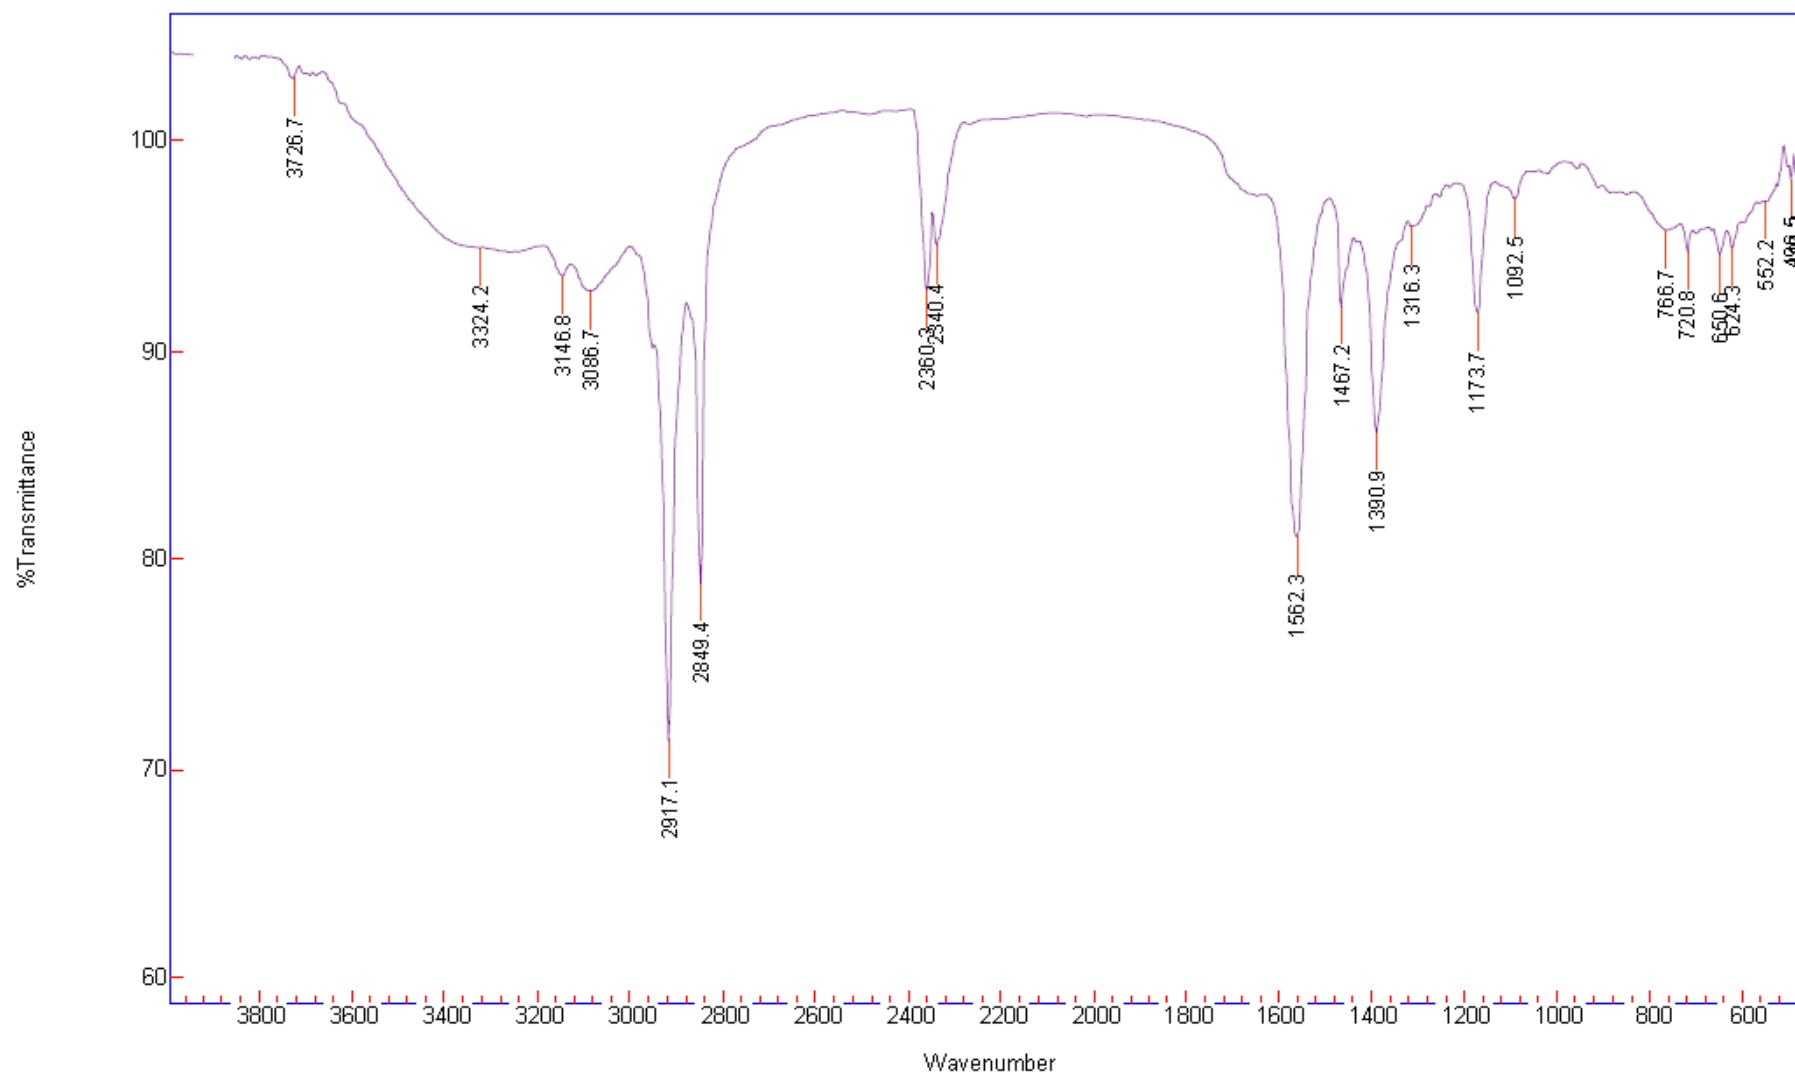

Fig S32 IR of 2 at 25 °C

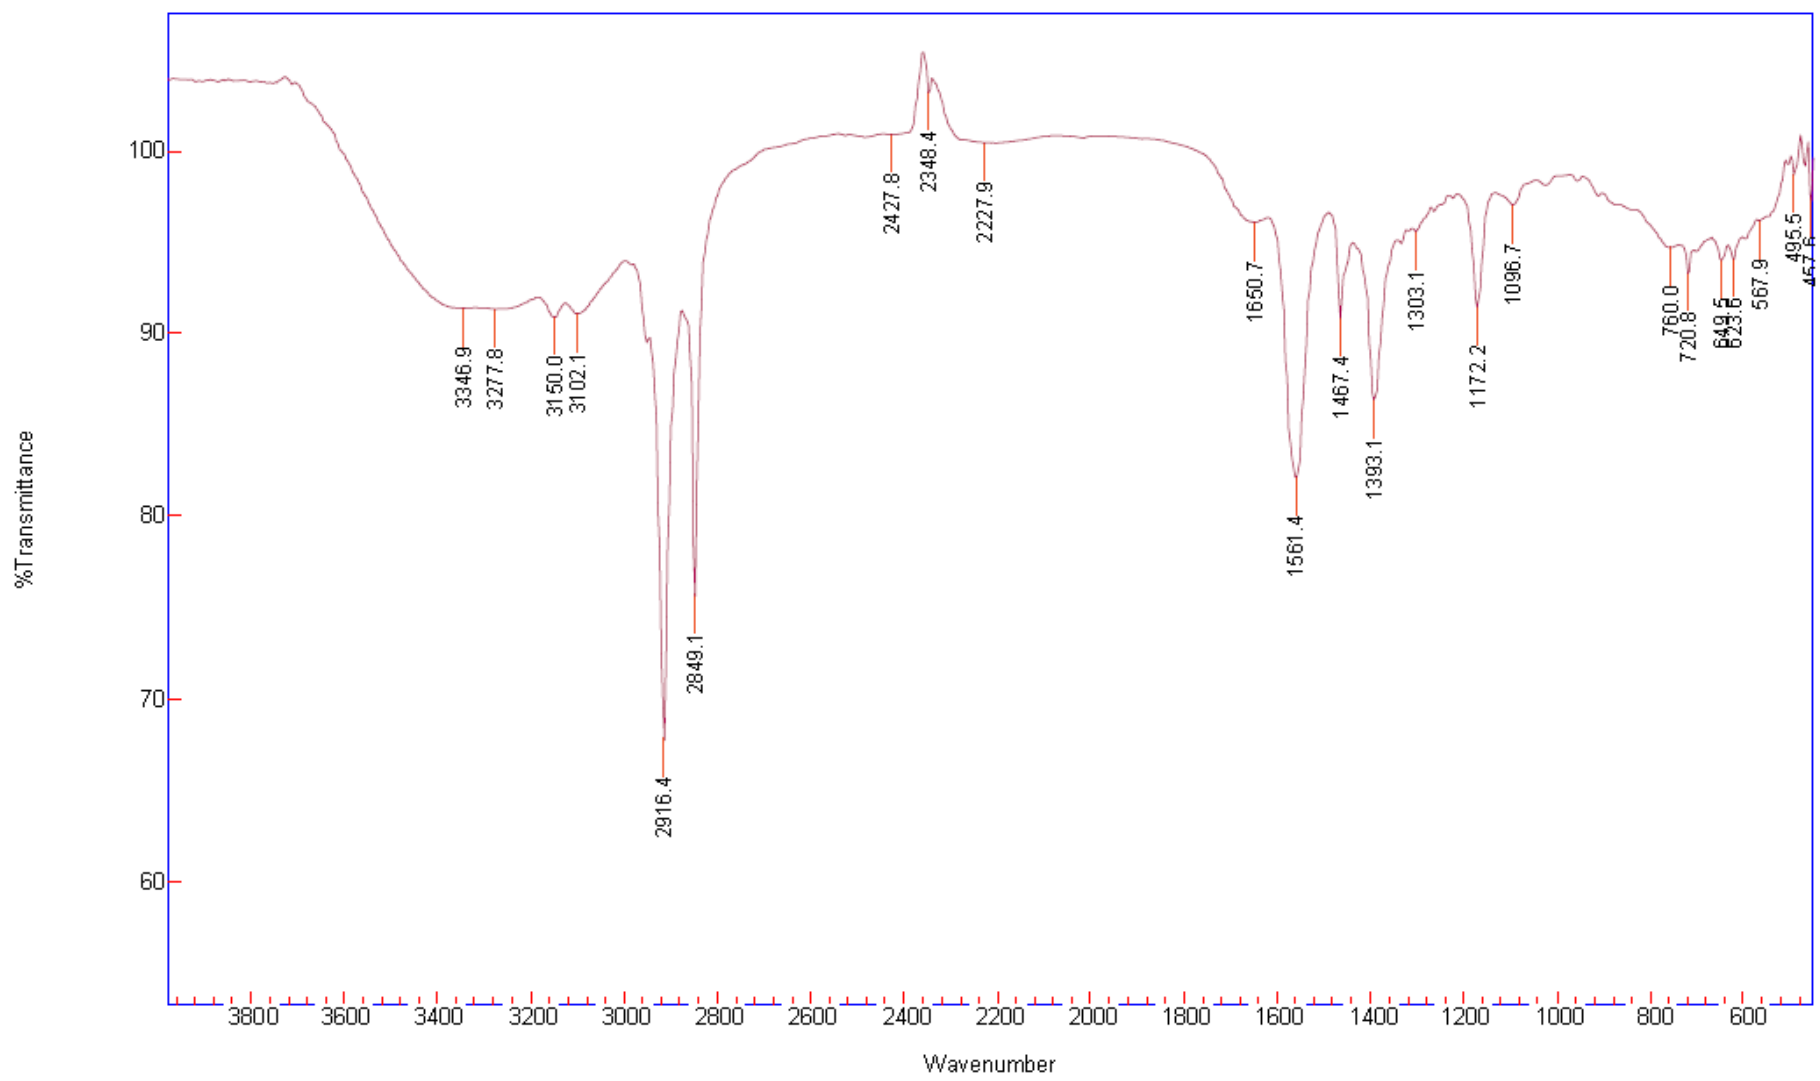



Fig S33 IR of **3** at 25 °C

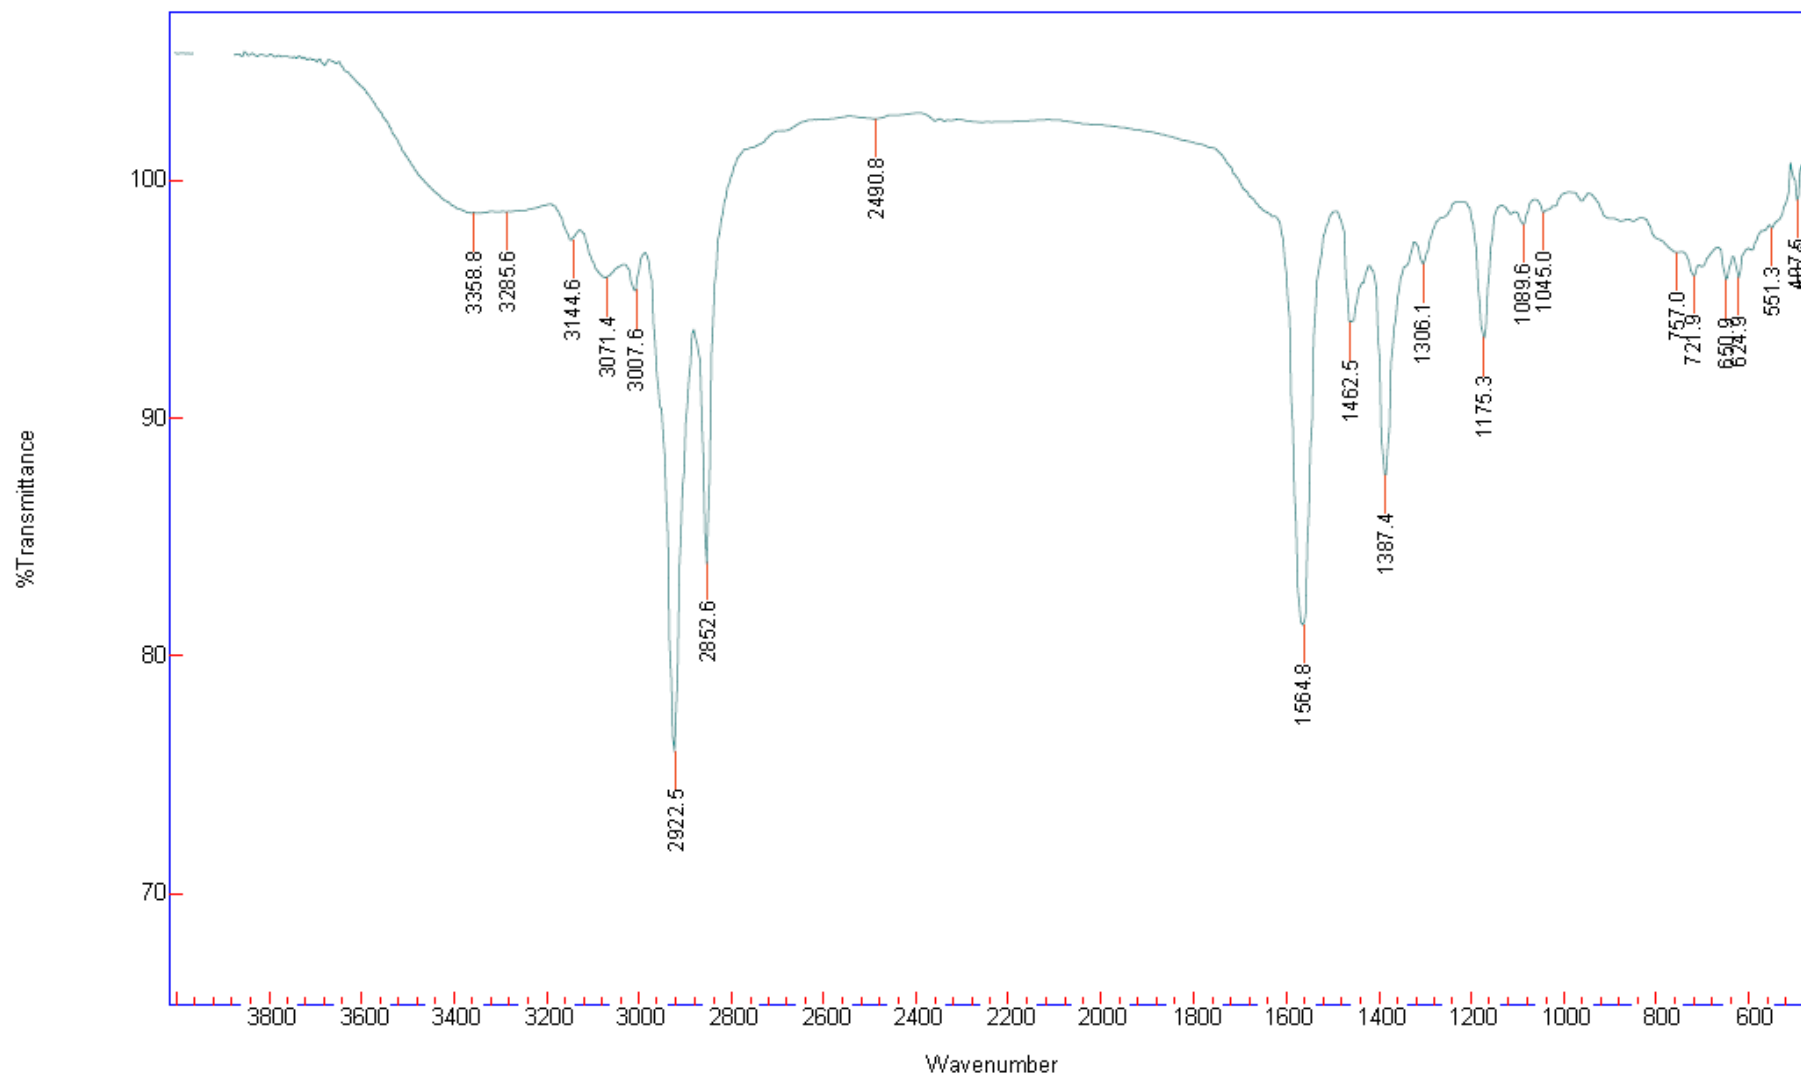

Fig S34 IR of 4 at 25 °C

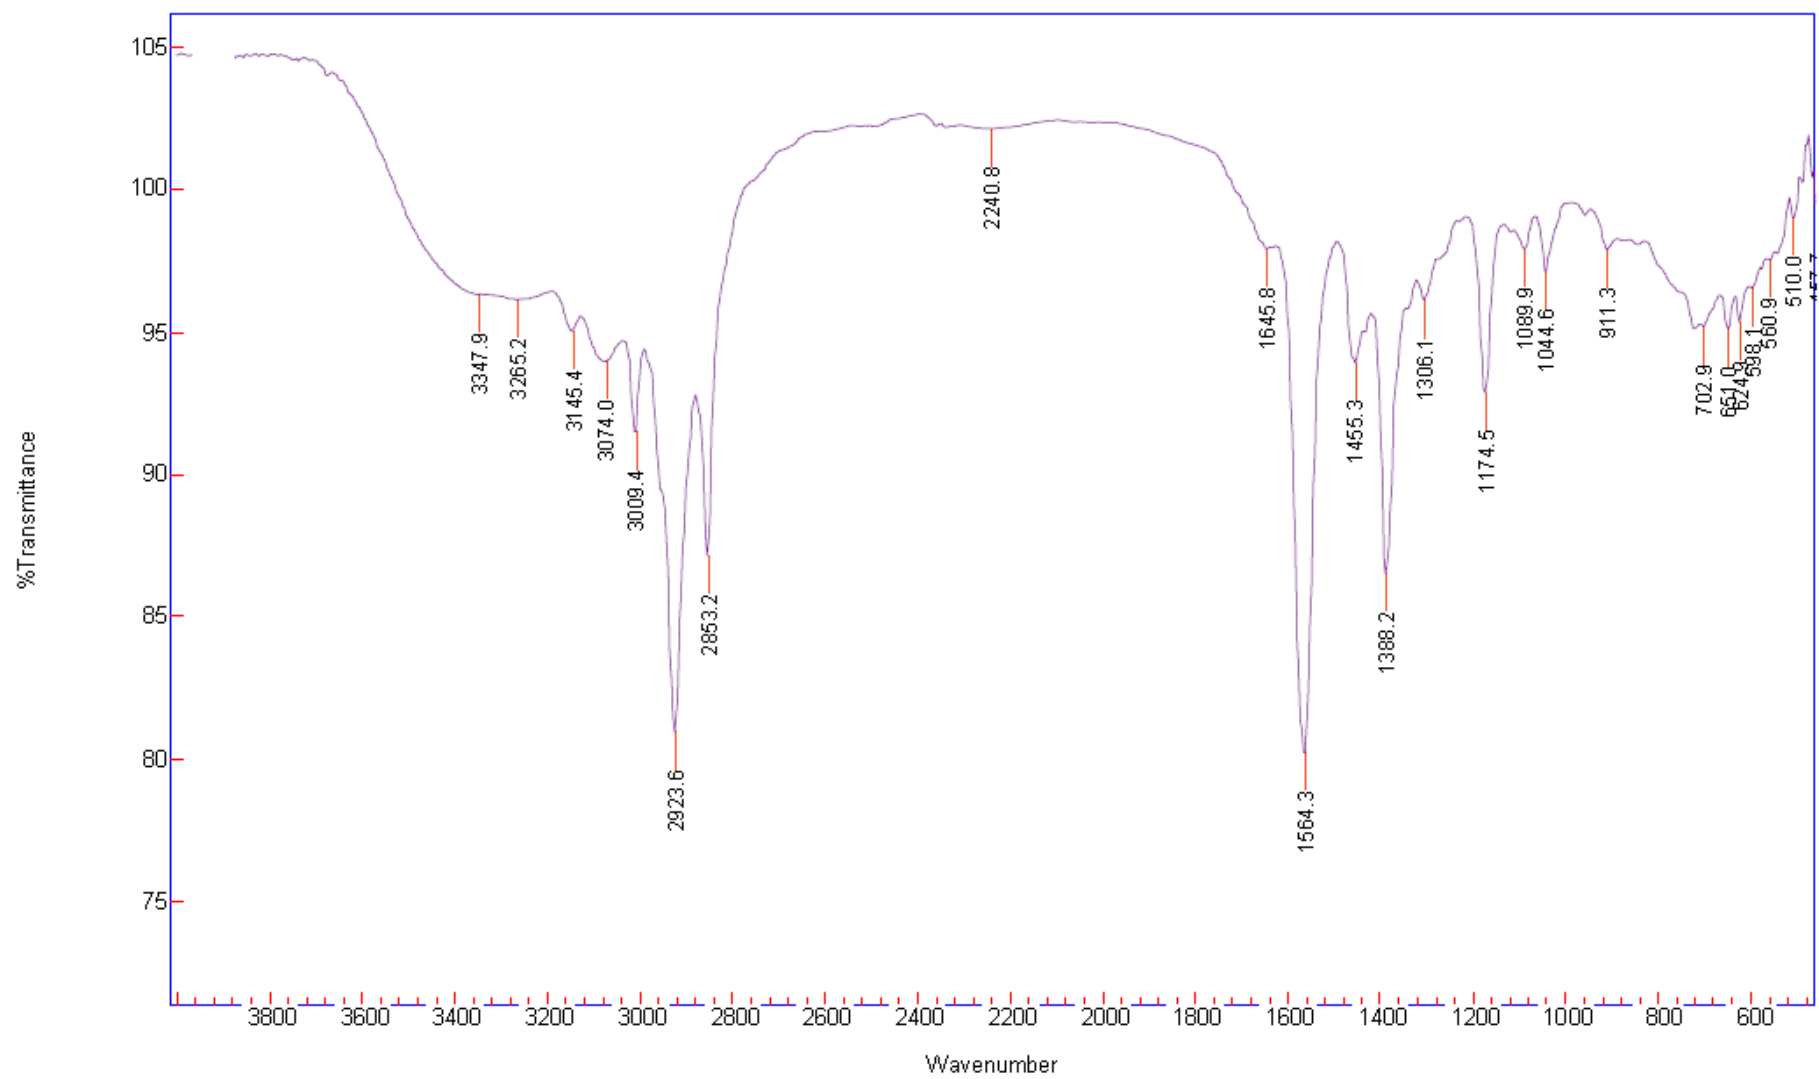

Fig S35 IR of 5 at 25 °C

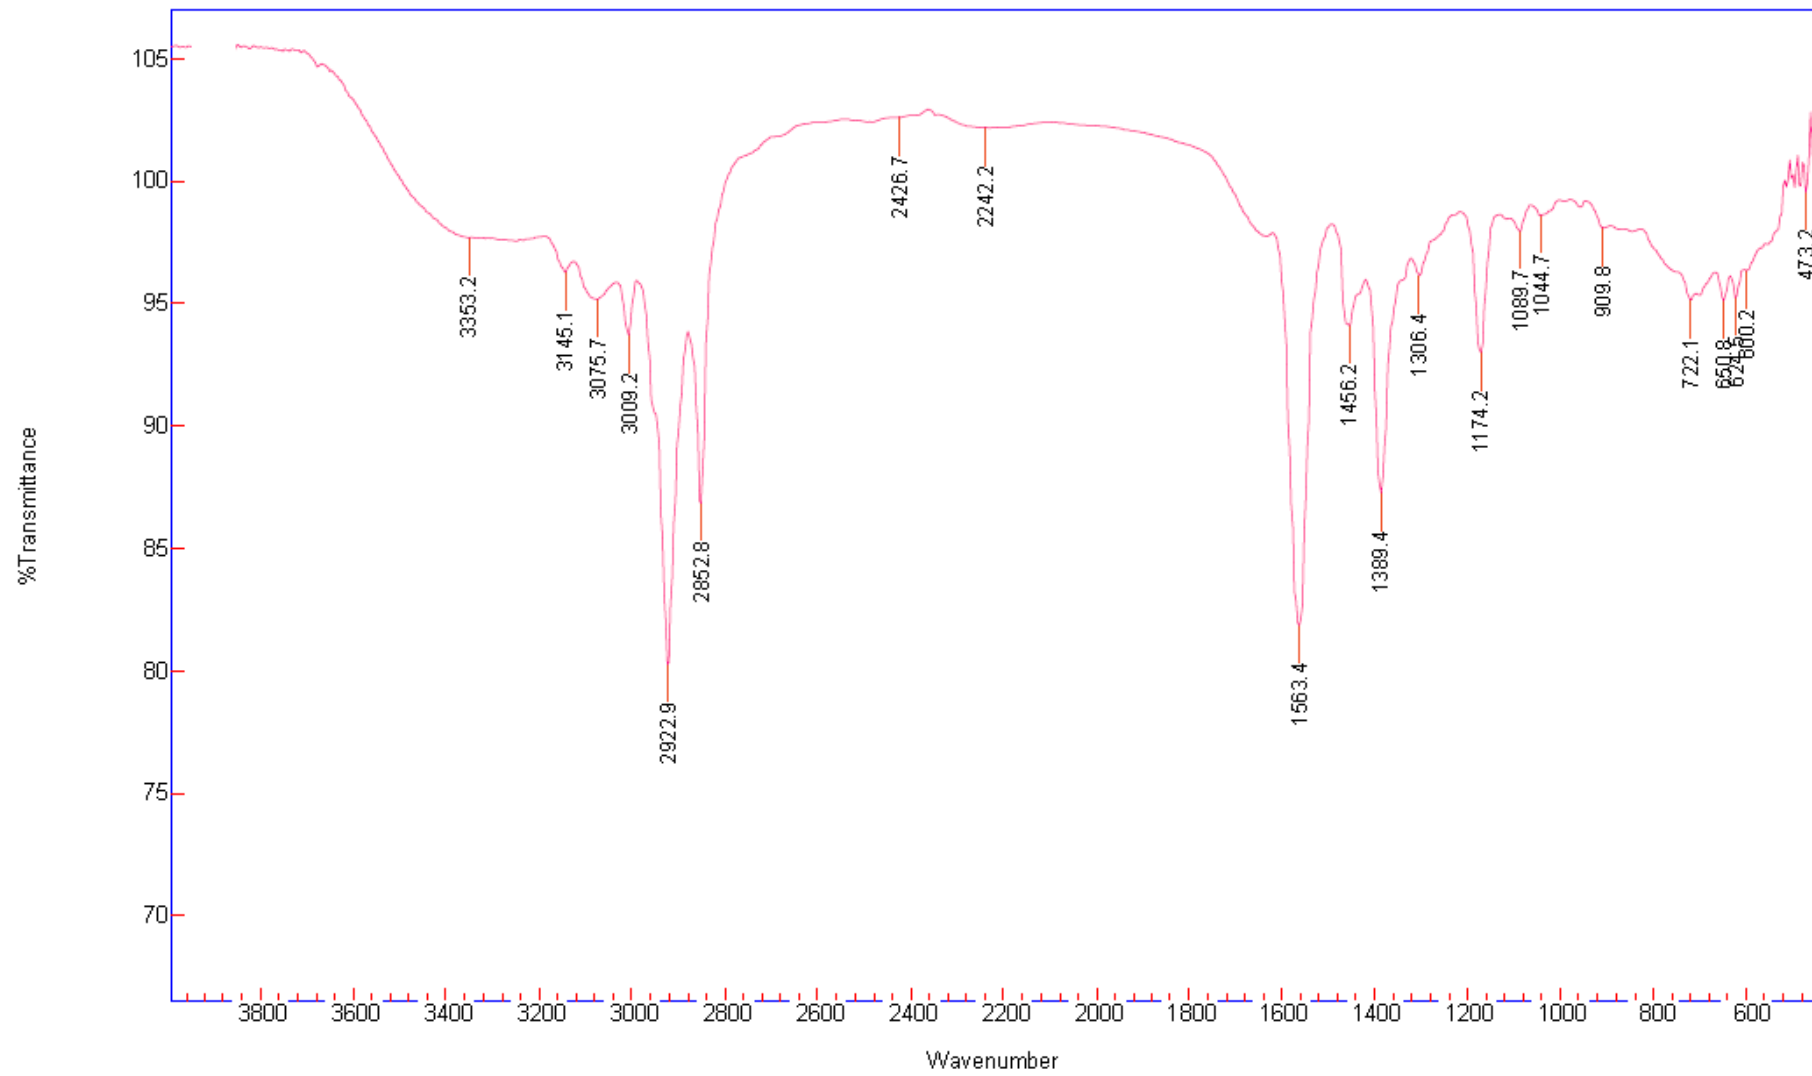

Fig S36 IR of 6 at 25 °C

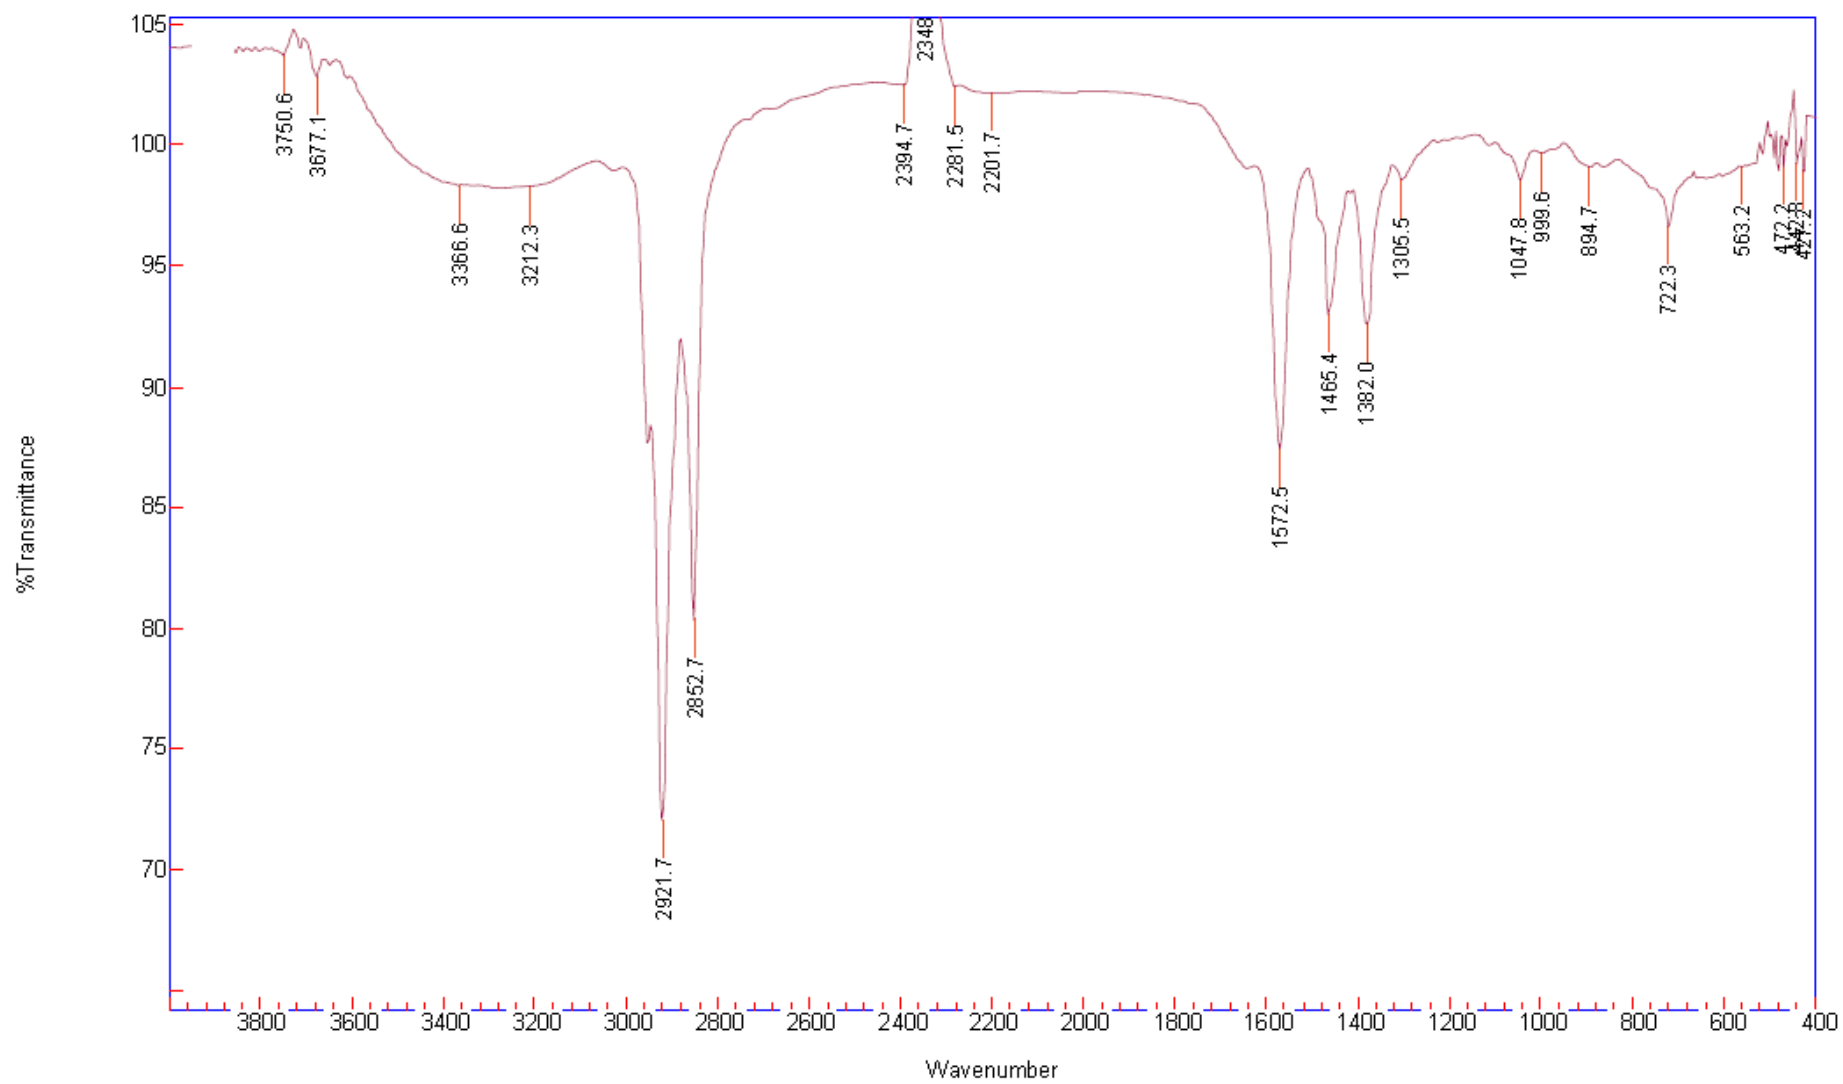

Fig S37 IR of 7 at 25 °C

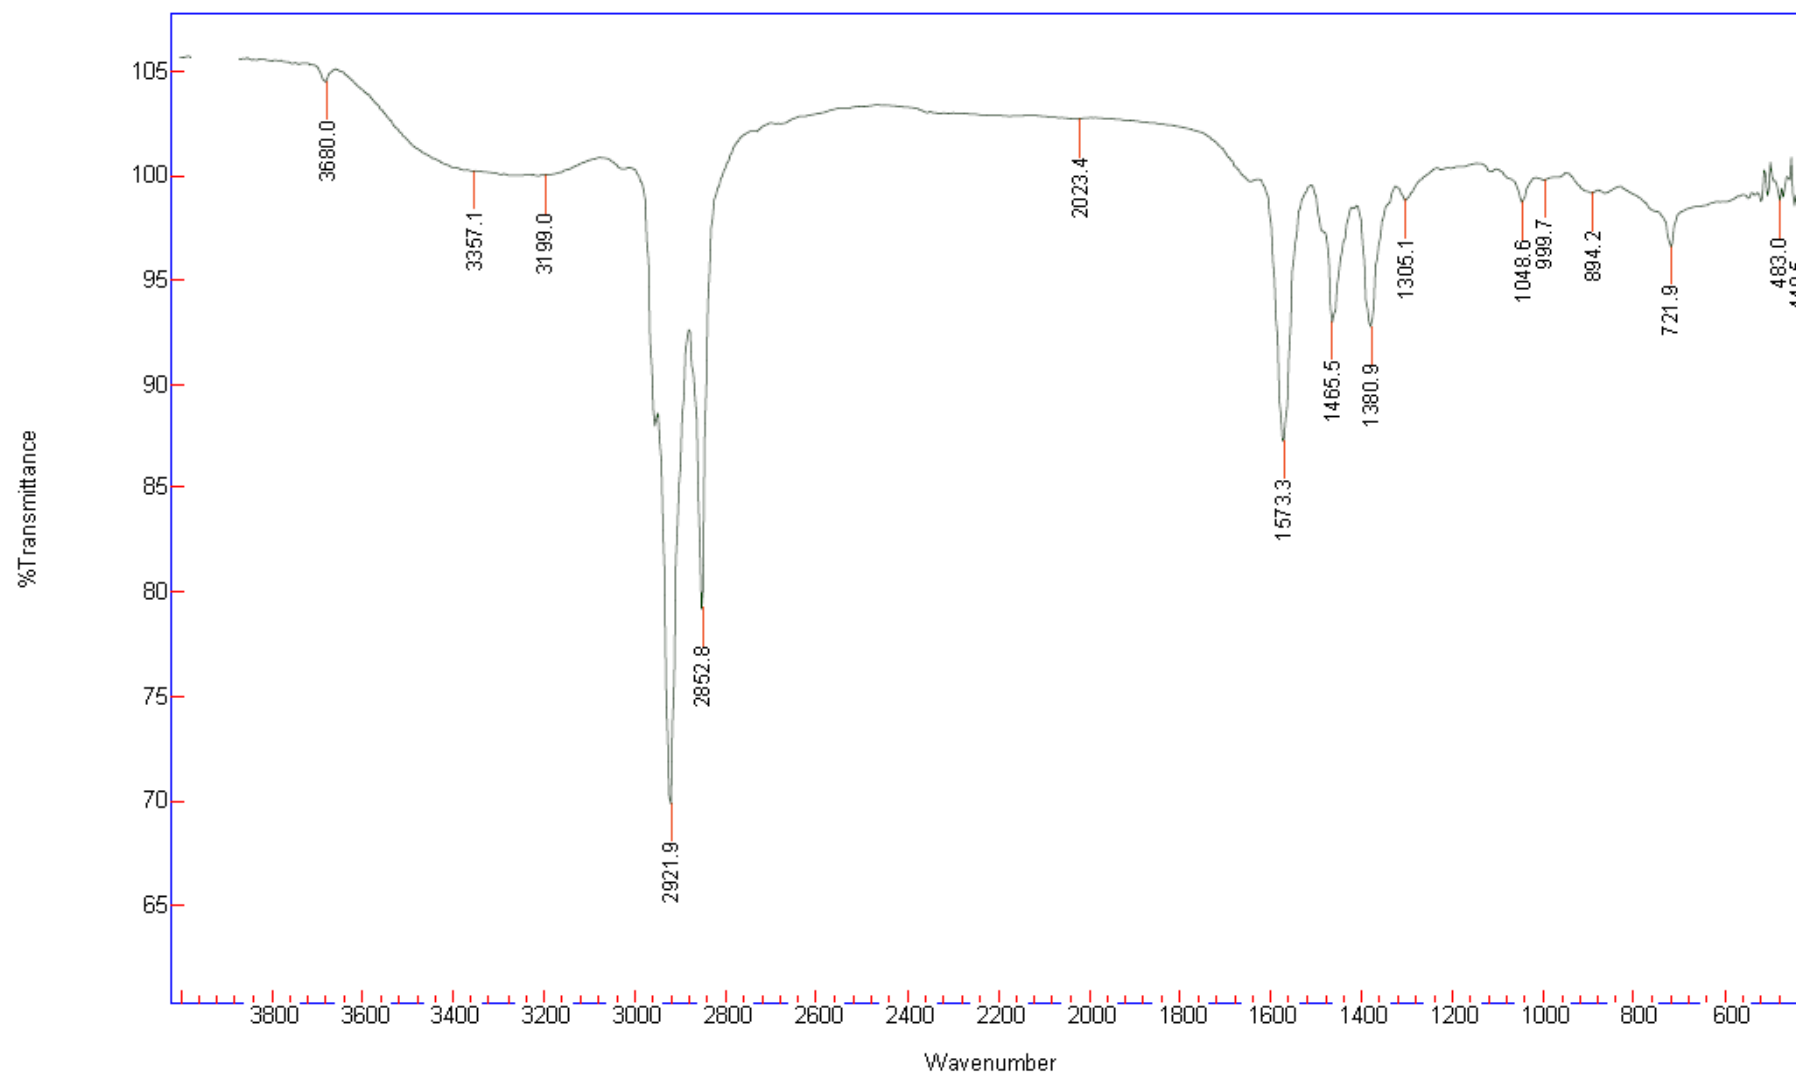

Fig S38 IR of 8 at 25 °C

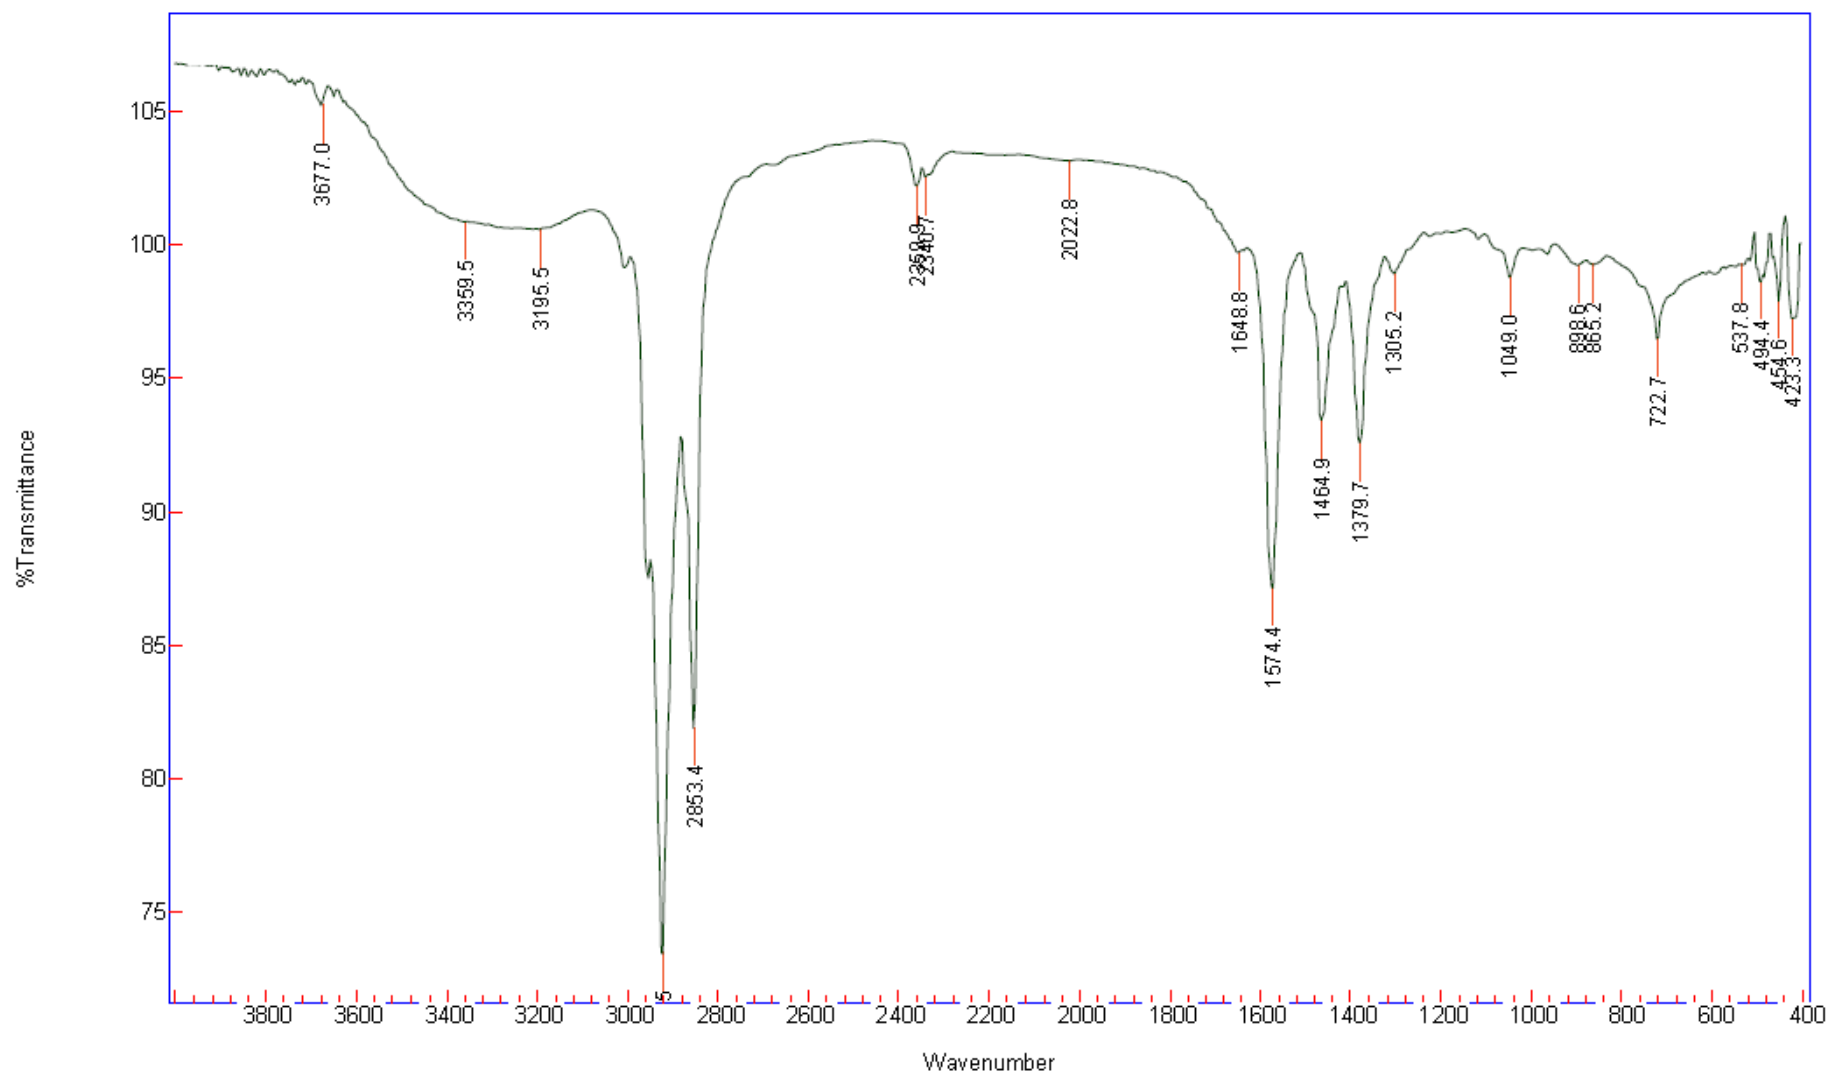

Fig S39 IR of 9 at 25 °C

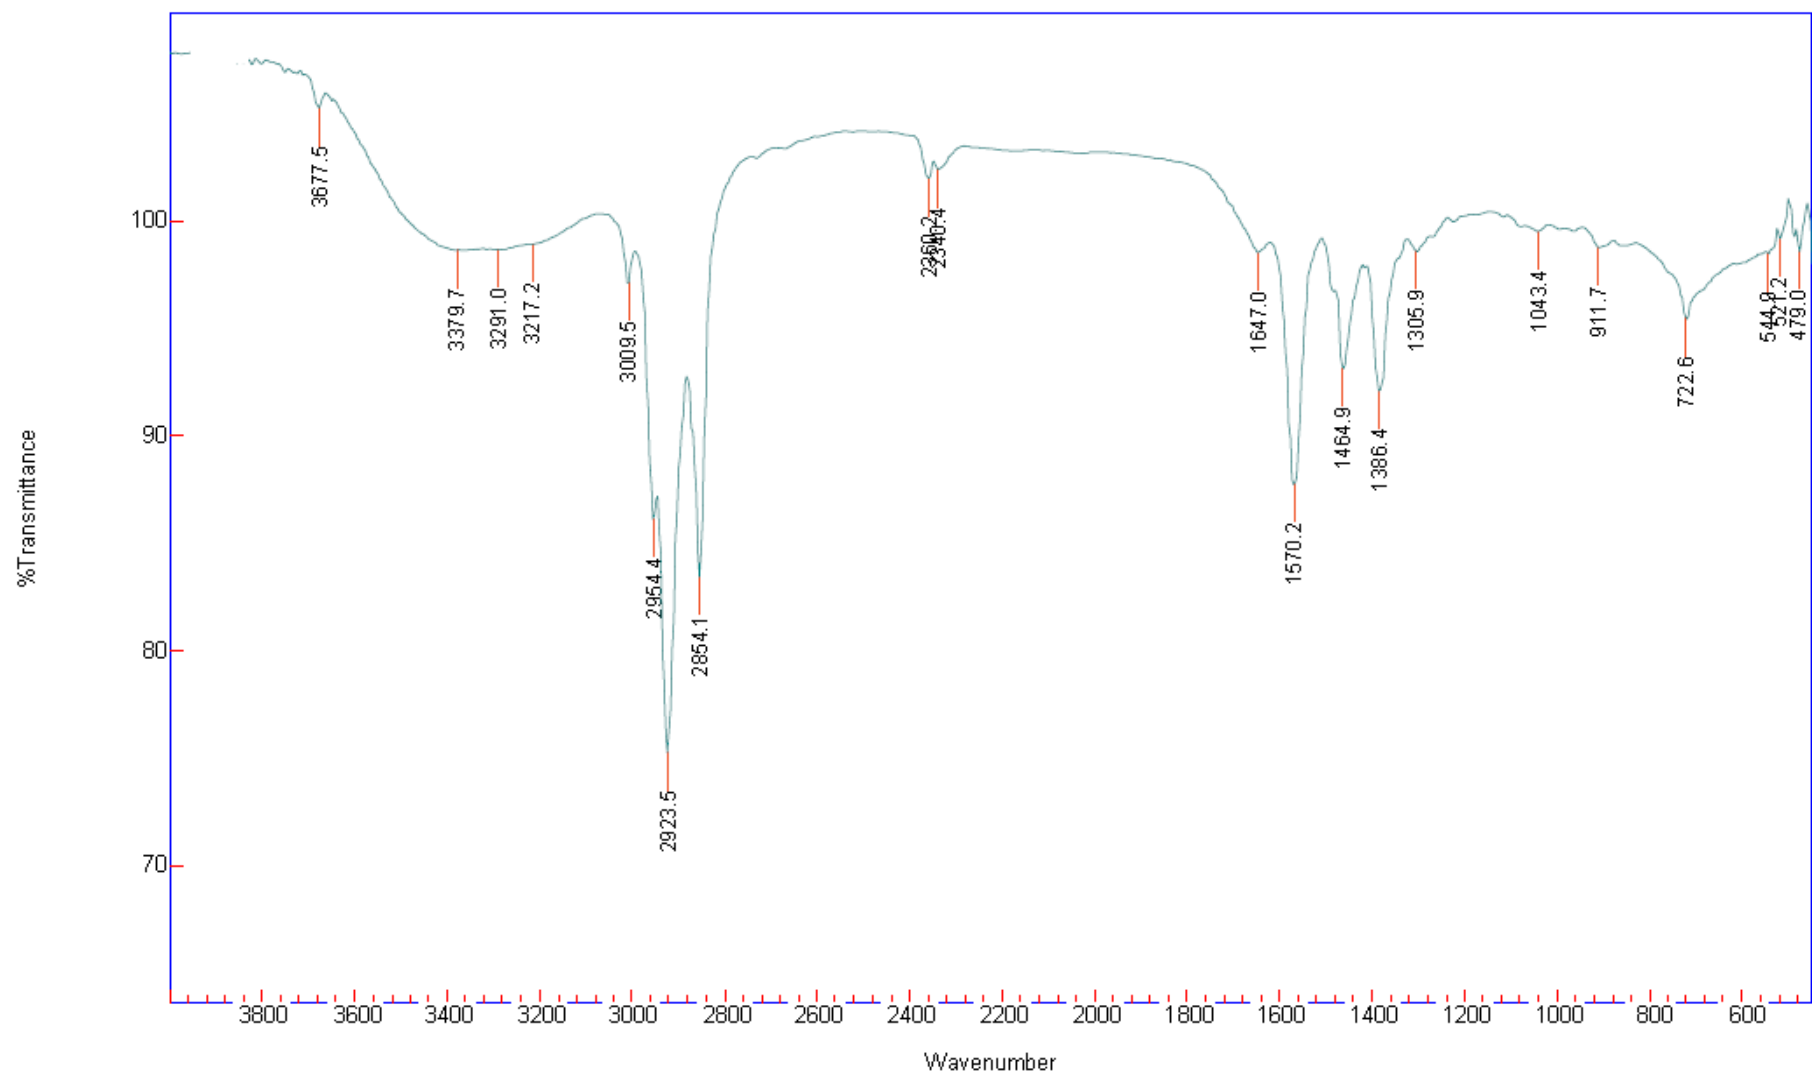

Fig S40 IR of **10** at 25 °C

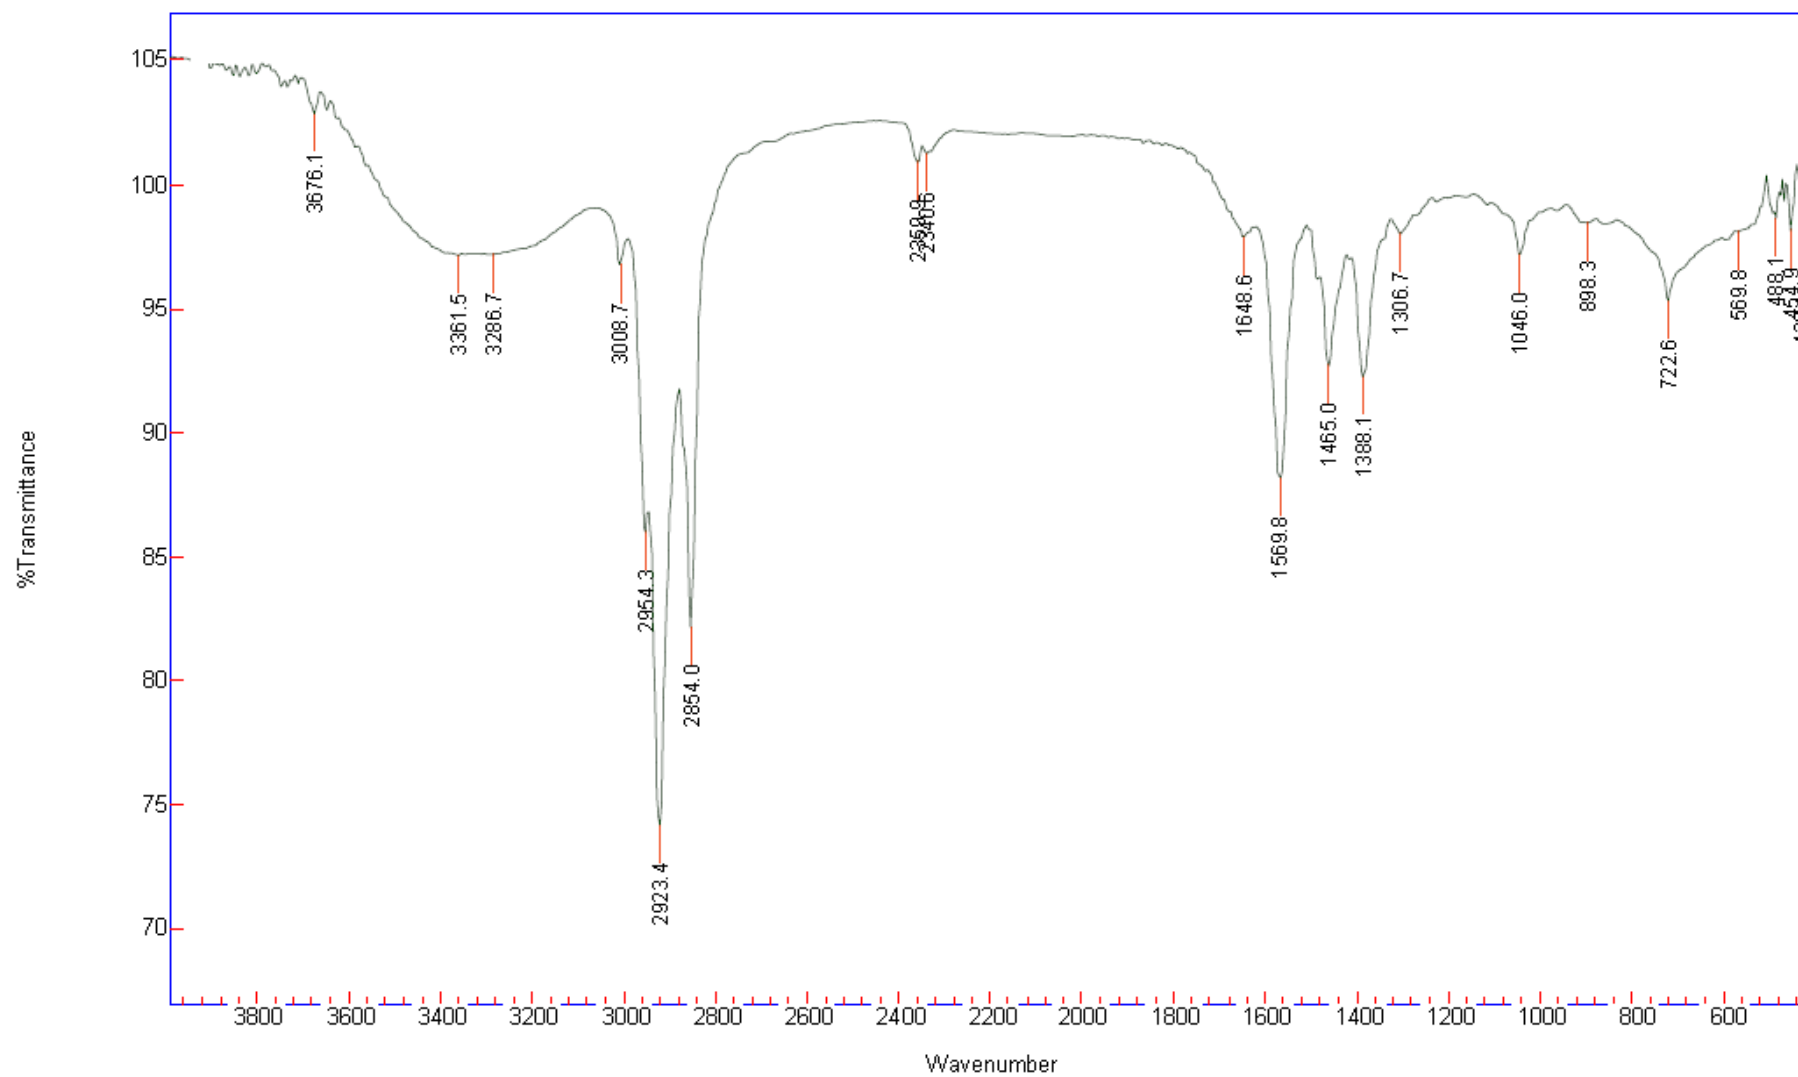



Fig S41 IR of **11** at 25 °C

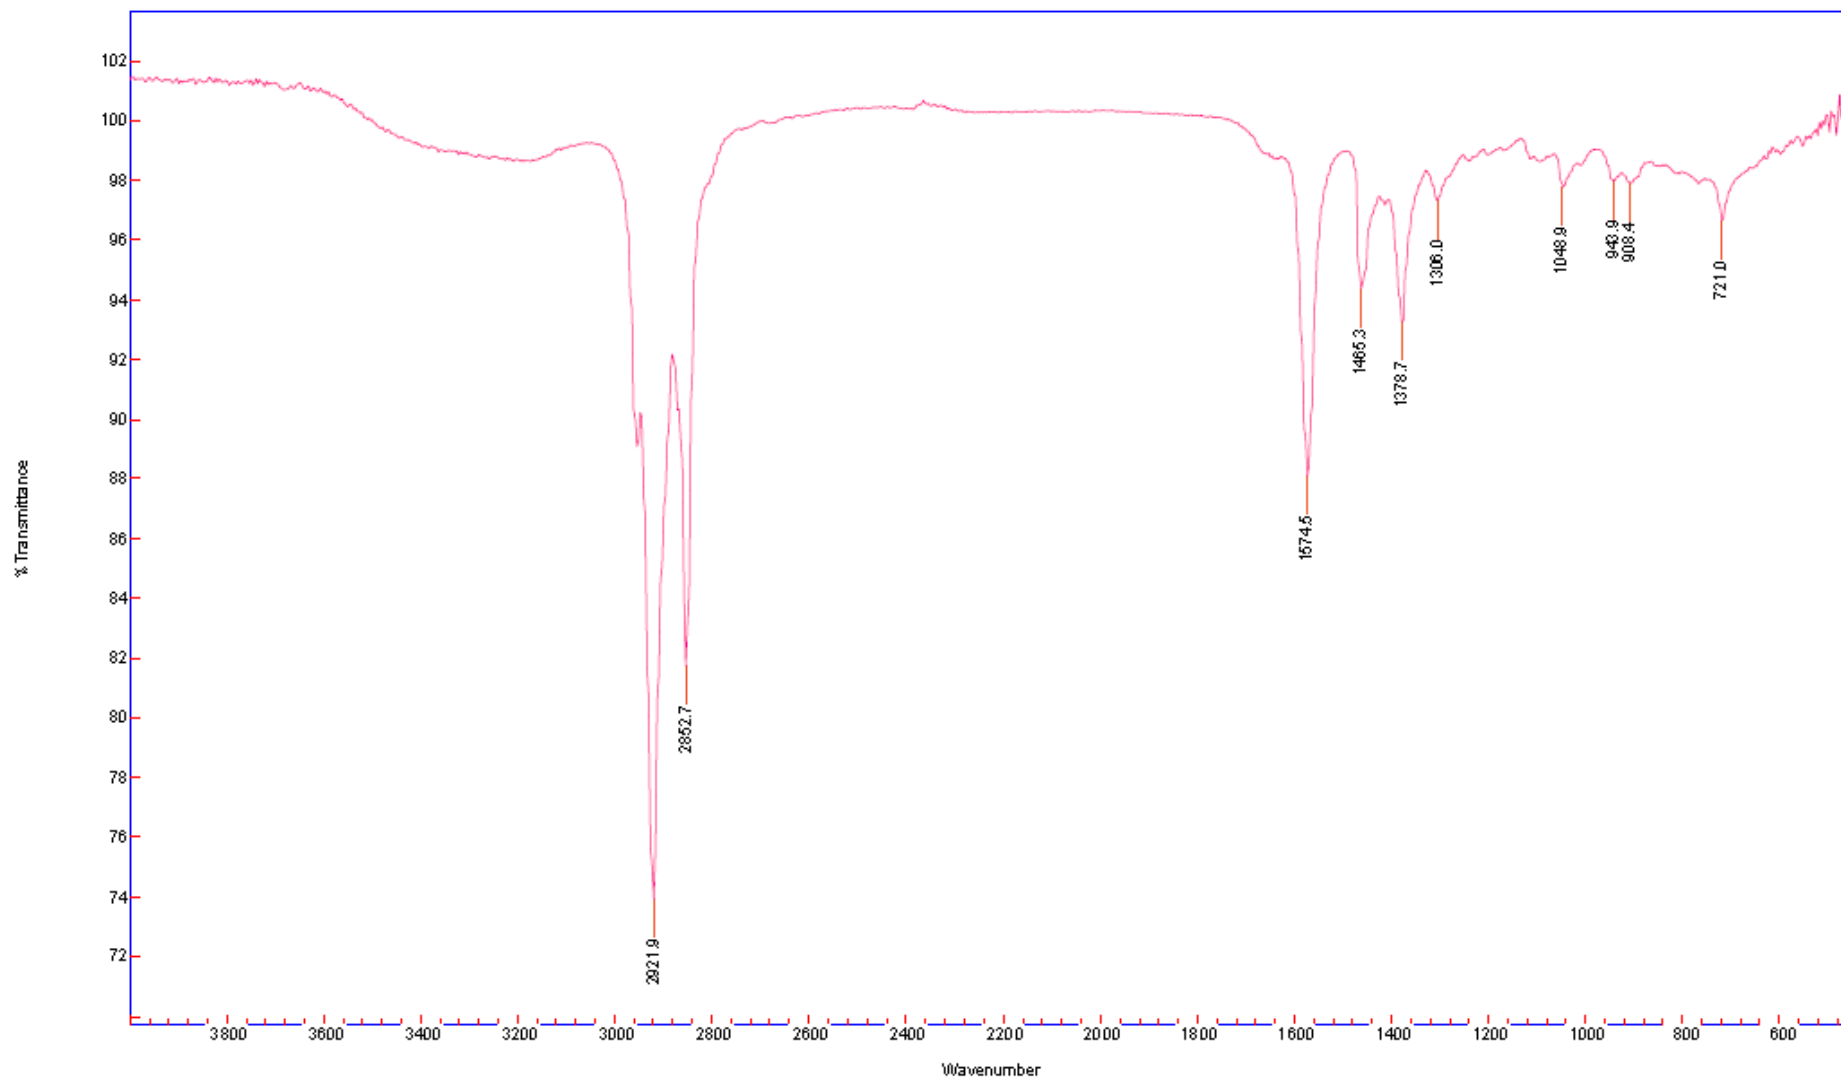

Fig S42 IR of **12** at 25 °C

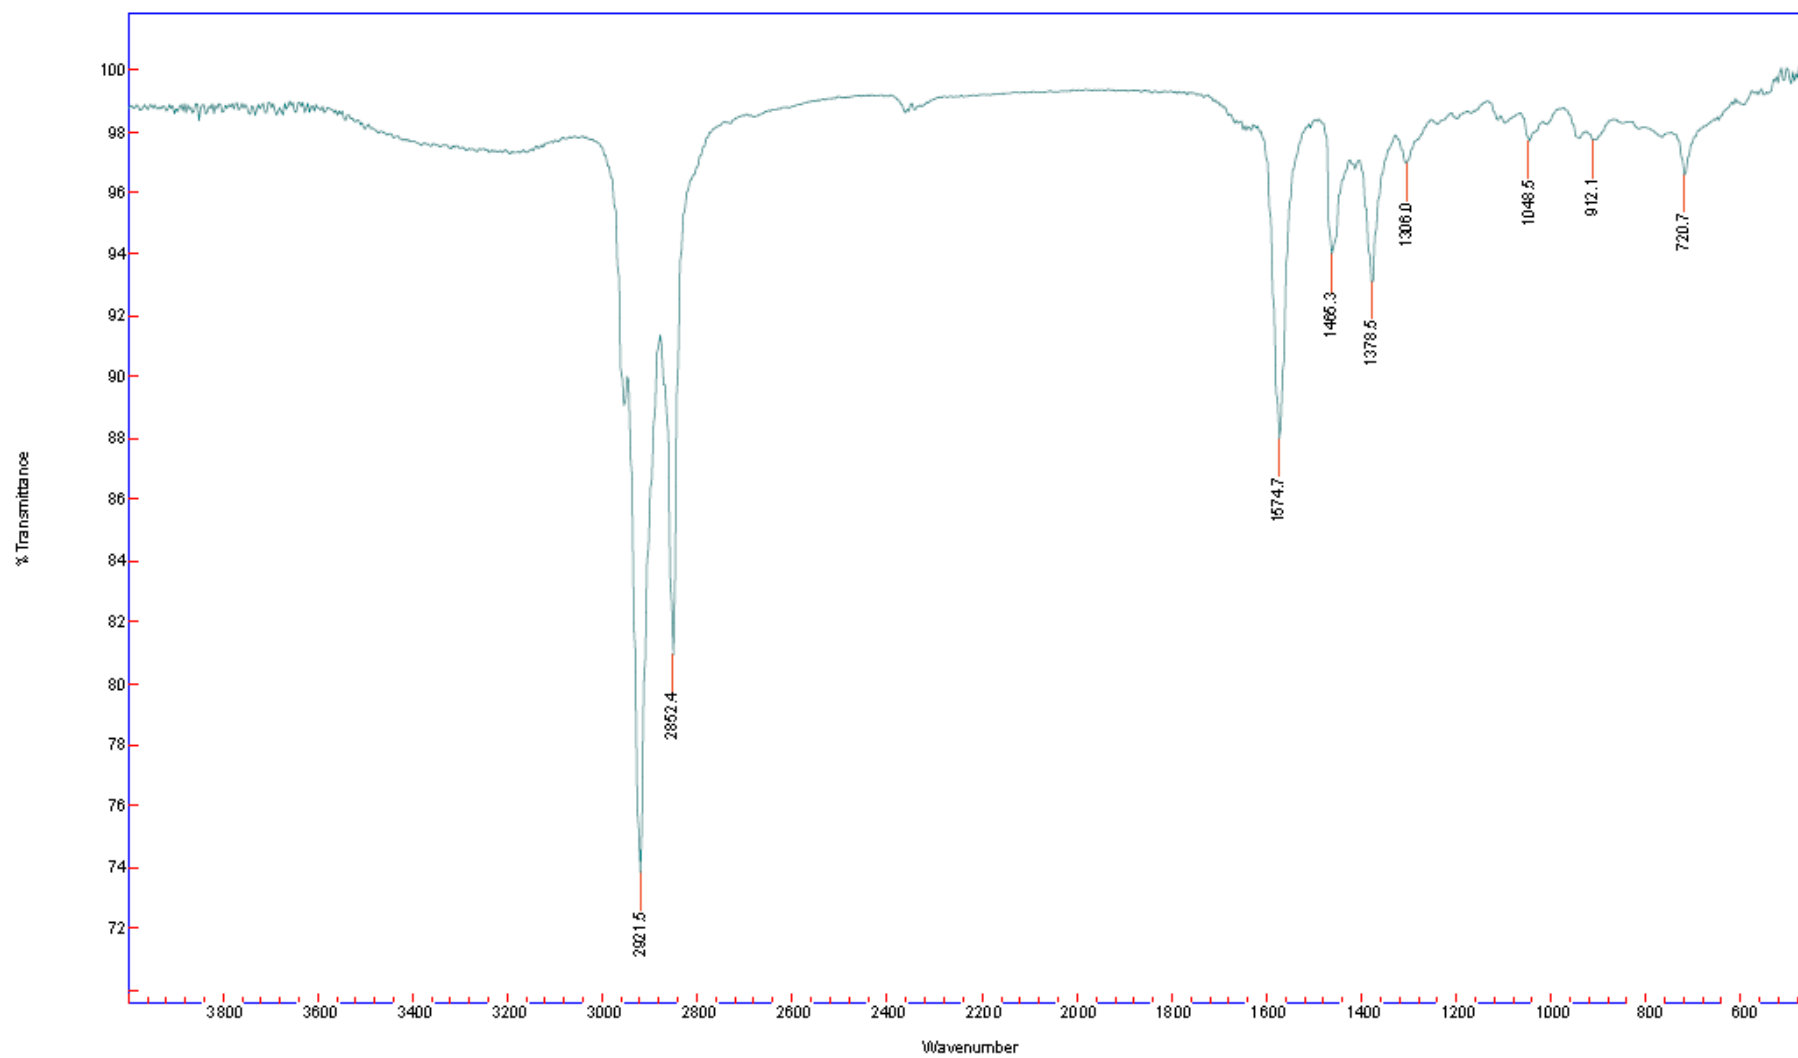

Fig S43 IR of 13 at 25 °C

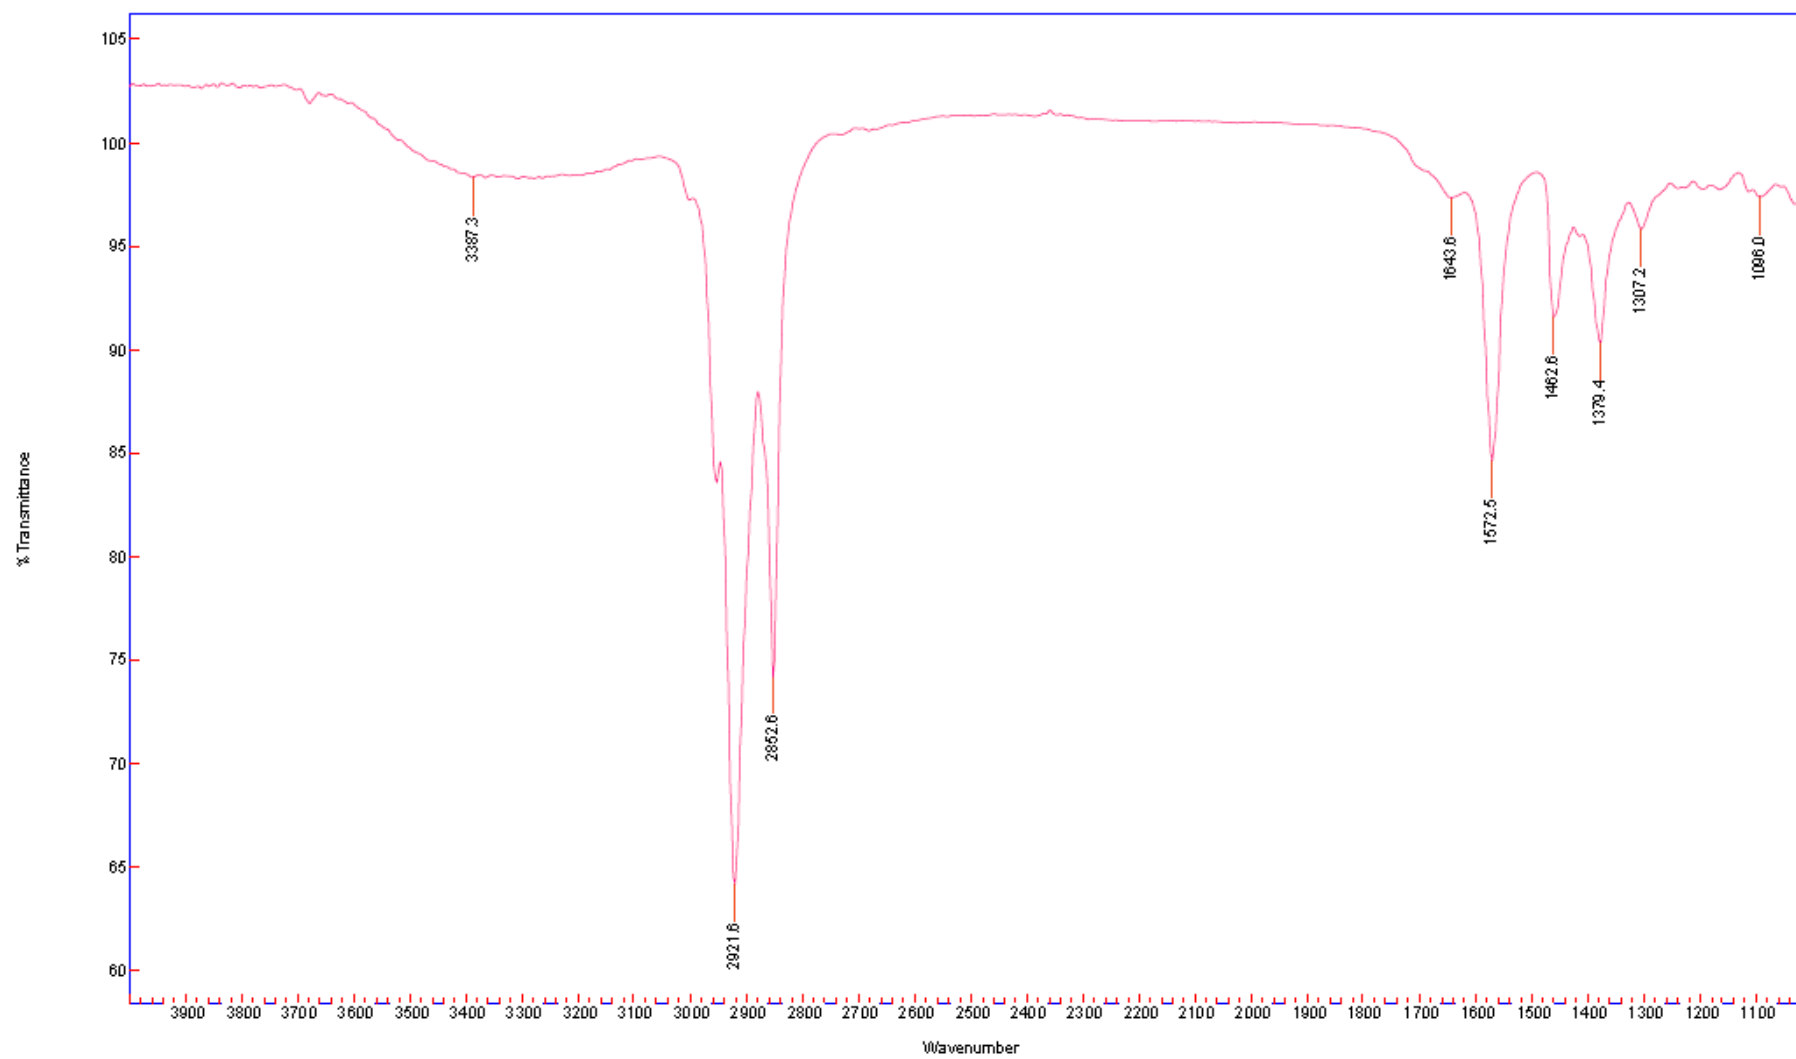

Fig S44 IR of **14** at 25 °C

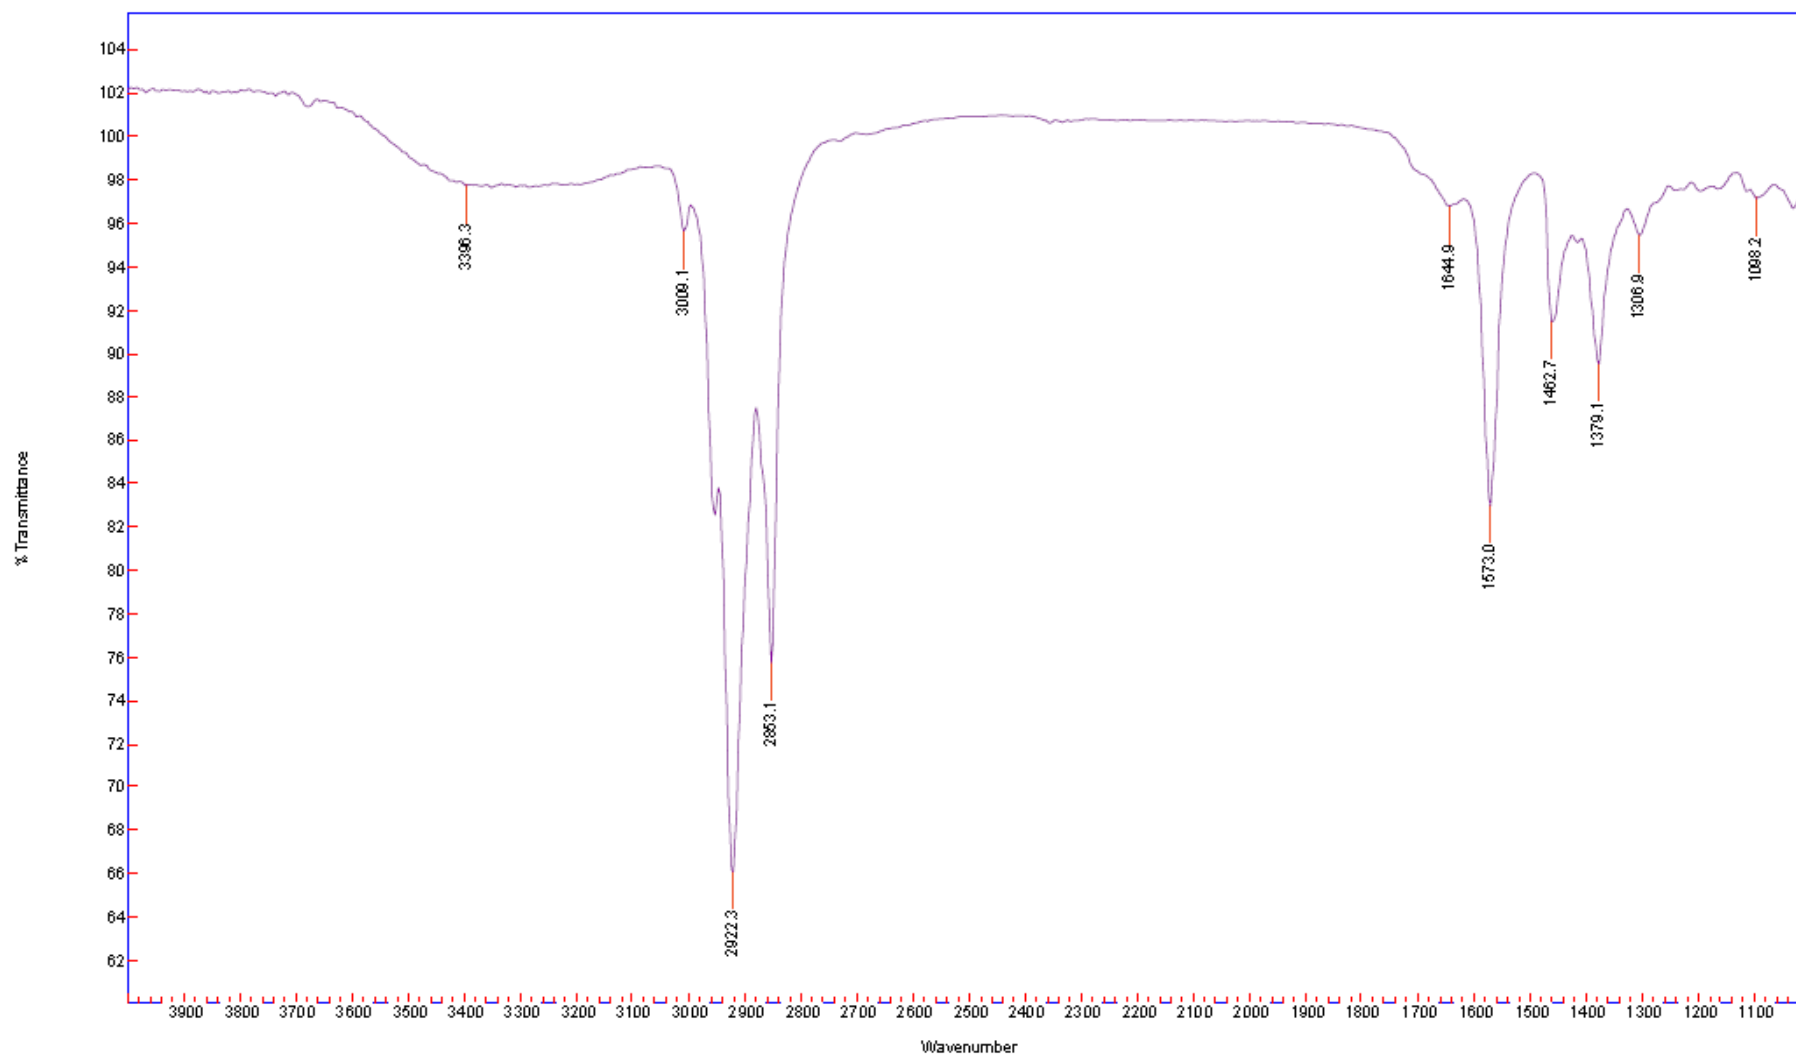

Fig S45 IR of 15 at 25 °C

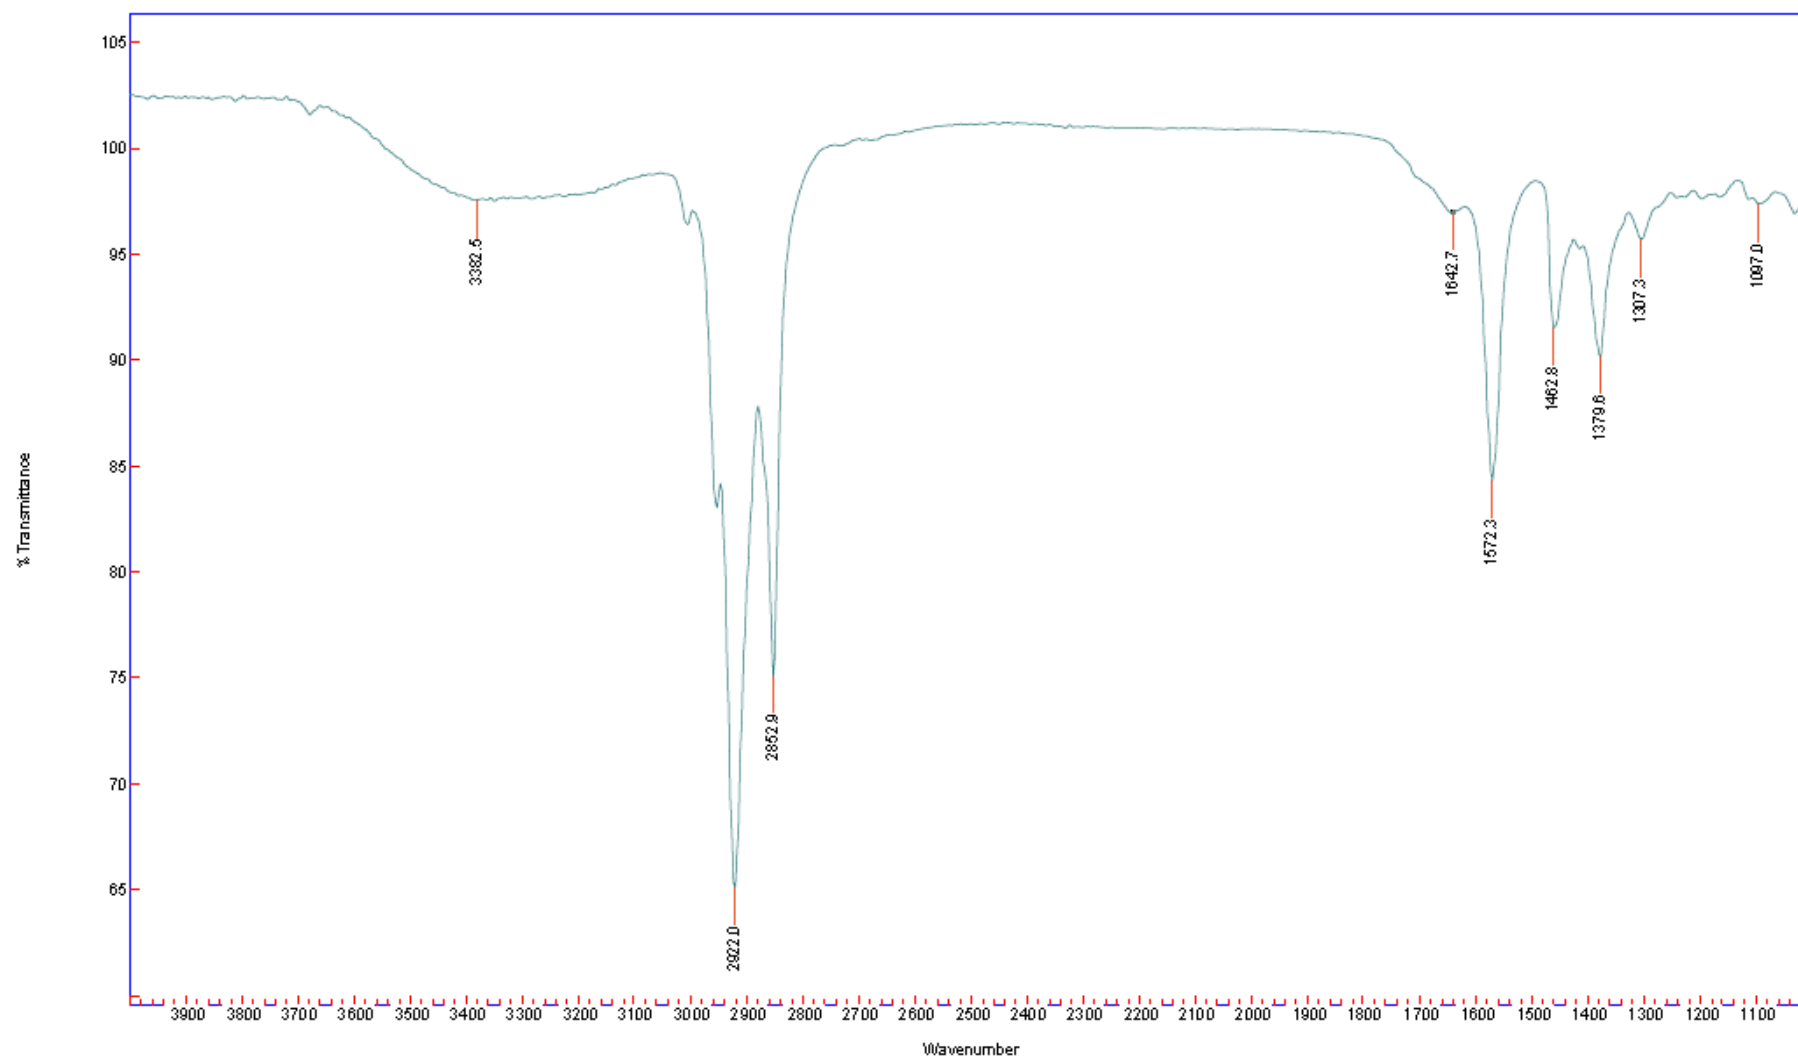

**Fig S46** Thermal gravimetric analysis (TGA) of [EMIM] series.

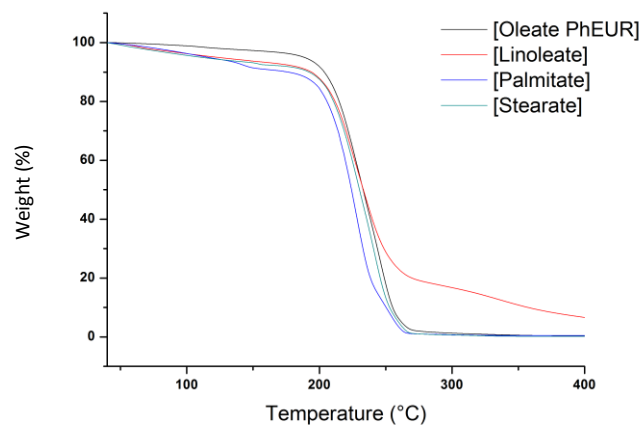

**Fig S47** Thermal gravimetric analysis (TGA) of [N<sub>8881</sub>] series.

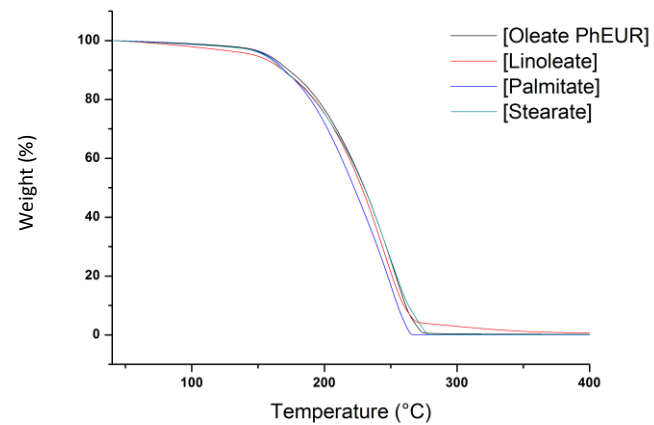

**Fig S48** Thermal gravimetric analysis (TGA) of [P<sub>8881</sub>] series.

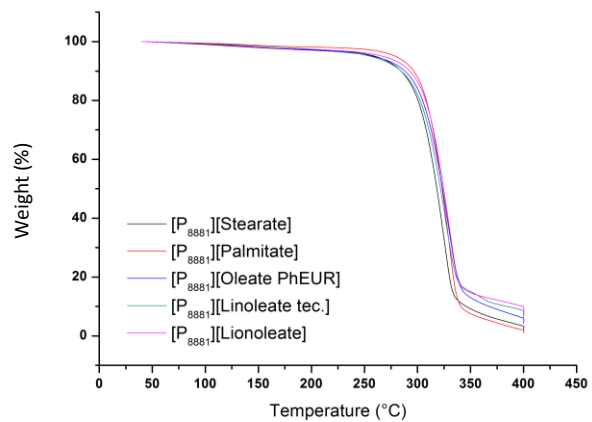

**Table S31.** Comparison of the viscosity as a function of the temperature of [N<sub>8881</sub>] and [P<sub>8881</sub>] series.

| T    | [N <sub>8881</sub> ] |       |                           |         | [P <sub>8881</sub> ] |       |                           |         |
|------|----------------------|-------|---------------------------|---------|----------------------|-------|---------------------------|---------|
| °C   | [C16]                | [C18] | [C18:1 <sub>PhEur</sub> ] | [C18:2] | [C16]                | [C18] | [C18:1 <sub>PhEur</sub> ] | [C18:2] |
| 20   | 2463                 | 1998  | 1283                      | 1385    | 774.1                | 720.2 | 585.7                     | 552.0   |
| 22,5 | 1989                 | 1605  | 1075                      | 1172    | -                    | -     | -                         | -       |
| 25   | 1615                 | 1342  | 929.1                     | 985.6   | 556.6                | 529.0 | 435.9                     | 415.6   |
| 30   | 1127                 | 940.2 | 656.2                     | 727.2   | 415.0                | 392.1 | 333.7                     | 312.4   |
| 35   | 792.2                | 675.2 | 495.8                     | 531.3   | 312.0                | 301.4 | 258.9                     | 241.6   |
| 40   | 595.4                | 494.6 | 362.9                     | 407.2   | 244.3                | 229.7 | 199.8                     | 190.1   |
| 45   | 429.4                | 355.6 | 273.5                     | 311.8   | 184.6                | 177.5 | 157.1                     | 149.8   |
| 50   | 313.0                | 272.2 | 220.4                     | 242.8   | 145.3                | 142.1 | 126.0                     | 120.8   |
| 60   | 175.7                | 167.5 | 135.7                     | 154.9   | 95.24                | 91.22 | 83.00                     | 80.00   |
| 70   | 109.8                | 107.2 | 93.41                     | 104.01  | 65.15                | 64.44 | 58.91                     | 57.31   |
| 80   | 75.76                | 74.28 | 68.57                     | 72.01   | 46.61                | 46.39 | 42.66                     | 40.97   |

Fig S49. Comparison of the Arrhenius fitting of a) [N<sub>8881</sub>] and b) [P<sub>8881</sub>] series.

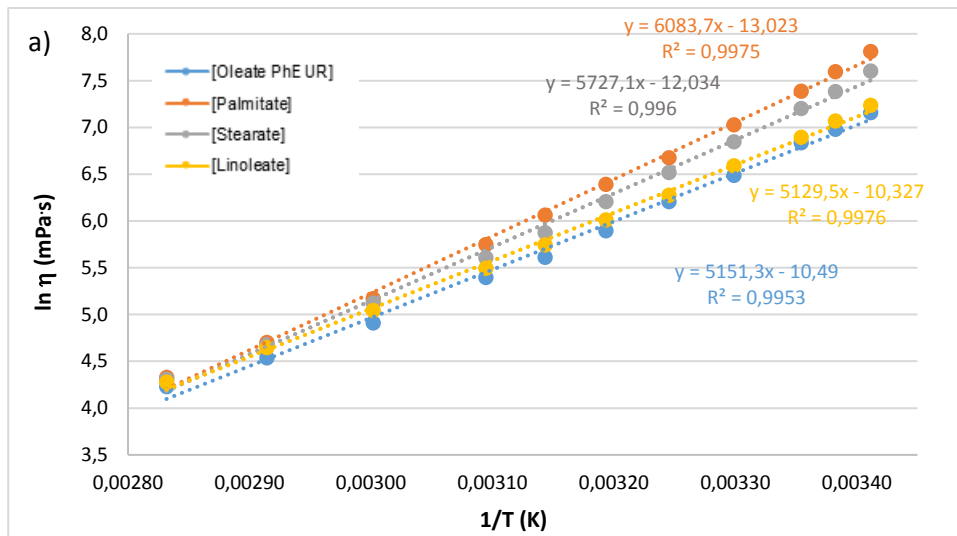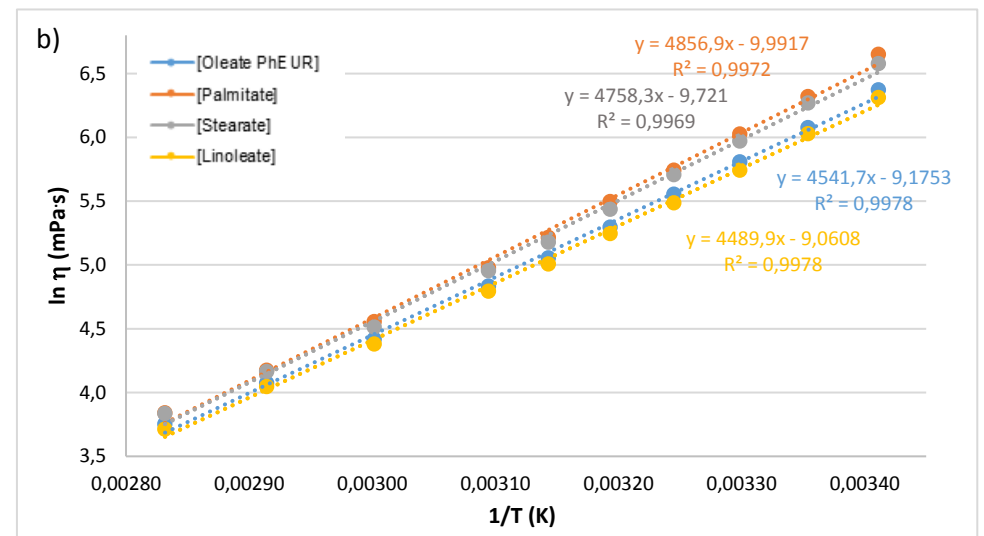



Figure S50. DSC thermogram of **1** (heating rate of 5 K·min<sup>-1</sup>).

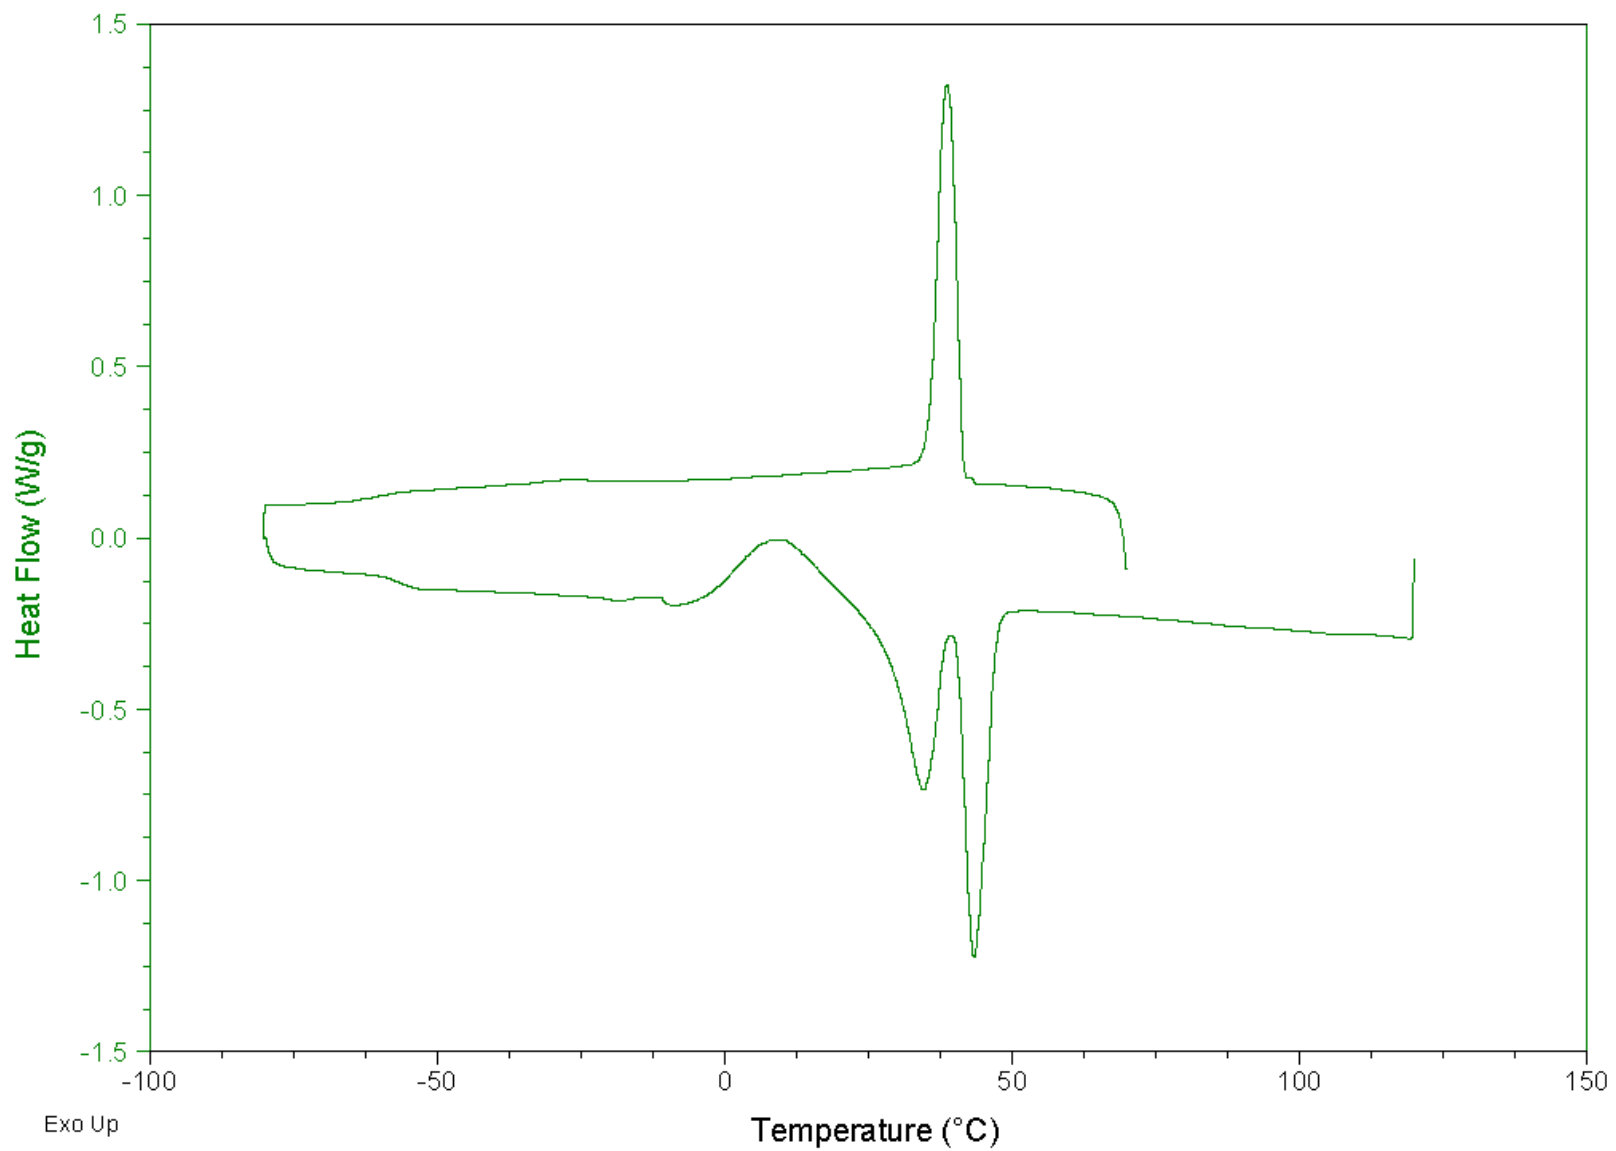

Figure S51. DSC thermogram of **2** (heating rate of 5 K·min<sup>-1</sup>).

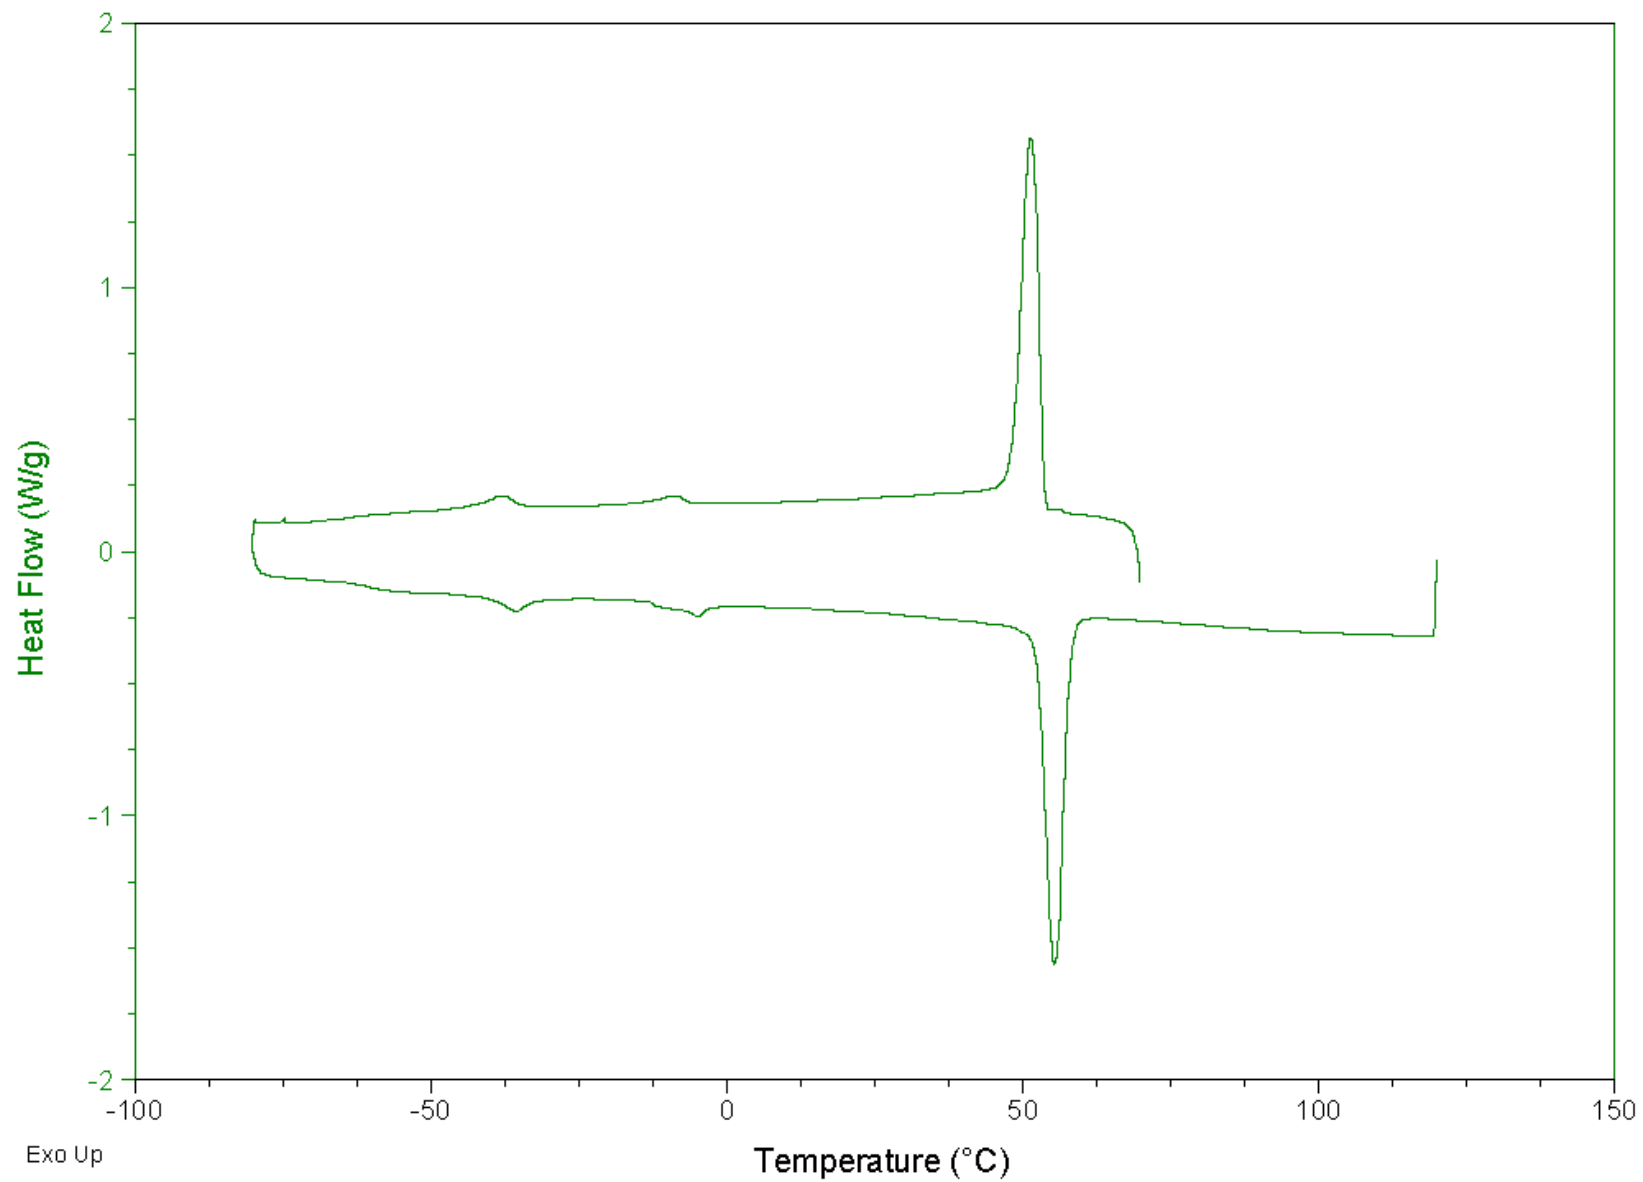

Figure S52. DSC thermogram of **4** (heating rate of 5 K·min<sup>-1</sup>).

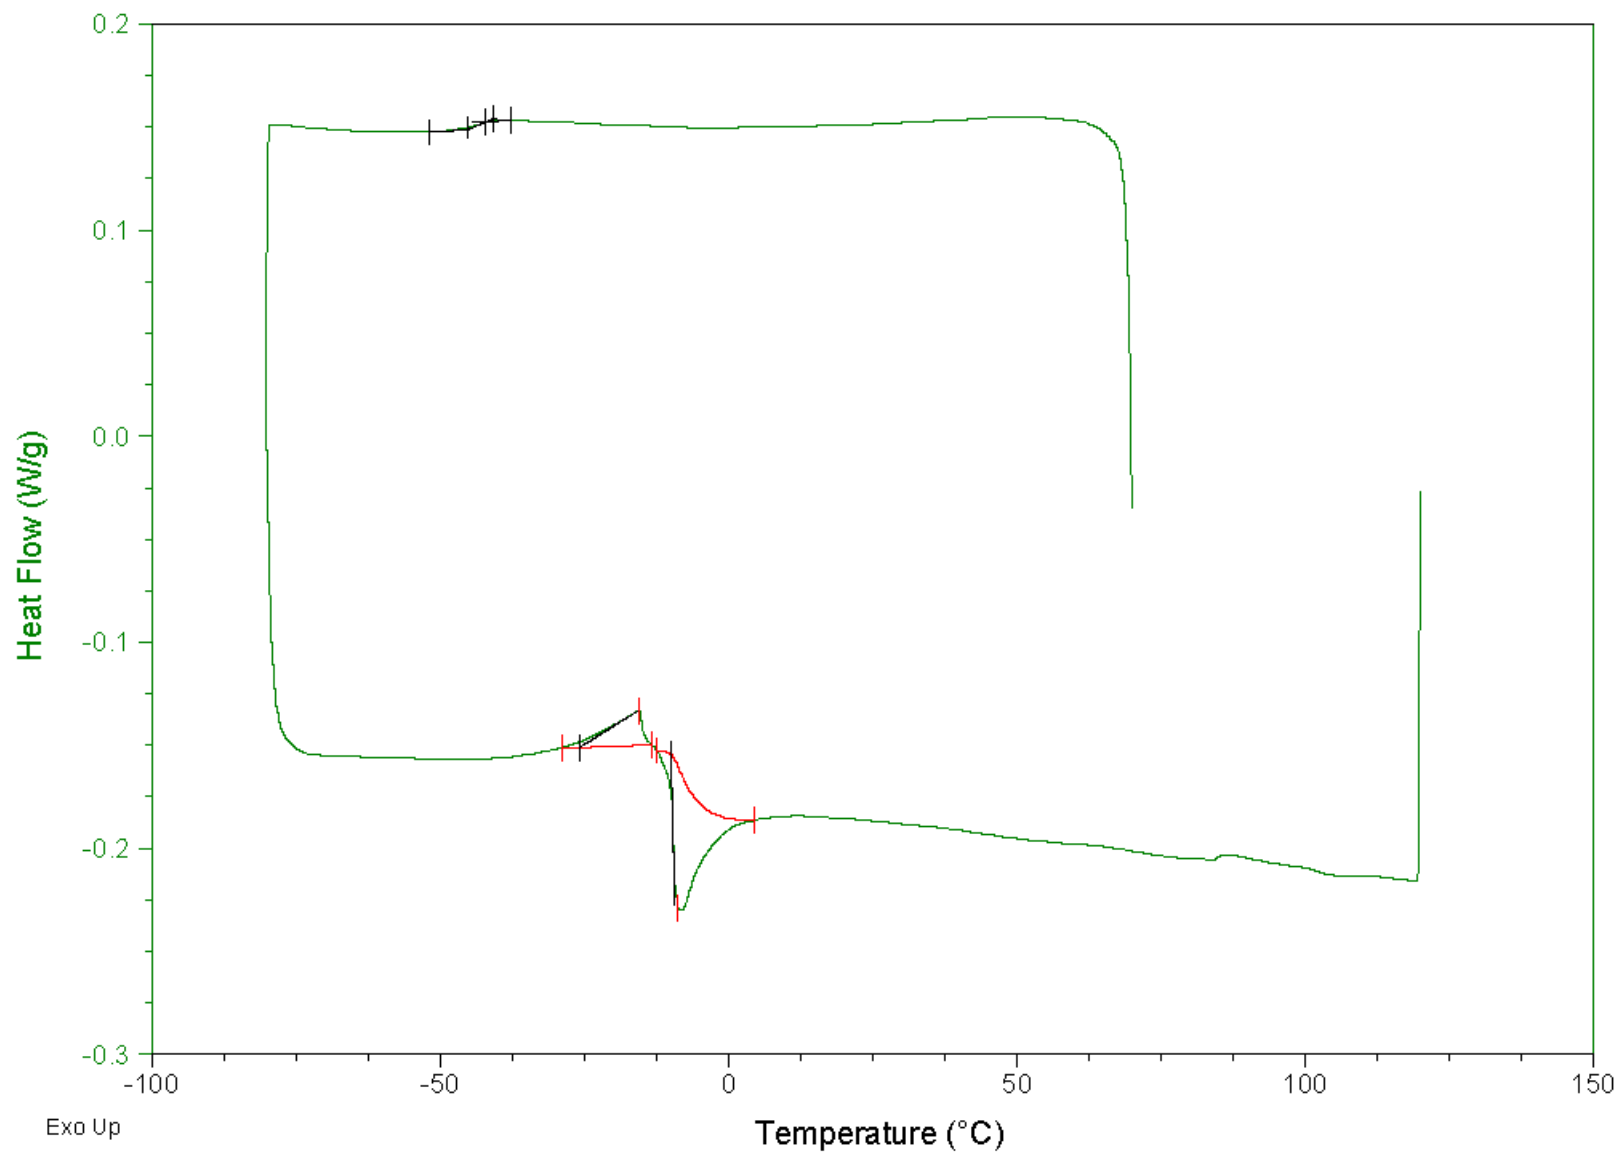

Figure S53. DSC thermogram of **6** (heating rate of 5 K·min<sup>-1</sup>).

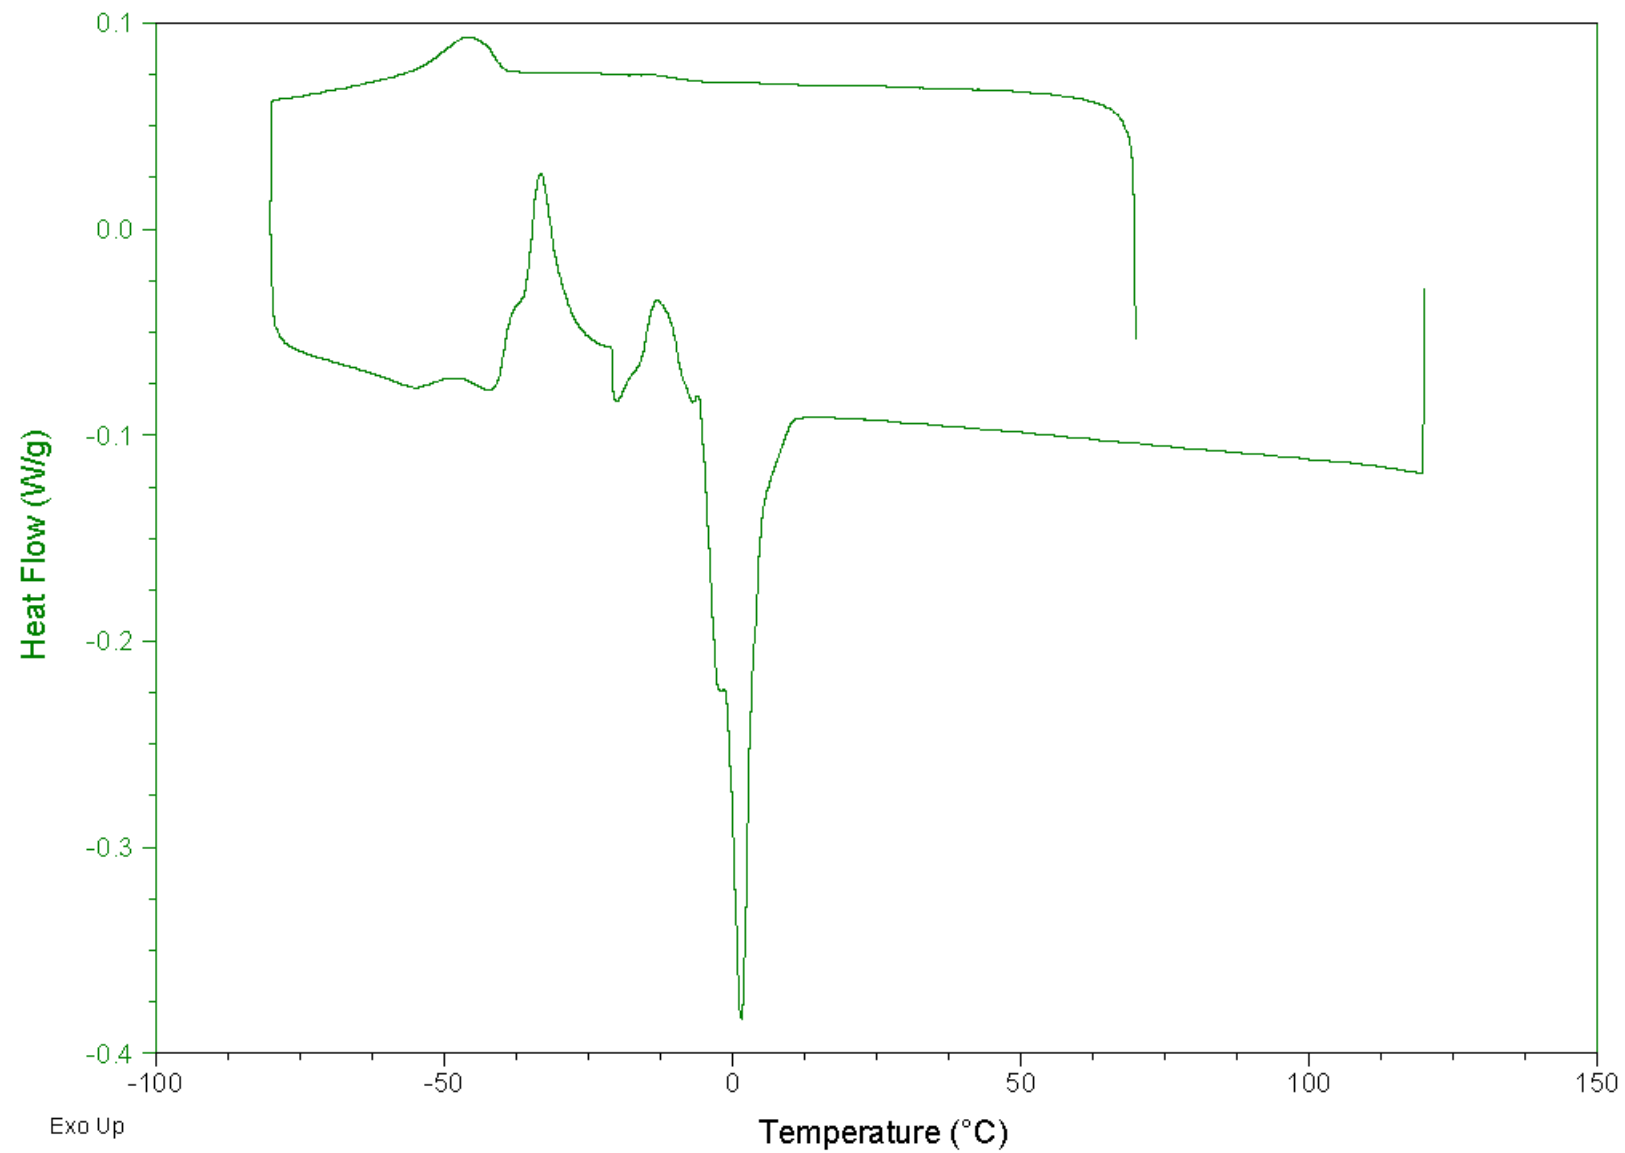

Figure S54. DSC thermogram of **7** (heating rate of 5 K·min<sup>-1</sup>).

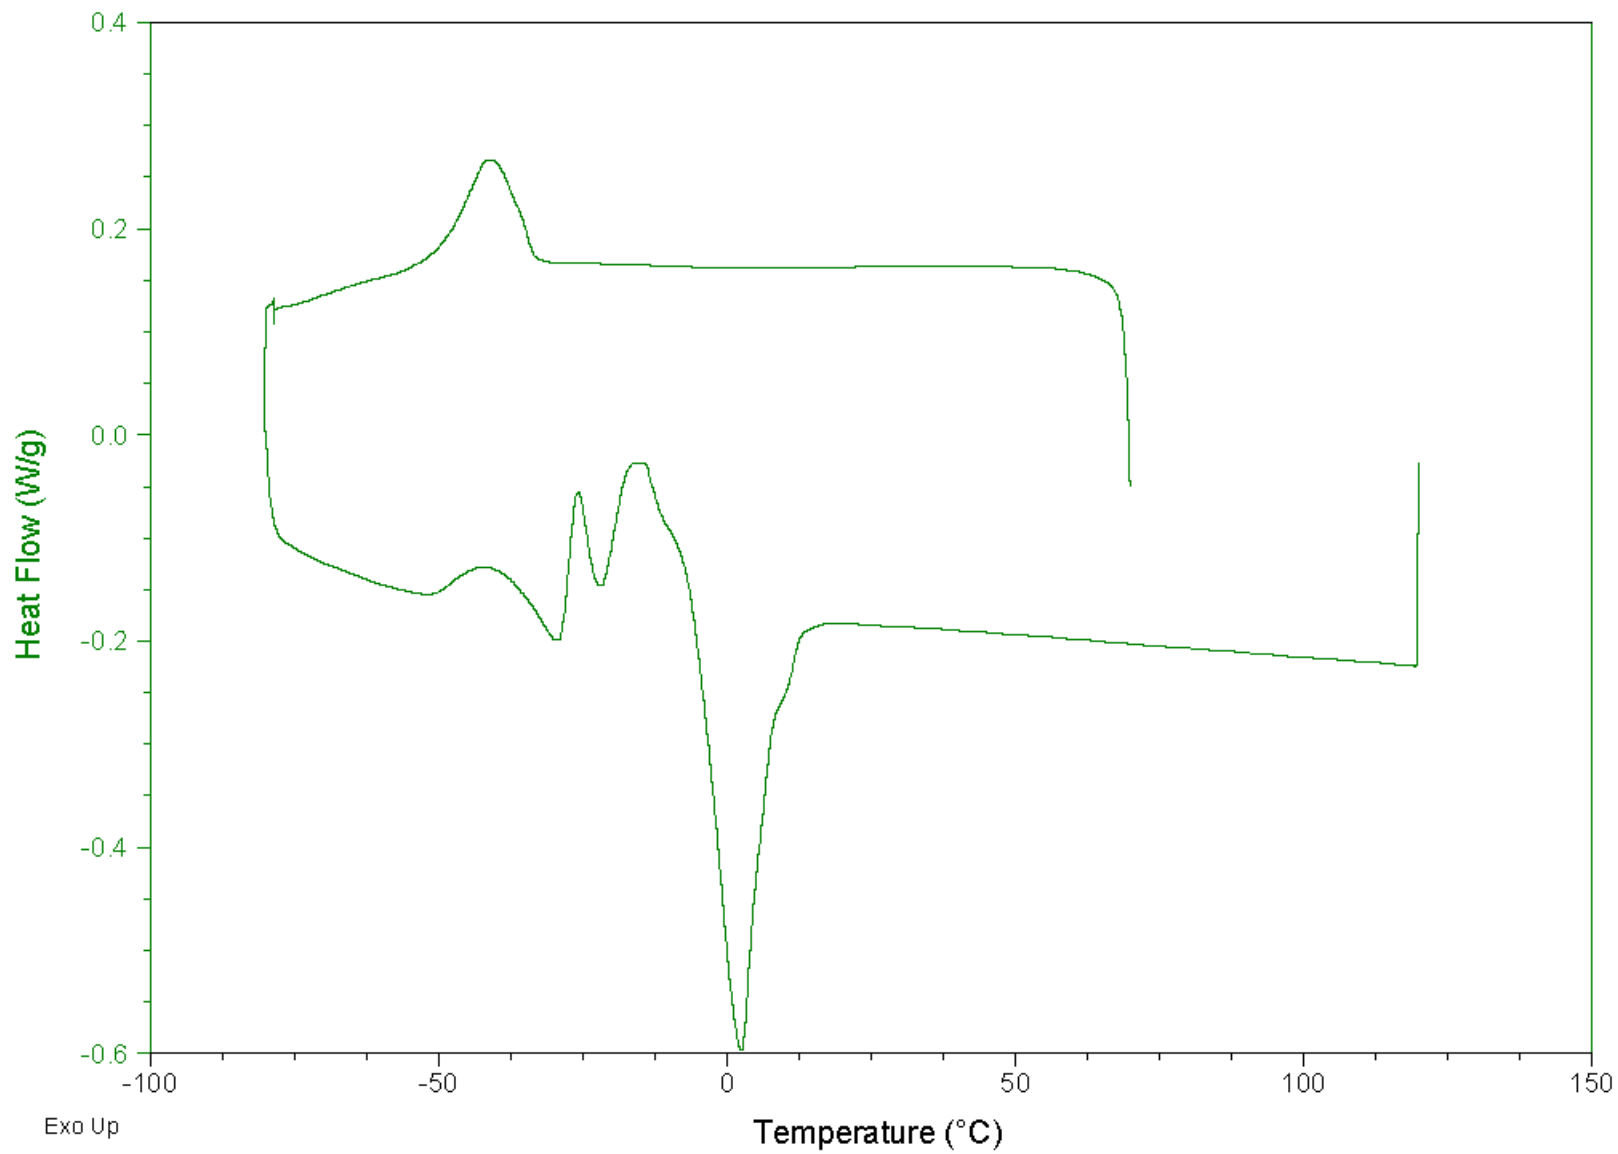



Figure S56. DSC thermogram of **11** (heating rate of 5 K·min<sup>-1</sup>).

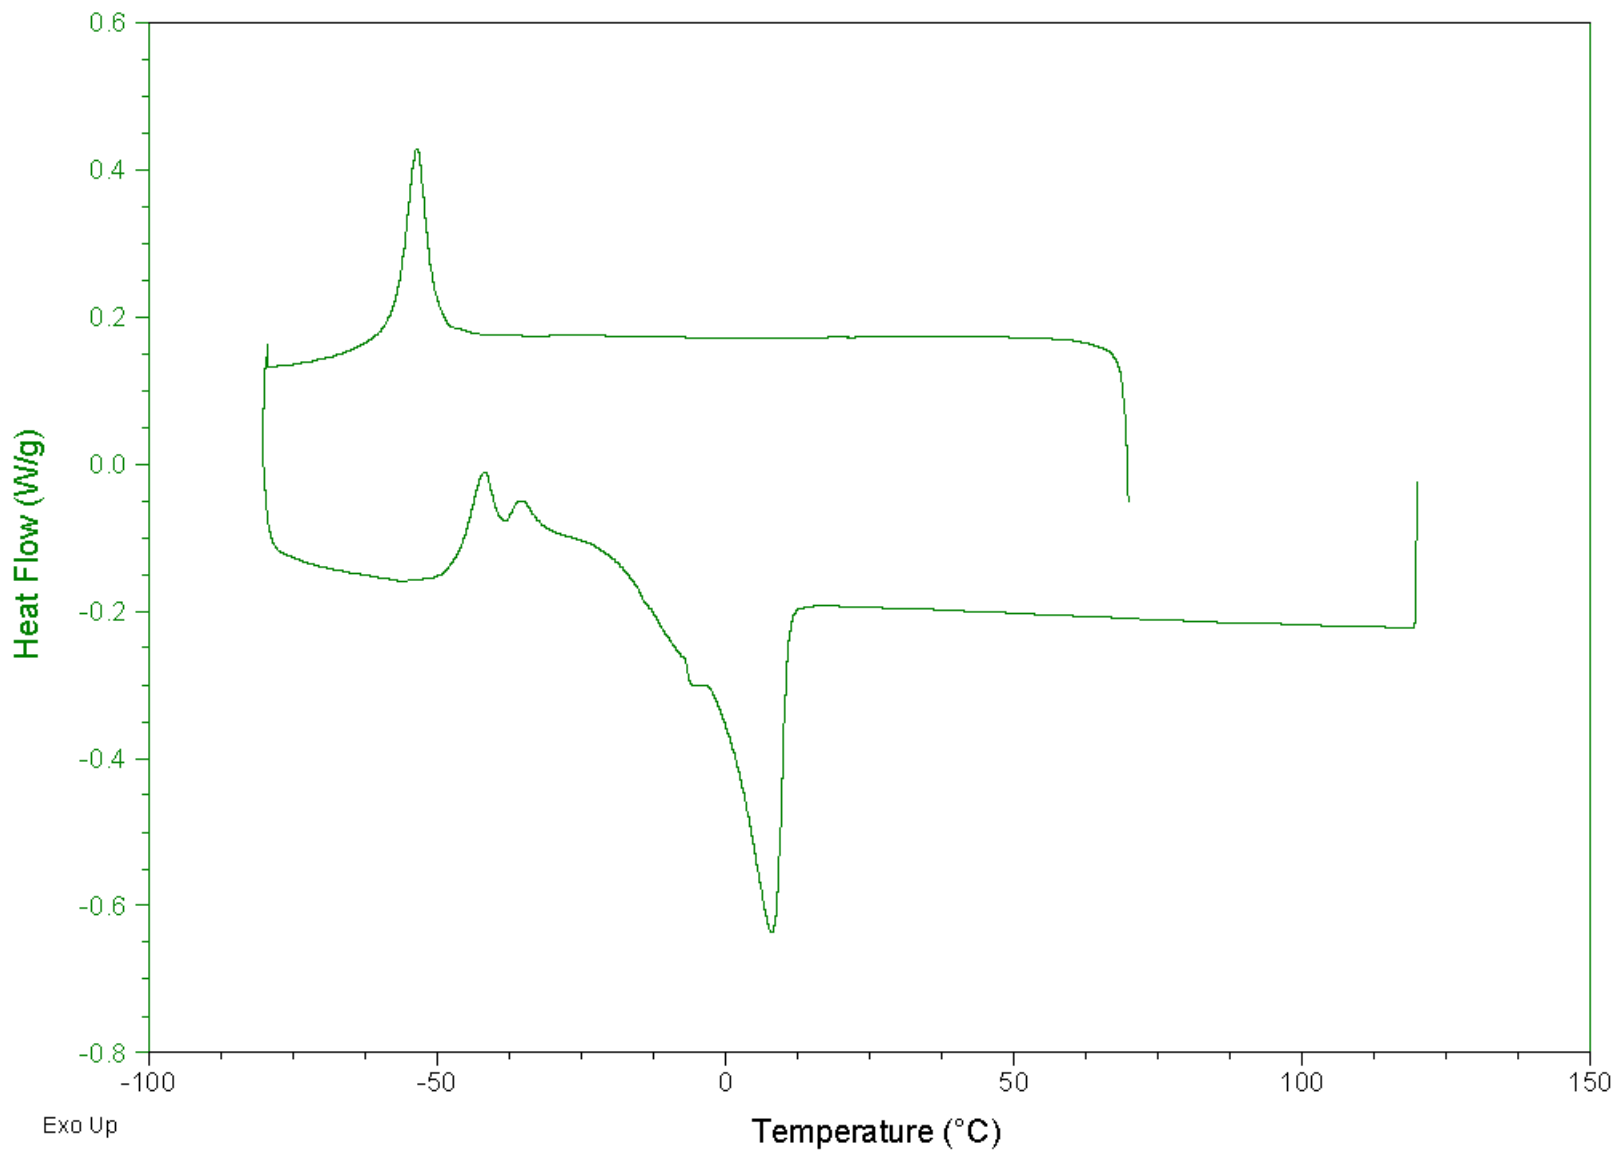

Figure S57. DSC thermogram of **12** (heating rate of 5 K·min<sup>-1</sup>).

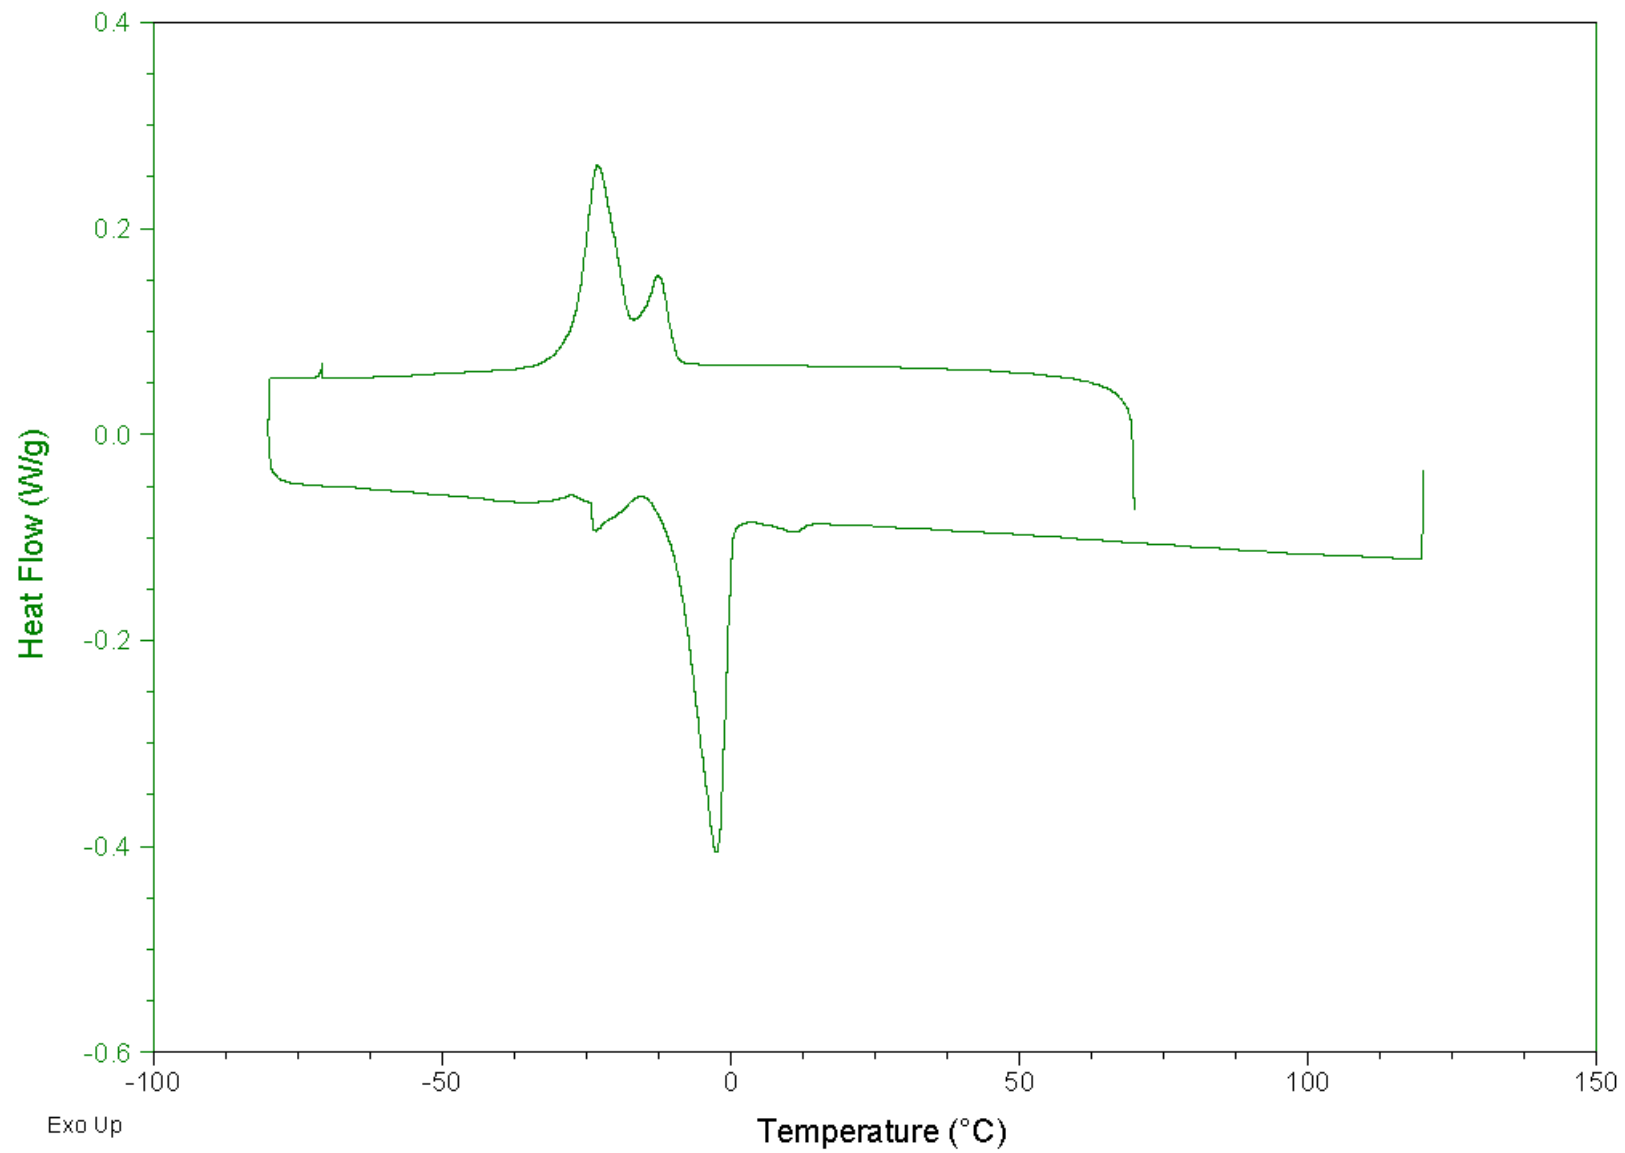



Figure S58. DSC thermogram of **13** (heating rate of 5 K·min<sup>-1</sup>).

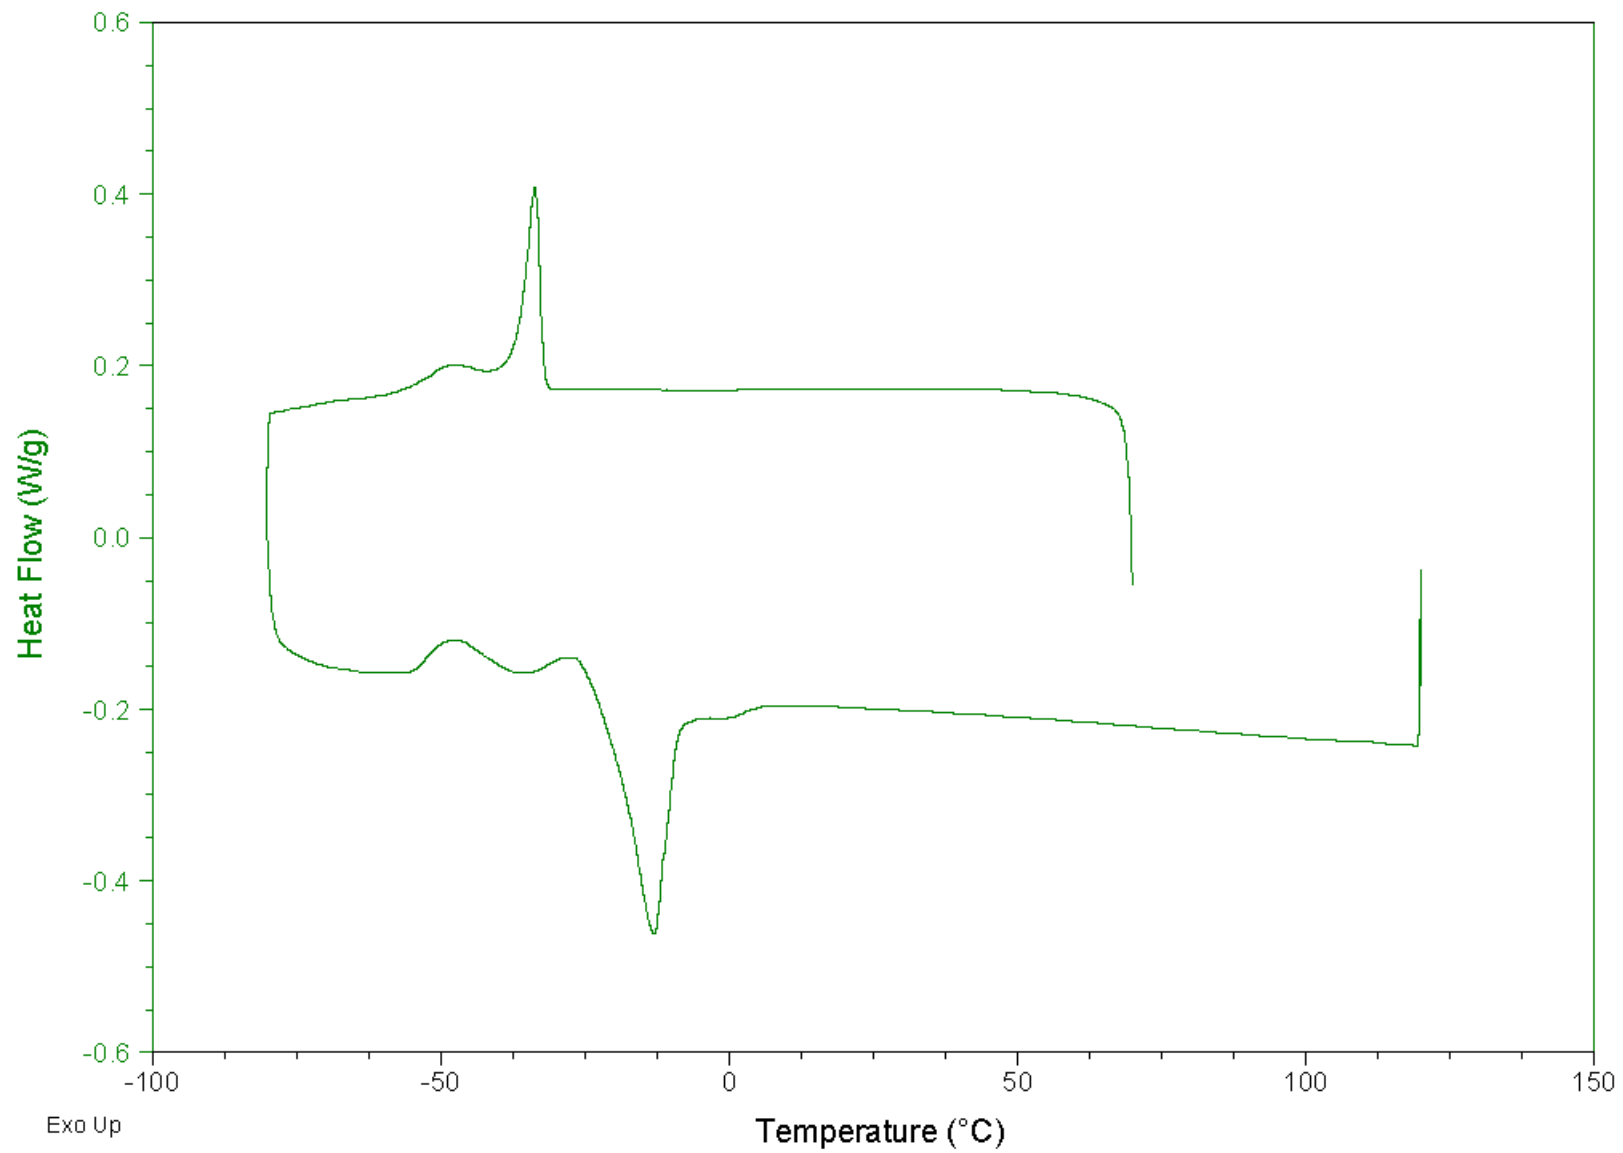

Figure S59. DSC thermogram of **14** (heating rate of 5 K·min<sup>-1</sup>).

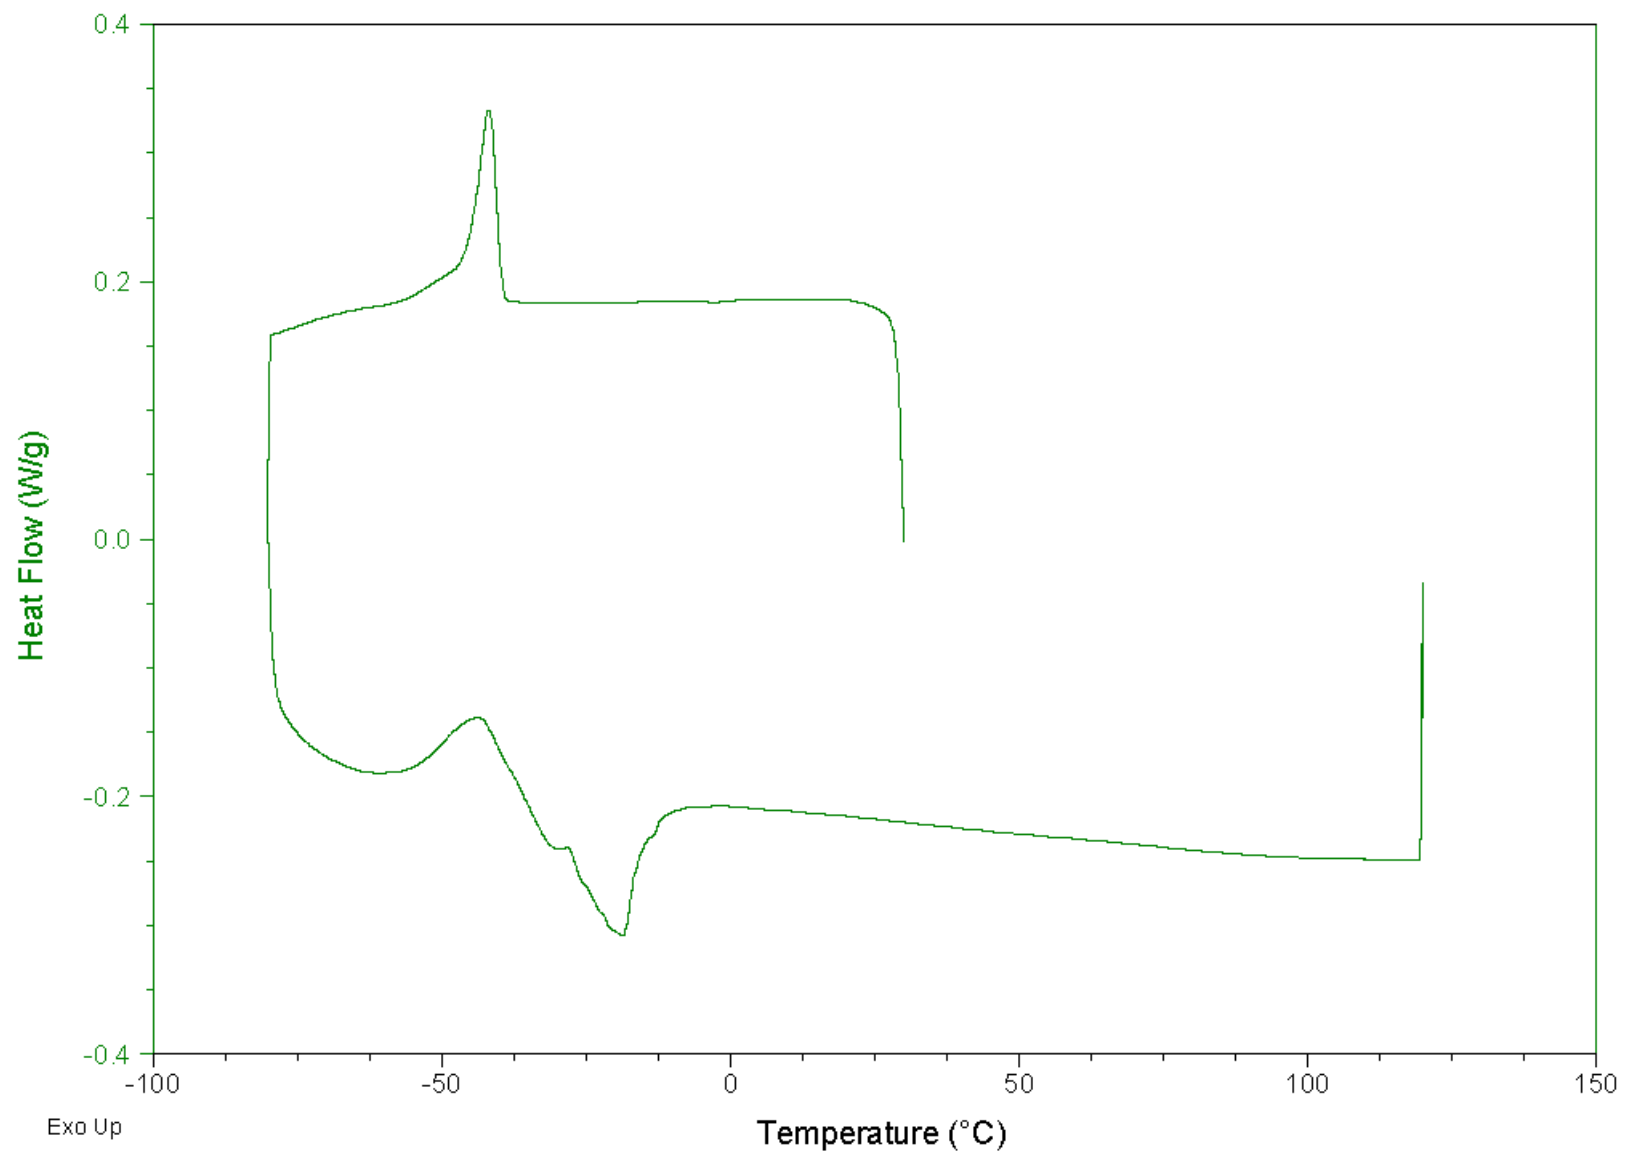

Supplement: c7gc00830a1.pdf [file c7gc00830a1.pdf]
